# Supplementary material for: Burden of lower respiratory infections and associated risk factors across regions in Ethiopia: a subnational analysis of the Global Burden of Diseases 2019 study
Source: PubMed Central journal article supplement (PMC10481843; doi:10.1136/bmjopen-2022-068498), 2023-09-04
Supplement: bmjopen-2022-068498.draft_revisions.pdf [file bmjopen-2022-068498.draft_revisions.pdf]

# BMJ Open

BMJ Open is committed to open peer review. As part of this commitment we make the peer review history of every article we publish publicly available.

When an article is published we post the peer reviewers' comments and the authors' responses online. We also post the versions of the paper that were used during peer review. These are the versions that the peer review comments apply to.

The versions of the paper that follow are the versions that were submitted during the peer review process. They are not the versions of record or the final published versions. They should not be cited or distributed as the published version of this manuscript.

BMJ Open is an open access journal and the full, final, typeset and author-corrected version of record of the manuscript is available on our site with no access controls, subscription charges or pay-per-view fees (<http://bmjopen.bmj.com>).

If you have any questions on BMJ Open's open peer review process please email [info.bmjopen@bmj.com](mailto:info.bmjopen@bmj.com)

# BMJ Open

## The Burden of Lower Respiratory Infections and the Risk Factors across Regions in Ethiopia: Global Burden of Diseases Study 1990-2019

|                               |                                                                                                                                                                                                                                                                                                                                                                                                                                                                                                                                                                                                                                                                                                                                                                                                                                                                                                                                                                                                                                                                                                                                                                                                                                                                                                                                                                                                                                                                                                                                                                                                                                                                                                                                                                                                                                                                                                                                                                                                                                                                                                                                                                  |
|-------------------------------|------------------------------------------------------------------------------------------------------------------------------------------------------------------------------------------------------------------------------------------------------------------------------------------------------------------------------------------------------------------------------------------------------------------------------------------------------------------------------------------------------------------------------------------------------------------------------------------------------------------------------------------------------------------------------------------------------------------------------------------------------------------------------------------------------------------------------------------------------------------------------------------------------------------------------------------------------------------------------------------------------------------------------------------------------------------------------------------------------------------------------------------------------------------------------------------------------------------------------------------------------------------------------------------------------------------------------------------------------------------------------------------------------------------------------------------------------------------------------------------------------------------------------------------------------------------------------------------------------------------------------------------------------------------------------------------------------------------------------------------------------------------------------------------------------------------------------------------------------------------------------------------------------------------------------------------------------------------------------------------------------------------------------------------------------------------------------------------------------------------------------------------------------------------|
| Journal:                      | <i>BMJ Open</i>                                                                                                                                                                                                                                                                                                                                                                                                                                                                                                                                                                                                                                                                                                                                                                                                                                                                                                                                                                                                                                                                                                                                                                                                                                                                                                                                                                                                                                                                                                                                                                                                                                                                                                                                                                                                                                                                                                                                                                                                                                                                                                                                                  |
| Manuscript ID                 | bmjopen-2022-068498                                                                                                                                                                                                                                                                                                                                                                                                                                                                                                                                                                                                                                                                                                                                                                                                                                                                                                                                                                                                                                                                                                                                                                                                                                                                                                                                                                                                                                                                                                                                                                                                                                                                                                                                                                                                                                                                                                                                                                                                                                                                                                                                              |
| Article Type:                 | Original research                                                                                                                                                                                                                                                                                                                                                                                                                                                                                                                                                                                                                                                                                                                                                                                                                                                                                                                                                                                                                                                                                                                                                                                                                                                                                                                                                                                                                                                                                                                                                                                                                                                                                                                                                                                                                                                                                                                                                                                                                                                                                                                                                |
| Date Submitted by the Author: | 13-Oct-2022                                                                                                                                                                                                                                                                                                                                                                                                                                                                                                                                                                                                                                                                                                                                                                                                                                                                                                                                                                                                                                                                                                                                                                                                                                                                                                                                                                                                                                                                                                                                                                                                                                                                                                                                                                                                                                                                                                                                                                                                                                                                                                                                                      |
| Complete List of Authors:     | <p>Yigezu, Amanuel; Ethiopian Public Health Institute<br/> Misganaw, Awoke; University of Washington, Department of Health Metrics Sciences; Ethiopian Public Health Association, Getnet, Fentabil; Jigjiga University; Ethiopian Public Health Institute<br/> Berheto, Tezera; Ethiopian Public Health Institute<br/> Walker, Ally ; University of Washington, Department of Health Metrics Sciences<br/> Zergaw, Ababi; Ethiopian Public Health Institute; Addis Ababa University College of Health Sciences, Department of Health Systems and Policy<br/> Gobena, Firehiwot ; Ethiopian Health Insurance Service<br/> Haile, Muluken ; Ethiopian Health Insurance Service<br/> Hailu, Alemayehu; University of Bergen, Department of Global Public Health and Primary Care Medicine<br/> Memirie, Solomon Tessema; Addis Ababa University, Addis Center for Ethics and Priority Setting; Harvard University, Harvard T.H. Chan School of Public Health<br/> Tolosa, Dereje ; Ethiopian Health Insurance Service<br/> Abate, Semagn Mekonnen; Dilla University College of Health Sciences, Department of Anesthesiology<br/> Molla Adane, Mesafint; Bahir Dar University College of Medical and Health Sciences<br/> Akalu, Gizachew ; St Paul's Hospital Millennium Medical College; Addis Ababa University College of Health Sciences<br/> Aklilu, Addis ; Arba Minch University<br/> Alem, Dejene; Debre Markos University College of Health Science, Adult health nursing;<br/> Gebru, Zeleke; Arba Minch University, public health; Arba minch university<br/> Asemahagn, Mulusew; Bahir Dar University College of Medical and Health Sciences, School of Public Health;<br/> Atlaw, Daniel; Madda Walabu University, ;<br/> Awoke, Tewachew ; Bahir Dar University<br/> Abebe, Hunegnaw ; Wollo University, public health<br/> Belete, Melaku; Wollo University<br/> Hailemariam, Tekleberhan; Mekelle University<br/> Yirga, Alemeshet; Bahir Dar University, Department of pharmacy<br/> Birara, Setognal; Samara University, Public Health<br/> Bodicha, Belay ; Arba Minch University<br/> Churko, Chuchu ; Arba Minch University, Public health</p> |

|           |                                                                                                                                                                                                                                                                                                                                                                                                                                                                                                                                                                                                                                                                                                                                                                                                                                                                                                                                                                                                                                                                                                                                                                                                                                                                                                                                                                                                   |
|-----------|---------------------------------------------------------------------------------------------------------------------------------------------------------------------------------------------------------------------------------------------------------------------------------------------------------------------------------------------------------------------------------------------------------------------------------------------------------------------------------------------------------------------------------------------------------------------------------------------------------------------------------------------------------------------------------------------------------------------------------------------------------------------------------------------------------------------------------------------------------------------------------------------------------------------------------------------------------------------------------------------------------------------------------------------------------------------------------------------------------------------------------------------------------------------------------------------------------------------------------------------------------------------------------------------------------------------------------------------------------------------------------------------------|
|           | <p>Demeke, Feleke ; Bahir Dar University College of Medical and Health Sciences<br/> Desta, Abebaw ; University of Gondar<br/> Ena, Lankamo; Arba Minch University,<br/> Eyayu, Tahir; Debre Tabor University, Department of Medical Laboratory Sciences<br/> Fentaw, Zinabu; Wollo University, Department of Epidemiology and Biostatistics; Wollo University, Epidemiology and Biostatistics<br/> Gargamo, Daniel ; Wolaita Sodo University<br/> Gebrehiwot, Mesfin ; Wollo University<br/> Gebremichael, Mathewos ; Arba Minch University<br/> Getachew, Melaku ; Haramaya University College of Health and Medical Sciences<br/> Molla, Getahun ; University of Gondar, University of Gondar Hospital<br/> Sahiledengle, Biniyam; Madda Walabu University, Public Health<br/> Beyene, Bereket; Arba Minch University<br/> Sibhat, Migbar; Dilla University College of Health Sciences, Nursing;<br/> Sidamo, Negussie ; Arba Minch University, Public Health<br/> Solomon, Damtew ; Madda Walabu University<br/> Solomon, Yonatan ; Dire Dawa University<br/> Wagaye, Birhanu; Wollo University; Ethiopian Public Health Institute<br/> Wedajo, Shambel; Wollo University,<br/> Weldemariam, Melat; Arba Minch University, Department of Medical Laboratory Sciences<br/> Yismaw, Yazachew ; Bahir Dar University<br/> Naghavi, Moshen; University of Washington School of Public Health,</p> |
| Keywords: | <p>Epidemiology &lt; INFECTIOUS DISEASES, Respiratory infections &lt; THORACIC MEDICINE, Health policy &lt; HEALTH SERVICES ADMINISTRATION &amp; MANAGEMENT</p>                                                                                                                                                                                                                                                                                                                                                                                                                                                                                                                                                                                                                                                                                                                                                                                                                                                                                                                                                                                                                                                                                                                                                                                                                                   |
|           |                                                                                                                                                                                                                                                                                                                                                                                                                                                                                                                                                                                                                                                                                                                                                                                                                                                                                                                                                                                                                                                                                                                                                                                                                                                                                                                                                                                                   |

SCHOLARONE™  
Manuscripts

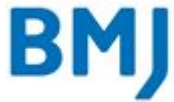

I, the Submitting Author has the right to grant and does grant on behalf of all authors of the Work (as defined in the below author licence), an exclusive licence and/or a non-exclusive licence for contributions from authors who are: i) UK Crown employees; ii) where BMJ has agreed a CC-BY licence shall apply, and/or iii) in accordance with the terms applicable for US Federal Government officers or employees acting as part of their official duties; on a worldwide, perpetual, irrevocable, royalty-free basis to BMJ Publishing Group Ltd ("BMJ") its licensees and where the relevant Journal is co-owned by BMJ to the co-owners of the Journal, to publish the Work in this journal and any other BMJ products and to exploit all rights, as set out in our [licence](#).

The Submitting Author accepts and understands that any supply made under these terms is made by BMJ to the Submitting Author unless you are acting as an employee on behalf of your employer or a postgraduate student of an affiliated institution which is paying any applicable article publishing charge ("APC") for Open Access articles. Where the Submitting Author wishes to make the Work available on an Open Access basis (and intends to pay the relevant APC), the terms of reuse of such Open Access shall be governed by a Creative Commons licence – details of these licences and which [Creative Commons](#) licence will apply to this Work are set out in our licence referred to above.

Other than as permitted in any relevant BMJ Author's Self Archiving Policies, I confirm this Work has not been accepted for publication elsewhere, is not being considered for publication elsewhere and does not duplicate material already published. I confirm all authors consent to publication of this Work and authorise the granting of this licence.

1  
2  
3 1 The Burden of Lower Respiratory Infections and the Risk Factors across Regions in Ethiopia:  
4 2 Global Burden of Diseases Study 1990-2019

5  
6  
7 3 Ethiopia Subnational-Level Lower Respiratory Infections Burden collaborators

8  
9 4 Amanuel Yigezu\*,<sup>1</sup> Awoke Misganaw\*,<sup>2,1</sup> Fentabil Getnet,<sup>1,3</sup> Tezera Moshago Berheto,<sup>4</sup> Ally  
10 5 Walker,<sup>5</sup> Ababi Zergaw,<sup>6,1</sup> Firehiwot Abebe Gobena,<sup>7</sup> Muluken Argaw Haile,<sup>8</sup> Alemayehu Hailu,<sup>9</sup>  
11 6 Solomon Tessema Memirie,<sup>10</sup> Dereje Mengistu Tolosa,<sup>11</sup> Semagn Mekonnen Abate,<sup>12</sup> Mesafint  
12 7 Molla Adane,<sup>13</sup> Gizachew Tadesse Akalu,<sup>14,15</sup> Addis Aklilu,<sup>16</sup> Dejene Tsegaye Alem,<sup>17</sup> Zeleke  
13 8 Gebru,<sup>18</sup> Mulusew Andualem Asemahagn,<sup>19</sup> Daniel Atlaw,<sup>20</sup> Tewachew Awoke,<sup>21</sup> Hunegnaw  
14 9 Abebe,<sup>22</sup> Melaku Ashagrie Belete,<sup>23</sup> Tekleberhan Hailemariam,<sup>24</sup> Alemeshet Yirga,<sup>25</sup> Setognal  
15 10 Birara Aychiluhm,<sup>26</sup> Belay Boda Abule Bodicha,<sup>27</sup> Chuchu Churko,<sup>18</sup> Feleke Mekonnen  
16 11 Demeke,<sup>21</sup> Abebaw Alemayehu Desta,<sup>28</sup> Lankamo Ena,<sup>29</sup> Tahir Eyayu,<sup>30</sup> Zinabu Fentaw,<sup>31</sup> Daniel  
17 12 Baza Gargamo,<sup>32</sup> Mesfin Damtew Gebrehiwot,<sup>33</sup> Mathewos Alemu Gebremichael,<sup>34</sup> Melaku  
18 13 Getachew,<sup>35</sup> Getahun Molla,<sup>36</sup> Biniyam Sahiledengle,<sup>37</sup> Bereket Beyene,<sup>38</sup> Migbar Sibhat,<sup>39</sup>  
19 14 Negussie Boti Sidamo,<sup>18</sup> Damtew Solomon,<sup>40</sup> Yonatan Solomon,<sup>41</sup> Birhanu Wagaye,<sup>42,43</sup> Shambel  
20 15 Wedajo,<sup>22</sup> Melat Weldemariam,<sup>16</sup> Yazachew Yismaw,<sup>44,45</sup> Mohsen Naghavi.<sup>5,2</sup>

21  
22  
23  
24  
25 16 \*Joint first authors

26  
27 17 **Affiliations**

28  
29 18 <sup>1</sup>National Data Management Center for Health (NDMC), Ethiopian Public Health Institute, Addis  
30 19 Ababa, Ethiopia; <sup>2</sup>Department of Health Metrics Sciences, School of Medicine, University of  
31 20 Washington, Seattle, WA, USA; <sup>3</sup>Department of Epidemiology, Jigjiga University, Jigjiga,  
32 21 Ethiopia; <sup>4</sup>HIV and TB Research Directorate, Ethiopian Public Health Institute, Addis Ababa,  
33 22 Ethiopia; <sup>5</sup>Institute for Health Metrics and Evaluation, University of Washington, Seattle, WA,  
34 23 USA; <sup>6</sup>Department of Health Systems and Policy, Addis Ababa University, Addis Ababa,  
35 24 Ethiopia; <sup>7</sup>Ethiopian Health Insurance Service, Addis Ababa, Ethiopia; <sup>8</sup>Program Section,  
36 25 Ethiopian Health Insurance Service, Addis Ababa, Ethiopia; <sup>9</sup>Department of Global Public Health  
37 26 and Primary Care, University of Bergen, Bergen, Norway; <sup>10</sup>Addis Center for Ethics and Priority  
38 27 Setting, Addis Ababa University, Addis Ababa, Ethiopia; <sup>11</sup>Ethiopian Health Insurance Service,  
39 28 Ministry of Health, Addis Ababa, Ethiopia; <sup>12</sup>Department of Anesthesiology, Dilla University,  
40 29 Addis Ababa, Ethiopia; <sup>13</sup>College of Medicine and Health Sciences, Bahir Dar University, Bahir  
41 30 Dar, Ethiopia; <sup>14</sup>Department of Microbiology, Immunology and Parasitology, St. Paul's Hospital  
42 31 Millennium Medical College, Addis Ababa, Ethiopia; <sup>15</sup>Department of Microbial, Cellular and  
43 32 Molecular Biology, Addis Ababa University, Addis Ababa, Ethiopia; <sup>16</sup>Department of Medical  
44 33 Laboratory Sciences, Arba Minch University, Arba Minch, Ethiopia; <sup>17</sup>Department of Nursing,  
45 34 Debre Markos University, Debre Markos, Ethiopia; <sup>18</sup>School of Public Health, Arba Minch  
46 35 University, Arba Minch, Ethiopia; <sup>19</sup>School of Public Health, Bahir Dar University, Bahir Dar,  
47 36 Ethiopia; <sup>20</sup>Department of Biomedical Science, Madda Walabu University, Bale Robe, Ethiopia;  
48 37 <sup>21</sup>Department of Medical Laboratory Sciences, Bahir Dar University, Bahir Dar, Ethiopia;  
49 38 <sup>22</sup>Department of Public Health, Wollo University, Dessie, Ethiopia; <sup>23</sup>Department of Medical  
50 39 Laboratory Sciences, Wollo University, Dessie, Ethiopia; <sup>24</sup>Department of Medical Physiology,

1  
2  
3 40 Mekelle University, Mekelle, Ethiopia; <sup>25</sup>School of Health Science, Bahir Dar University, Bahir  
4 41 Dar, Ethiopia; <sup>26</sup>Department of Public Health, Samara University, Samara, Ethiopia; <sup>27</sup>Department  
5 42 of Biomedical Sciences , Arba Minch University, Arba Minch, Ethiopia; <sup>28</sup>Department of Surgical  
6 43 Nursing, University of Gondar, Gondar, Ethiopia; <sup>29</sup>Department of Comprehensive Nursing, Arba  
7 44 Minch University, Arba Minch, Ethiopia; <sup>30</sup>Department of Medical Laboratory Sciences, Debre  
8 45 Tabor University, Debre Tabor, Ethiopia; <sup>31</sup>Department of Epidemiology and Biostatistics, Wollo  
9 46 University, Dessie, Ethiopia; <sup>32</sup>Department of Pediatrics and Neonatal Nursing, Wolaita Sodo  
10 47 University, Wolaita Sodo, Ethiopia; <sup>33</sup>Department of Environmental Health, Wollo University,  
11 48 Dessie, Ethiopia; <sup>34</sup>Department of Epidemiology and Biostatistics, Arba Minch University, Arba  
12 49 Minch, Ethiopia; <sup>35</sup>Department of Emergency and Critical Care Medicine, Haramaya University,  
13 50 Harar, Ethiopia; <sup>36</sup>Department of Epidemiology and Biostatistics, University of Gondar, Gondar,  
14 51 Ethiopia; <sup>37</sup>Department of Public Health, Madda Walabu University, Bale Robe, Ethiopia;  
15 52 <sup>38</sup>Department of Nursing, Arba Minch University, Arba Minch, Ethiopia; <sup>39</sup>Department of  
16 53 Pediatrics and Child Health Nursing, Dilla University, Dilla, Ethiopia; <sup>40</sup>Department of Anatomy,  
17 54 Madda Walabu University, Bale Robe, Ethiopia; <sup>41</sup>Department of Nursing, Dire Dawa University,  
18 55 Dire Dawa, Ethiopia; <sup>42</sup>College of Medicine and Health Sciences, Wollo University, Dessie,  
19 56 Ethiopia; <sup>43</sup>Water, Sanitation and Hygiene Unit, Ethiopian Public Health Institute, Addis Ababa,  
20 57 Ethiopia; <sup>44</sup>Department of Pharmacology, Bahir Dar University, Bahir Dar, Ethiopia; <sup>45</sup>Pharmacy  
21 58 Department, Alkan Health Science, Business and Technology College, Bahir Dar, Ethiopia.

22  
23  
24  
25  
26  
27  
28 59 Corresponding Author: Amanuel Yigezu; [yigezuamanuel@yahoo.com](mailto:yigezuamanuel@yahoo.com)

29  
30  
31 60 Submitting Author: Awoke Misganaw

32 61 - Main text word count: Current: 4487

33  
34  
35 62

36  
37  
38 63

39  
40 64

41  
42  
43 65

44  
45 66

46  
47  
48 67

49  
50 68

51  
52  
53 69

54  
55 70

1  
2  
3 71 **Abstract**

4  
5 72 **Objective:** This analysis is to present the burden and trends of morbidity and mortality due to  
6  
7 73 LRIs, their contributing risk factors, and the disparity across administrative regions and cities from  
8  
9 74 1990 to 2019.

11  
12 75 **Design:** This analysis is part of a collaborative and comparable systematic Global Burden of  
13  
14 76 Disease (GBD 2019) study.

16  
17 77 **Study setting:** The study includes nine region states and two chartered cities of Ethiopia

18  
19 78 **Outcome Measures:** We calculated incidence, death, and years of life lost (YLLs) due to LRIs  
20  
21 79 and contributing risk factors using all accessible data sources. We calculated 95% uncertainty  
22  
23 80 intervals (UI) for the point estimates.

25  
26 81 **Results:** In 2019, LRIs incidence, death, and YLLs among all age groups were 8313.7 (95% UI:  
27  
28 82 7757.6–8918), 59.4 (49.8–71.4) and 2404.5 (2059.4–2833.3) per 100000 people, respectively.  
29  
30 83 From 1990, the corresponding decline rates were 39%, 61%, and 76%, respectively. Children  
31  
32 84 under the age of five years account for 20% of episodes, 42% of mortalities, and 70% of the YLL  
33  
34 85 of the total burden of LRIs in 2019. The mortality rate was significantly higher in predominantly  
35  
36 86 pastoralist regions–Benishangul-Gumuz 101.8 (84.0–121.7) and Afar 103.7 (86.6–122.6). The  
37  
38 87 Somali region showed the least decline in mortality rates. More than three-fourths of under-five  
39  
40 88 child deaths due to LRIs were attributed to malnutrition. Household air pollution from solid fuel  
41  
42 89 attributed to nearly half of the risk factors for all age mortalities due to LRIs in the country.

44  
45 90 **Conclusion:** In Ethiopia, LRIs have reduced significantly across the regions over the years (except  
46  
47 91 in elders), however are still the third leading cause of mortality, disproportionately affecting  
48  
49 92 children younger than five years old, and predominantly pastoralist regions. Interventions need to  
50  
51 93 consider leading risk factors, targeted age groups and pastoralist and cross-border communities.

52  
53 94 **Keywords:** *Lower respiratory infections, regions, chartered cities, Ethiopia*

1  
2  
3 95 ***What is already known on this topic***  
4

5 96 Lower respiratory infections (LRIs) remain a significant contributor to Ethiopia's morbidity and  
6  
7 97 mortality. LRIs are one of the leading causes of under-five mortality and are expected to increase  
8  
9 98 because of the current conflict, internal displacements, health care service interruption and the  
10  
11 99 COVID-19 pandemic. This work is among the first to present a comprehensive analysis of LRIs  
12  
13  
14 100 effect on morbidity and mortality, and their risk factors across all the regional states of Ethiopia  
15  
16  
17 101 over an extended time period to support health decision making at subnational levels.  
18

19 102 ***What this study adds***  
20

21 103 This is the first collaborative effort to provide the effects of LRIs and its risk factors on morbidity  
22  
23 104 and mortality for Ethiopia's nine regions and two chartered cities from 1990 to 2019. This analysis  
24  
25 105 highlights substantial decline morbidities and mortalities caused by LRIs over the last three  
26  
27 106 decades, as well as the disparities between regions and chartered cities, and the opportunity to  
28  
29 107 reduce LRIs burden of premature mortality by addressing specific geographic locations, risk  
30  
31 108 factors and age-groups with cost-effective interventions.  
32  
33

34  
35 109 ***How this study might affect research, practice or policy***  
36

37 110 The results identify regions and segments of the population highly affected by LRIs , and the  
38  
39 111 leading risk factors contributing to premature mortalities. These could be potential priorities for  
40  
41 112 action against LRIs that would reduce premature mortality. There is a need to enhance strategies  
42  
43 113 addressing predominantly pastoralist regions and cross-border communities and for quality health-  
44  
45 114 care services in underserved areas. Although morbidity and mortality have shown improvements  
46  
47 115 over the past three decades, LRIs burden is still high in parts of Ethiopia.  
48  
49

50  
51 116  
52  
53  
54  
55  
56  
57  
58  
59  
60



## 117 INTRODUCTION

118 Lower Respiratory Infections (LRIs) have been a predominant health problem worldwide, causing  
119 more than 2.3 million deaths in 2016 alone, amounting to a mortality rate of 32.2 per 100,000  
120 people (1). LRIs comprise diseases of the lower airways such as pneumonia, bronchitis, and  
121 bronchiolitis, among others (2). Nearly all (99%) of LRI deaths occur in low and middle income  
122 countries and highly affect children under the age of 5 years (3). In sub-Sahara African countries,  
123 the mortality rate is 66.4 per 100,000 people, which is four times the mortality rate in East Asia  
124 and twice the global average (2).

125 Ethiopia ranked in the top three African countries in the number of under-five child deaths from  
126 LRIs (4). To prevent child death from LRIs and other diseases in early life, Ethiopia has been  
127 implementing the “Integrated management of childhood illness” program since 1997 which was  
128 scaled up to the national level in 2007 (5). LRIs, and pneumonia in particular, have been among  
129 the top three leading causes of childhood mortality in the country (6). Among LRIs’ aetiologies,  
130 *S. pneumonia* contributed to more deaths than the other LRIs aetiologies combined (3). In 2011,  
131 the country introduced 10-valent pneumococcal conjugate vaccine (PCV 10) into its national  
132 immunization program to reduce the burden of Streptococcal pneumonia (7).

133 Morbidity and mortality from LRIs are attributable to multiple underlying factors. Malnutrition is  
134 one of the main underlying risk factors (8, 9). The other main attributable factor are poor living  
135 conditions that include household crowding, parental smoking, high use of household solid  
136 fuel/biomass consumption, poor ventilation, and lack of hand-washing facilities (10-12). In  
137 addition, bottle feeding also contributes to the burden of LRIs in children (13).

138 The flagship Ethiopian Health Extension Program (HEP) has been the backbone of the country’s  
139 health system strategies to reduce the burden of LRIs and other diseases through preventive and

1  
2  
3 140 health promotion activities at the community level. The HEP has also improved broader access to  
4  
5 141 health care, availability of essential antibiotics, and immunization mainly to the rural population  
6  
7  
8 142 since 2004 (14). In 2010, the country also introduced the “integrated community case  
9  
10 143 management” (ICCM) approach to treat pneumonia through trained health cadres of health  
11  
12 144 extension workers (HEWs) implementing HEP (15).

14  
15 145 Currently, Ethiopia is implementing its Health Sector Transformation Plan-2 (HSTP-2) which is  
16  
17 146 adapted from the Sustainable Development Goals. Some of the aims include increasing the  
18  
19 147 proportion of under-five children with pneumonia who received antibiotics from 48% to 69% and  
20  
21 148 improving full vaccination coverage from 44% to 69% between 2020 and 2025 (16). Commitment  
22  
23 149 to international goals such as The Global Action Plan for the Prevention and Control of Pneumonia  
24  
25 150 and Diarrhoea by 2025 could be reached if enough investment is made in high LRI burden  
26  
27 151 countries like Ethiopia (17).

28  
29  
30 152 As Ethiopia is a country of stark contrasts in socioeconomic, epidemiological, and geographical  
31  
32 153 variations, estimating disease burden at the regional level could provide valid and reliable  
33  
34 154 information to inform policy decisions, including efficient resource allocation to match the burden  
35  
36 155 in the subnational states. Hence, this paper presents the 2019 Global Burden of Diseases, Injuries,  
37  
38 156 and Risk Factors study (GBD) results on the burden, trends and regional variations of LRIs in  
39  
40 157 Ethiopia from 1990 to 2019.

## 44 45 158 **METHODS**

### 46 47 48 49 159 **Study Setting**

50  
51  
52 160 Ethiopia is the second-most populous country in Africa next to Nigeria, with an estimated  
53  
54 161 population of 112 million in 2019 (18). More than half of the country's population is under 20, and

1  
2  
3 162 over 80% of the population resides in rural areas (19). The country is subdivided into ten regional  
4  
5 163 states (Afar, Amhara, Benishangul-Gumuz, Gambella, Harari, Oromia, Somali, Sidama, Southern  
6  
7 164 Nations and Nationalities and Peoples (SNNP), and Tigray) and two chartered cities (Addis Ababa  
8  
9  
10 165 and Dire Dawa). During this study, Sidama was a zonal administration under the SNNP region.  
11  
12 166 Oromia, Amhara, and SNNP are the highly populated regions. In this study, we classified the  
13  
14 167 regions into urban (Addis Ababa, Dire Dawa, and Harari), agrarian (Oromia, Amhara, SNNP,  
15  
16 168 Tigray), and pastoralist (Benishangul-Gumuz, Afar, Gambella, and Somali). The healthcare  
17  
18 169 system of the country is a three-tiered system consisting of primary, secondary, and tertiary levels  
19  
20 170 of healthcare delivery units with 21,154 functioning health facilities and 159,545 health workforce  
21  
22 171 in 2019 (16). The primary health care unit (PHCU) consists of health posts (staffed by HEWs),  
23  
24 172 health centres, and primary hospitals. The secondary level of care consists of general hospitals and  
25  
26 173 the tertiary level of care includes national referral hospitals which provide specialized services  
27  
28  
29  
30  
31 174 (16).

### 34 175 **Data Sources and Analysis**

35  
36  
37 176 The analysis and findings of LRIs presented in this paper were produced by the Ethiopia  
38  
39 177 Subnational Burden of Disease Initiative, a collaborative endeavour between the National Data  
40  
41 178 Management Center for Health (NDMC) at the Ethiopian Public Health Institute (EPHI) and the  
42  
43 179 Institute for Health Metrics and Evaluation (IHME), as part of GBD. The details of the  
44  
45 180 methodology were described elsewhere (20). In brief, woreda (district) level geographic boundary  
46  
47 181 mapping of regions and cities was used because woredas were relatively stable government  
48  
49 182 structures (compared to lower or higher level administrative structures) during political or  
50  
51 183 government changes and through the three census years (1984, 1994, and 2007). First, the analysis  
52  
53 184 was estimated by mapping population and demography at the district level by time and region.  
54  
55  
56  
57  
58  
59  
60

1  
2  
3 185 Then, the data sources were mapped by regions before processing the data in the GBD analysis  
4  
5 186 based on GBD protocol. EPHI, in collaboration with IHME, gathered all accessible data sources  
6  
7 187 by location for Ethiopia and all regions and cities that included census, demographic surveillance,  
8  
9 188 household surveys, diseases registry, health service utilization, disease notification, and other data  
10  
11 189 for this analysis. A comprehensive description of data sources, quality, and modelling for GBD  
12  
13 190 2019 has been reported on the following online portal: ([http://ghdx.healthdata.org/gbd-2019/data-](http://ghdx.healthdata.org/gbd-2019/data-input-sources)  
14  
15 191 [input-sources](http://ghdx.healthdata.org/gbd-2019/data-input-sources)).

## 192 **GBD Methods and Tools**

193 The GBD details are reported elsewhere (21). Diseases and injuries within the GBD were  
194 organized into levels: Level 1 being the broadest causes of death and disability to Level 4 being  
195 the most specific. Within the three Level 1 causes (communicable, maternal, neonatal, and  
196 nutritional diseases; non-communicable diseases; and injuries), there were 174 Level 3 causes.  
197 The GBD 2019 study has estimated the burden of disease, including LRIs, for Ethiopia's national  
198 and subnational states. LRIs comprise diseases of the lower airways such as pneumonia, bronchitis,  
199 and bronchiolitis, among others (2). LRI mortality was estimated by age, sex, geography, and year  
200 using a modelling platform called the Cause of Death Ensemble model. LRI morbidity, including  
201 incidence, was modelled using a meta-regression platform known as DisMod-MR, a Bayesian,  
202 hierarchical, mixed-effects meta-regression platform (22). Years of life lost (YLLs) were  
203 computed by multiplying cause-specific deaths by the life expectancy at the age of death (23, 24).  
204 Population risk assessments over time and among risks were estimated using the comparative risk  
205 assessment approach developed for the GBD study (25, 26). The GBD risk factors were  
206 categorized as follows: Level 1 risk factors are behavioural, environmental, occupational, and

207 metabolic; Level 2 risk factors include 20 clusters of risks; Level 3 consists of 52 clusters of risks;  
208 and Level 4 contains 69 specific risk factors (21).

## 209 **Presentation of results**

210 We present the burden of LRIs in Ethiopia and its regional states using incidence, deaths, and  
211 YLLs categorized by sex, age groups, and year. We used numbers, rates, and percent change for  
212 the quantification of the burden. We also estimated the risk factors contributing to LRIs in Ethiopia  
213 and the percent change between 1990 and 2019. We reported GBD causes and risk factors using  
214 level 3 classifications, with 95% Uncertainty Intervals (UI). Additional tables and figures are  
215 attached in the supplementary appendix.

## 216 **Patient and public involvement**

217 Patients and the public were not involved in this study.

## 218 **RESULTS**

### 219 **Morbidity Due to LRIs**

220 In 2019, an estimated 6,628,673.6 (95% UI: 6,108,786.2–7,230,986.3) new cases of LRIs occurred  
221 in Ethiopia resulting in an age-standardized incidence rate of 8313.7 per 100,000 people (7757.6–  
222 8918). Out of the total LRI episodes, 22% (1,448,680.0 new cases [1,150,089.8–1,799,704.4]) of  
223 new cases occurred among children younger than 5 years, yielding an annual incidence rate of  
224 8685.0 per 100,000 children (6895.1–10,789.8). In adults older than 70 years, there were 725,273.3  
225 (640,315.4–837,746.3) new cases of LRIs with an annual incidence of 38,394.4 per 100,000 people  
226 (33,896.9–44,348.5) (Appendix Table 1 and Table 2).

1  
2  
3 227 Compared to national estimates, a significantly lower age-standardized incidence rate of LRIs per  
4  
5 228 100,000 people was observed in the chartered cities (6788.1 [6285.1–7339.1] in Addis Ababa,  
6  
7 229 7148.8 [6634.6–7750.7] in Dire Dawa), and in Harari region (7190.5 [6684.1–7718.6]). The  
8  
9 230 highest rates of age-standardized incidence per 100,000 people were observed in Afar (9350.2  
10  
11 231 [8648.8–10,157.4]), Somali (9220.0 [8515.9–10,046.4]), and Benishangul-Gumuz (9054.6  
12  
13 232 [8394.2–9766.0]) although not significant compared to the national estimate (Figure 1; Figure 2;  
14  
15 233 Appendix Table 2).

16  
17  
18 234 In children younger than 5 years, the lowest incidence rates were observed in Addis Ababa (4927.2  
19  
20 235 [3812.5–6231.8]), Harari (6821.6 [5373.5–8607.3]), and Gambella (6791.1 [5370.4–8460.1]) per  
21  
22 236 100,000 people, substantially below the national estimate. The highest incidence of LRIs per  
23  
24 237 100,000 children were recorded in Benishangul-Gumuz (10,481.8 [8269.5–13,219.0]), Somali  
25  
26 238 (10,062.7 [7949.6–12,802.8]), Afar (9365.5 [7421.7–11,714.7]), and Oromia (9039.4 [7080.5–  
27  
28 239 11,277.7]).

29  
30  
31  
32  
33  
34 240 The age-standardized decline rate between 1990 and 2019 was 39% for both sexes, and it was 56%  
35  
36 241 in under-five children and 13% in adults older than 70. The lowest decline in age-standardized  
37  
38 242 incidence rate was in Somali (19%); while it was between 38% and 44% for the remaining regions  
39  
40 243 (Appendix Table 2).

41  
42  
43 244 In children younger than 5, the incidence rates increased slightly between 1990 and 1995, except  
44  
45 245 in Addis Ababa and Amhara region. The highest decline rates were found between the years 2005  
46  
47 246 and 2015 across all regions (Appendix Figure 1).

## 51 247 **Mortality due to LRIs**

52  
53  
54  
55  
56  
57  
58  
59  
60

1  
2  
3 248 In 2019, LRIs caused 46,300.7 (95% UI: 39,515–54,642) deaths in Ethiopia, giving the age-  
4  
5 249 standardized mortality rate of 86.4 (75.3–97.6) per 100,000 people. Under-five mortality accounted  
6  
7  
8 250 for 42% (19,591.8 [14,018.4–26,899.0]) of all deaths due to LRIs which resulted in a mortality  
9  
10 251 rate of 117.4 (84.0–161.2) per 100,000 children. Of the under-five deaths, 71% (13,919.0 [9946.0–  
11  
12 252 18,860.0]) occurred in the first year of life. In adults older than 70 years, LRIs caused 14,627.6  
13  
14 253 (12,393.7–16,892.8) deaths, which was a mortality rate of 774.3 (656–894.2) deaths per 100,000  
15  
16 254 adults (Table 1; Appendix Table 3).

17  
18  
19 255 In 2019, the number of deaths in all age groups by region were highest in Oromia (18,206 [15,193–  
20  
21 256 21745]), Amhara (9525 [7530–11872]), SNNP (9494 [7713–11649]), and Somali (3907.5  
22  
23 257 [3007.4–4959.4]), followed by Tigray (2551.4 [2090.3–3028.6]), Afar (706.2 [567.7–869.6]),  
24  
25 258 Benishangul-Gumuz (619 [470.7–803.0]), Dire Dawa (154.6 [120.6–193.8]) and Gambella (123.2  
26  
27 259 [98.2–151.9]). Harari (93.1 [73.8–116.0]) had the lowest number of deaths. (Appendix Table 3).

28  
29  
30 260 Between 1990 and 2019, the age-standardized mortality rate declined by 61%, and the decline in  
31  
32 261 under-five children and adults over 70 years was 86% and 30%, respectively (Table 1).

262 *Table 1: Lower Respiratory Infections mortality rates and percentage changes between 1990 and 2019 in Ethiopia, both sexes, with different age*  
 263 *groups*

|             | Age standardized                         |                                          |           | Children younger than 5                    |                                            |           | People older than 70                     |                                          |           |
|-------------|------------------------------------------|------------------------------------------|-----------|--------------------------------------------|--------------------------------------------|-----------|------------------------------------------|------------------------------------------|-----------|
| Location    | Deaths per 100 000 people [95% UI], 1990 | Deaths per 100 000 people [95% UI], 2019 | Change, % | Deaths per 100 000 children [95% UI], 1990 | Deaths per 100 000 children [95% UI], 2019 | Change, % | Deaths per 100 000 people [95% UI], 1990 | Deaths per 100 000 people [95% UI], 2019 | Change, % |
| Addis Ababa | 163.4[134.6-206.9]                       | 59.4[49.8-71.4]                          | 64        | 441.5[320.4-602.7]                         | 23.4[14.1-36.4]                            | 95        | 909.2[669.5-1264.6]                      | 503.6[410.5-633.7]                       | 45        |
| Oromia      | 241.3[188.5-292.8]                       | 89.3[75.9-103.1]                         | 63        | 920.7[629.5-1264.1]                        | 122.3[84.8-171]                            | 87        | 1174.1[842.8-1543]                       | 849.5[687.3-1009]                        | 28        |
| Amhara      | 197.7[163.5-236.5]                       | 74.3[59.4-91]                            | 62        | 691.3[531.7-883.4]                         | 94.9[55.6-146.1]                           | 87        | 1017.9[755.4-1324]                       | 682.7[537.4-857.9]                       | 33        |
| SNNPs       | 243.7[196.4-296.9]                       | 98.9[83.8-116.6]                         | 59        | 971.9[697.2-1273.2]                        | 118.4[79-168.5]                            | 88        | 1161.3[584.7-822.3]                      | 845.4[685.6-018.1]                       | 28        |
| Tigray      | 242.7[200.5-292]                         | 84.6[69.2-100.1]                         | 65        | 780.4[593.5-1009.1]                        | 67.2[43.5-98.3]                            | 92        | 1166.7[838.2-1586]                       | 788.6[637.9-956.8]                       | 33        |
| Harari      | 240.2[182.6-303.1]                       | 77[63-92.5]                              | 68        | 1146.7[730-1604.1]                         | 89.9[51.1-138]                             | 93        | 762.3[412-1223.7]                        | 694.3[551.9-849]                         | 9         |
| Afar        | 244.8[186.5-316.9]                       | 103.7[86.6-122.6]                        | 58        | 723.7[481.5-1023.7]                        | 101.7[65-152.4]                            | 86        | 1010[658-1541.7]                         | 917.6[720.6-146.8]                       | 10        |
| Somali      | 147.6[113.8-192.6]                       | 97.5[79.2-118.6]                         | 34        | 455.9[313-628.5]                           | 197.3[135-279.8]                           | 57        | 798.8[519.2-1177.6]                      | 765.1[588.8-972.4]                       | 5         |
| BG          | 284.1[221.8-358.1]                       | 101.8[84-121.7]                          | 64        | 1266.4[846.7-790.9]                        | 215.1[141.4-311]                           | 84        | 975.3[656.5-1379.3]                      | 671.9[532.7-848.7]                       | 32        |
| Dire Dawa   | 220.1[171.6-270.9]                       | 69.9[56.5-84]                            | 68        | 1084.2[689.1-503.2]                        | 83.7[44.7-135.9]                           | 93        | 868.7[604.5-1205.5]                      | 621.3[496.4-766.1]                       | 29        |
| Gambella    | 231.5[176.8-297.4]                       | 82.4[68.3-97.1]                          | 64        | 1265.5[805.4-764.3]                        | 57[32.4-89.6]                              | 96        | 739.6[477.7-1074.9]                      | 678.3[540.4-835.3]                       | 9         |
| Ethiopia*   | 223[184.7-264.3]                         | 86.4[75.3-97.6]                          | 61        | 822.2[635-1051.2]                          | 117.4[84-161.2]                            | 86        | 1092.3[844-1391.5]                       | 774.3[656-894.2]                         | 30        |

N.B: all changes are in decreasing percent. SNNPs: Southern Nations, Nationalities, and Peoples; BG: Benishangul-Gumuz; \*national estimate

265

266



267 In Ethiopia, the age-standardized mortality rate was higher among males (100.6 [84.1-121.4]) than  
268 females (71.8 [60.2–82.9]) (Appendix Table 4).

269 In 1990, the age-standardized mortality rate per 100,000 people was the highest in Benishangul-  
270 Gumuz (284.1 [221.8–358.1]), Afar (244.8 [186.5–316.9]) and SNNP (243.7 [196.4–296.9]),  
271 although it is not significantly different from the national estimate. On the other hand, the lowest  
272 age standardized mortality rate was exhibited in Somali (147.6 [113.8–192.6]). Although the value  
273 was not significantly different from the national value in 1990, Addis Ababa showed the second  
274 lowest age-standardized mortality rate (163.4 [134.6–206.9]) (Table 1).

275 In 2019, the age-standardized mortality rate per 100,000 people was significantly lower in Addis  
276 Ababa (59.4 [49.8–71.4]) when compared to other regions, although not significantly lower than  
277 Gambella and other urban areas (Harari and Dire Dawa). Dire Dawa showed a significantly lower  
278 age-standardized mortality rate when compared to Benishangul-Gumuz, Afar, and SNNP.  
279 Compared to the national estimate, the regions of Afar (103.7 [86.6–122.6]) and Benishangul-  
280 Gumuz (101.8 [84.0–121.7]) recorded the highest age-standardized mortality rates per 100,000  
281 people, although the difference is not statistically significant (Table 1). Compared to the 1990s,  
282 there was a 58% to 68% decrease in the age-standardized mortality rates across all regions.  
283 However, the Somali region recorded a 34% reduction in mortality rates (Table 1 and Figure 3).

284 Among children below the age of 5, the mortality rate per 100,000 people was significantly lower  
285 in Addis Ababa (23.4 ([14.1–36.4]) than other regions, although it was not significantly less than  
286 Gambella in 2019. The mortality rate was the highest in Benishangul-Gumuz (215.1 [141.4–  
287 311.0]), Somali (197.3 [135.2–279.8]), and Oromia (122.3 [84.8–171.0]) despite being not  
288 significantly higher than the national estimate (Table 1). Dire Dawa showed a significantly lower  
289 mortality rate than Benishangul-Gumuz and Somali. Harari had a significantly lower mortality rate

1  
2  
3 290 than Benishangul-Gumuz. For all regions, the mortality rate declined for children younger than 5-  
4  
5 291 years between 1990 and 2019 by between 84% (in Benishangul-Gumuz) and 96% (in Gambella),  
6  
7  
8 292 except in Somali, which showed a 57% decline (Table 1). The mortality rate increased slightly  
9  
10 293 between 1990 and 1995 and between 2010 and 2015 in Somali region (Appendix Figure 2).

11  
12  
13 294 The mortality rate in adults older than 70 was the lowest in Addis Ababa (503.6 [410.5–633.7]).  
14  
15 295 Other regions and cities have not shown a statistically significant difference from the national  
16  
17  
18 296 estimate. The decline in mortality rates between 1990 and 2019 is below 50% across all regions  
19  
20 297 (Table 1). The mortality rate increased in Afar and Somali between 2005 and 2019 and in Gambella  
21  
22 298 between 1990 and 2005 (Appendix Figure 3).

### 25 299 **Premature Mortality due to LRIs**

26  
27  
28  
29 300 In 2019, premature death due to LRIs was 2,445,093.7 (95% UI: 1,934,420.8–3,119,838.6) YLLs,  
30  
31 301 yielding an age-standardized rate of 2404.5 per 100,000 people (2059.4–2833.3). Compared to  
32  
33  
34 302 1990, the age-standardized YLL rate declined by 76% in 2019. In parallel, 70% of all premature  
35  
36 303 mortality occurred in children younger than five, which accounted for 1,721,122.3 (1,231,032.1–  
37  
38 304 2,362,958.7) YLLs. The YLL rate of 72,055.4 (55,718.5–92,064) per 100,000 under-five children  
39  
40 305 in 2019 declined by 86% compared to the YLL rate in 1990. Adults over 70 years contributed 8%  
41  
42  
43 306 of all YLLs due to LRIs (194,756.2 [165,462.0–225,502.1]), yielding a rate of 10,309.9 (8759.2–  
44  
45 307 11,937.6) YLLs per 100,000 people (Table 2; Appendix Table 5 and Table 6).

46  
47  
48 308 Compared to 1990, the number of YLLs has decreased by 70% in all age groups and by 76% in  
49  
50 309 children younger than five in 2019. However, the number of YLLs has increased by 45% in adults  
51  
52  
53 310 older than 70 (Appendix Table 5).

1  
2  
3 311 The age-standardized YLL rate was significantly lower in Addis Ababa (1285.6 [1065–1561.8])  
4  
5 312 in 2019 compared to the national average. The highest age standardized YLL rate were in  
6  
7 313 Benishangul-Gumuz (3571.1 [2772.4–4510.7]), Somali (3236.4 [2537.4–4006]), and Afar (2824.6  
8  
9 314 [2323–3414]), although not statistically significant compared to the national estimate (Table 2).  
10  
11  
12  
13 315 In children younger than five years, Addis Ababa (2069 [1253–3217.5]) had a significantly lower  
14  
15 316 YLL rate than the national estimate. The YLL rate was observed to be the lowest in Gambella  
16  
17 317 (5031.8 [2867.2–7885.7]), although not significantly lower than the national estimate (Table 2).  
18  
19  
20  
21 318

319 *Table 2: Lower Respiratory Infections YLL rates and percentage changes between 1990 and 2019 in Ethiopia, both sexes, with different age*  
 320 *groups*

| Location    | Age-standardized             |                              |           | Children younger than 5 years |                              |           | People older than 70         |                              |           |
|-------------|------------------------------|------------------------------|-----------|-------------------------------|------------------------------|-----------|------------------------------|------------------------------|-----------|
|             | YLL per 100,000 people, 1990 | YLL per 100,000 people, 2019 | Change, % | YLL per 100,000 people, 1990  | YLL per 100,000 people, 2019 | Change, % | YLL per 100,000 people, 1990 | YLL per 100,000 people, 2019 | Change, % |
| Addis Ababa | 6362.2(5161.9-7847.9)        | 1285.6(1065-1561.8)          | 80        | 38824.7(28230.1-53092.4)      | 2069(1253-3217.5)            | 95        | 13587(9985.4-18978.3)        | 6857.1(5545.8-8721.2)        | 50        |
| Oromia      | 11217.6(8517-14318)          | 2433.8(2042.2-2879.5)        | 78        | 80610.7(55103.7-110696)       | 10742.8(7456.7-15039.6)      | 87        | 18754.2(13297.1-24843)       | 11119.7(8939.1-13305)        | 41        |
| Amhara      | 8690.4(7146.3-10453.8)       | 2016.4(1551.4-2541.8)        | 77        | 60663.3(46712.5-77511.5)      | 8355(4898.9-12845)           | 87        | 15950.4(11723.4-21059.7)     | 9059.7(7063.2-11529.2)       | 44        |
| SNNPs       | 11633(9119.4-14477.9)        | 2698.1(2243.5-3250.2)        | 77        | 85114.7(61203.2-111502.1)     | 10409.3(6968.1-14819.3)      | 88        | 18842.6(13166.1-26081)       | 11736.6(9426.7-14238.6)      | 38        |
| Tigray      | 10346.4(8522.9-12340.3)      | 1977.1(1593.9-2395)          | 81        | 68509.3(52185.7-88712.2)      | 5927.9(3839.4-8676.8)        | 92        | 19502.8(13914.1-26751.2)     | 10486.8(8439.5-12765.3)      | 47        |
| Harari      | 12826.5(9336.5-16985.4)      | 2060.4(1595.6-2623.1)        | 84        | 100421.7(63898.7-140467.8)    | 7922.5(4518.7-12117.2)       | 93        | 11782.6(6360.4-19341.1)      | 9260.4(7338.7-11340.3)       | 22        |
| Afar        | 10993.5(8520.8-14193.6)      | 2824.6(2323-3414)            | 74        | 63570.5(42296.6-89769)        | 8943.7(5734.6-13390.2)       | 86        | 16925.5(10923.7-26001.7)     | 11867.1(9346-14716.9)        | 30        |
| Somali      | 6286.9(4860.5-7970)          | 3236.4(2537.4-4006)          | 49        | 40088.1(27543.7-55109)        | 17314.3(11890.7-24530)       | 57        | 11953.6(7599.2-17885.5)      | 10246(7797.8-13150.6)        | 15        |
| BG          | 14965.1(11197.4-19998.6)     | 3571.1(2772.4-4510.7)        | 76        | 110847.2(74368-156588.4)      | 18868.3(12442.9-27281.8)     | 83        | 16397.3(10917-23228.5)       | 9541.9(7476.9-12112.3)       | 42        |
| Dire Dawa   | 11749.7(8605.4-15249.5)      | 1832.8(1407.3-2363.1)        | 84        | 94905.3(60458.5-131584.5)     | 7371.3(3953-11962.1)         | 93        | 13207.9(9219.6-18328.2)      | 8371(6616.3-10408.2)         | 37        |
| Gambella    | 13175.8(9291-17411)          | 1937.4(1567.6-2344.6)        | 85        | 110783.8(70576-154304.1)      | 5031.8(2867.2-7885.7)        | 96        | 11811.4(7673.5-17012.5)      | 10030.9(7730.2-12664.9)      | 16        |
| Ethiopia*   | 10189.1(8347.5-12201.8)      | 2404.5(2059.4-2833.3)        | 76        | 72055.4(55718.5-92064)        | 10318.6(7380.4-14166.6)      | 86        | 17415.9(13362.7-22228.5)     | 10309.9(8759.2-11937.6)      | 41        |

321 SNNPs: Southern Nations, Nationalities, and Peoples; BG: Benishangul-Gumuz; \*national estimate

322

1  
2  
3 323 The age-standardized premature mortality rate between 1990 and 2019 showed a continuous  
4  
5 324 decline in all regions, except Somali. Benishangul-Gumuz showed the highest burden between  
6  
7  
8 325 1990 and 2019 (Figure 4).  
9

10  
11 326 The change in premature mortality in children younger than five was significant throughout the  
12  
13 327 years. However, the reduction in premature mortality among adults older than 70 was not as  
14  
15 328 significant (Appendix Figure 4 and Figure 5).  
16  
17

### 18 329 **Risk Factors**

20  
21  
22 330 Across all population groups, about half (48%) of the mortalities (measured in rates) due to LRIs  
23  
24 331 in Ethiopia were attributed to household air pollution from solid fuel. In addition, lack of access  
25  
26 332 to a hand-washing facility (23%), childhood wasting (23%), low birth weight (9%), short gestation  
27  
28 333 period (7%), and ambient particulate matter pollution (6%) were also risk factors for mortality due  
29  
30 334 to LRIs. The contribution of the risk factors to death due to LRIs in all regions was similar to the  
31  
32 335 national estimate, except in Addis Ababa, where lack of access to hand-washing facilities, ambient  
33  
34 336 particulate matter pollution, and low temperature were the main contributing factors. Ambient  
35  
36 337 particulate matter pollution was also relatively higher in Dire Dawa, Harari, and Tigray regions  
37  
38 338 (Appendix Figure 6).  
39  
40  
41  
42

43 339 In children younger than five, more than three-fourths of deaths due to LRIs were attributed to  
44  
45 340 childhood wasting (54%) stunting (12%), and child underweight (10%) in Ethiopia. In addition,  
46  
47 341 50% of the LRIs mortalities were attributed to household air pollution from solid fuel. Lack of  
48  
49 342 access to hand-washing facilities (23%), low birth weight (23%), short gestation period (17%),  
50  
51 343 high (4%) or low temperature (4%), absence of exclusive breastfeeding (4%) were also the risk  
52  
53 344 factors with evident contribution. The distribution of risk factors varied among the regions. Child  
54  
55  
56  
57  
58  
59  
60

1  
2  
3 345 wasting, low birth weight, and pre-term birth were the contributing factors of mortality in Addis  
4  
5 346 Ababa. In Harari and Dire Dawa, child wasting, lack of access to hand-washing facilities, pre-term  
6  
7 347 birth, and household air pollution from solid fuels contributed more to the death from LRIs than  
8  
9 348 the other risk factors in 2019. All the risk factors except for ambient particulate air matter and low  
10  
11 349 temperature were the highest in Somali and Benishangul-Gumuz (Appendix Figure 7).  
12  
13  
14

## 15 350 **Discussion**

16  
17  
18  
19 351 The findings from this study indicate that although the burden of LRIs, measured in incidence or  
20  
21 352 mortality rates, have shown a significant decline, they are still the third leading cause of death after  
22  
23 353 neonatal disorders and diarrheal diseases in 2019 in Ethiopia. Cities and predominantly urban areas  
24  
25 354 had lower mortality rates than predominantly pastoralist regions of the country. The rate of decline  
26  
27 355 in mortality between 1990 and 2019 varied slightly across regions and chartered cities. The  
28  
29 356 mortality rate decreased by more than three-fourths among children under the age of five and only  
30  
31 357 by one-third among adults older than 70 between 1990 and 2019. Half of LRIs mortalities are  
32  
33 358 attributed to household air pollution from solid fuels in all age groups. About three-fourths of LRIs  
34  
35 359 in children were attributed to malnutrition.  
36  
37  
38  
39

40 360 The mortality rate of LRIs among children below the age of 5 has declined by 86% between 1990  
41  
42 361 and 2019. This decline could be attributed to improvements in living conditions, access to  
43  
44 362 healthcare, and immunization. The national health delivery infrastructure has grown from 2,600  
45  
46 363 health facilities in 1997 to 21,154 facilities, including 314 hospitals, 3,678 health centers, and  
47  
48 364 17,162 health posts and private health facilities in 2019. As a result, the health workforce has  
49  
50 365 increased from 46,000 in 2007 to 159,545 in 2019 (16). The introduction of HEP since 2004 to  
51  
52 366 provide preventive, health promotion, and curative treatment for pneumonia, malaria and diarrhoea  
53  
54  
55  
56  
57  
58  
59  
60

1  
2  
3 367 had improved health outcomes for children (14). Moreover, Ethiopia has been implementing  
4  
5 368 holistic child health improvement programs like IMCI since 1997 (15) and ICCM (5). Vaccination  
6  
7  
8 369 against *Streptococcus pneumoniae*, which is responsible for about half of the LRIs mortality in  
9  
10 370 African countries, with the PCV 10 vaccine since 2011 helped reduce the burden of LRIs (4). In  
11  
12 371 addition, improved socioeconomic conditions have supported the reduction of the burden of LRIs  
13  
14  
15 372 in the country (27).

16  
17  
18 373 Despite the achievements reached in improving child health outcomes in Ethiopia, children are  
19  
20 374 still disproportionately affected by LRIs. Out of the total burden of LRIs, 42% of all the deaths  
21  
22 375 were among children younger than five. In that regard, this study has shown that one out of ten  
23  
24 376 child deaths are due to LRIs. However, another study estimated that pneumonia alone shared about  
25  
26  
27 377 17% of all deaths in children younger than five years (28). Among children under five, children  
28  
29 378 younger than one carry the highest burden of LRIs. Furthermore, the mortality rate among children  
30  
31 379 younger than one (397.7 per 100,000 people) was more than nine times higher than that of children  
32  
33  
34 380 between one and four years old (43 per 100,000 people). Although most studies on the high burden  
35  
36 381 of LRIs corroborate our findings, the findings from Global Health Observatory (GHO) estimated  
37  
38 382 a much higher mortality rate than the estimates of this study (i.e. 481.9 in children less than one  
39  
40  
41 383 year and 51.1 per 1000,000 population in children between one and four years) (8). Although we  
42  
43 384 could not explain why this variation occurs, the estimates from GBD are also less than the estimate  
44  
45 385 from findings of the Child Health Epidemiology Reference Group (CHERG), which is primarily  
46  
47  
48 386 due to the difference in the types of data used (29).

49  
50 387 Urban areas of the country, mainly Addis Ababa and Dire Dawa, had significantly lower mortality  
51  
52 388 rates than pastoralist areas such as Benishangul-Gumuz and Somali. These regional variations  
53  
54  
55 389 could be attributed to gaps in availability and access to healthcare and socioeconomic status

1  
2  
3 390 differences among the subnational states. A previously conducted study indicated that disease  
4  
5 391 burden is high among people in the poorest wealth quintile and people located mainly in Afar,  
6  
7 392 Somali, Oromia, SNNP, and Benishangul-Gumuz and also have the lowest level of health service  
8  
9 393 utilization (30). The rural area of the country has less healthcare coverage and utilization than the  
10  
11 394 urban areas. The coverage of all basic vaccination is 43% in the country. Across the regions, the  
12  
13 395 coverage of all basic vaccination is lowest in Afar (20%) and highest in Addis Ababa (83%).  
14  
15 396 Coverage of pentavalent vaccines in children is 72% among the urban population while it is 56%  
16  
17 397 among the rural population (15, 28). There is a variation in the performance of immunization  
18  
19 398 across regions. Addis Ababa, Ethiopia's capital has PCV3 coverage of 93% among 1-year-olds in  
20  
21 399 2019, whereas this coverage is only 23% in Afar and Somali. The wasting rate in Somali was 21%  
22  
23 400 in children under five, while it was just 2% in Addis Ababa in 2019 (31)

24  
25  
26  
27  
28  
29 401 In addition to children, LRIs affects people older than 70 years. The number of people dying from  
30  
31 402 LRIs increased over the years in people older than 70 years, partly due to the increase in the aging  
32  
33 403 population. However, the mortality rate declined by 30% between 1990 and 2019 (3, 32). The  
34  
35 404 incidence rate did not show a significant improvement across the study years, showing only 15%  
36  
37 405 reductions between 1990 and 2019. Among the regions, Somali and Afar have recorded an  
38  
39 406 increased incidence rate between 1990 and 2019. This could partly be explained by poor  
40  
41 407 accessibility and availability of health facilities in the regions (31).

42  
43  
44  
45 408 Wasting, stunting, and underweight were major risk factors contributing to the death of children  
46  
47 409 younger than five years due to LRIs (33-35). More than 37% of children under five are stunted,  
48  
49 410 with a higher percentage in rural areas (41%) than in urban areas (26%). Similarly, the prevalence  
50  
51 411 of child underweight and wasting is 21% in the rural and 7% in the urban parts of Ethiopia (36).  
52  
53 412 This indicates that more investment is needed to reduce the burden on malnutrition among children  
54  
55  
56  
57  
58  
59  
60



1  
2  
3 413 and in the rural parts of the country to attain better health outcomes, protecting against LRIs.  
4  
5 414 Although the prevalence of stunting, wasting, and underweight has decreased markedly over time,  
6  
7 415 they are still major risk factors for death caused by LRIs. In the Millennium Development Goals  
8  
9 416 (MDG) era, between 1990 and 2015, about half of the deaths averted due to LRIs were attributed  
10  
11 417 to improvement in the nutritional status of children (reduction in wasting and stunting) (15).  
12  
13  
14

15 418 Ambient particulate matter and household air pollution from solid fuel use were the two essential  
16  
17 419 components of air pollution. Household air pollution from solid fuel use the was the second  
18  
19 420 leading risk factor for LRIs, and ambient particulate matter is the eight leading risk factor among  
20  
21 421 the top ten risk factors for LRIs (37-39). This indicates that improvement in socio-demographic  
22  
23 422 factors will have a more substantial contribution as the use of electricity and natural gas for cooking  
24  
25 423 increases (3).  
26  
27  
28  
29

30 424 To reduce the burden of LRIs, both national and global efforts are underway. The Global Action  
31  
32 425 Plan for the Prevention and Control of Pneumonia and Diarrhoea (GAPPD), established by the  
33  
34 426 World Health Organization, set goals in 2013 to reduce child LRI mortality rates to below 3 in  
35  
36 427 1,000 live births and to reduce severe LRI incidence by 75% of the 2010 baseline by 2025. To  
37  
38 428 achieve these goals, reaching 90% of children with full-dose vaccine coverage, 90% access to  
39  
40 429 pneumonia treatment, 50% coverage of exclusive breastfeeding in the first six months, and  
41  
42 430 exclusive breastfeeding promotion were set as prerequisites (17). However, a 6% average annual  
43  
44 431 mortality reduction was recorded between 2000 and 2018 in Ethiopia. With this, the country can  
45  
46 432 only reach the 2025 GAPPD target in 2035, ten years behind the target, according to the Maternal  
47  
48 433 and Child Epidemiology Estimation Group (MICE) estimation (28).  
49  
50  
51  
52

53 434 Ethiopia's major health sector strategic plan, the Health Sector Transformation Plan-2 (HSTP-2)  
54  
55 435 for the year 2021-2024, aims to reduce the infant mortality rate to 35, the neonatal mortality rate  
56  
57  
58  
59  
60

1  
2  
3 436 to 21 and the children under-5 mortality rate to 43 per 1,000 live births. Similarly, the 2030  
4  
5 437 Sustainable Development Goals (SDG) has set targets to reduce childhood mortality significantly.  
6  
7 438 These targets can be achieved if the country implements high-impact priority curative and  
8  
9 439 preventive interventions against LRIs (40). To achieve this, concerted action to improve policies,  
10  
11 440 increase investment, foster innovations, and scale-up evidence-based interventions has paramount  
12  
13 441 importance. Parallel to this, an estimated \$274 billion for health is required to achieve the health-  
14  
15 442 related SDGs by 2030 in 67 low and middle-income countries, including Ethiopia. One of the  
16  
17 443 strategies to mobilize the needed resources is to increase government expenditure by 15% and  
18  
19 444 share the population's costs through taxes or insurances (41).  
20  
21  
22  
23

24 445 This study is not without limitations; limitations in the GBD methods also apply to this study. One  
25  
26 446 of the limitations is the incompleteness of data. A previously conducted study showed that most  
27  
28 447 countries in Africa, including Ethiopia, have had a vast amount of incomplete vital records data  
29  
30 448 (42). This increases the uncertainty in the estimates, which might compromise the accuracy of the  
31  
32 449 findings and reduce the use of these findings for policy decision-making (1). However, to improve  
33  
34 450 the quality of the estimates, the best available data are used and GBD estimates are continuously  
35  
36 451 updated.  
37  
38  
39  
40

## 41 452 **Conclusion**

42  
43  
44  
45 453 Despite the substantial reduction in morbidity and mortality at national and regional states, LRIs  
46  
47 454 still remain one of the leading causes of the burden of disease in Ethiopia. Children and elders are  
48  
49 455 still disproportionately affected by LRIs. The burden of illness and death due to LRIs varies across  
50  
51 456 regional states in Ethiopia, with lower rates in cities and predominantly urban areas while  
52  
53 457 predominantly pastoralist areas of the country have higher rates. Efforts should be made to tackle  
54  
55  
56  
57  
58  
59  
60

1  
2  
3 458 the major risk factors contributing to death by LRIs. Improving child nutrition, access to  
4  
5 459 immunization and curative health services, as well as universal electrification to reduce indoor air  
6  
7 460 pollution will be very useful strategies to reduce deaths due to LRIs in Ethiopia. Furthermore,  
8  
9  
10 461 improvement in socioeconomic factors will also help to reduce LRI burden at national and regional  
11  
12 462 levels. To reach the targets set at the national and international level, mobilizing resources to health  
13  
14 463 and improving the provision of health services to the community according to the needs of the  
15  
16  
17 464 regions is of paramount importance.

### 20 465 **List of abbreviations**

21  
22  
23 466 EPHI: Ethiopian Public Health Institute; GAPPD: Global Action Plan for the Prevention and  
24  
25 467 Control of Pneumonia and Diarrhoea GBD: Global Burden of Disease; GHO: Global Health  
26  
27 468 Observatory; HSTP: Health Sector Transformation Plan; ICCM: integrated community case  
28  
29 469 management; IHME: Institute of Health and Metric Evaluation; LRIs: Lower Respiratory  
30  
31 470 Infections; NDMC: National Data Management Center for health; PCV: Pneumococcal Conjugate  
32  
33 471 Vaccine; SDG: Sustainable Development Goals; SNNPs: Southern Nations, Nationalities and  
34  
35 472 Peoples; UI: Uncertainty Interval; WHO: World Health Organization; YLL: Years of Life Lost.

### 40 473 **Ethics approval and consent to participate**

41  
42 474 This manuscript was produced as part of the GBD Collaborator Network and in accordance with  
43  
44 475 the GBD Protocol.

### 48 476 **Consent for publication**

49  
50 477 Not applicable.

### 54 478 **Availability of data and material**

1  
2  
3 479 All relevant data are submitted with this manuscript.  
4  
5

6  
7 480 **Competing interests**

8  
9 481 The authors declare that they have no competing interests.  
10

11 482 **Funding**

12  
13 483 Bill and Melinda Gates Foundation has funded Ethiopia subnational burden of disease EPHI-  
14  
15 484 IHME collaborative initiative. The funder of this study had no role in study design, data collection,  
16  
17 485 data analysis, data interpretation, or the writing of the report.  
18  
19  
20

21 486 **Authors' contributions**

22  
23 487 Please see appendix section C for more detailed information about individual author contributions  
24  
25 488 to the research, divided into the following categories: providing data or critical feedback on data  
26  
27 489 sources; developing methods or computational machinery; providing critical feedback on methods  
28  
29 490 or results; drafting the manuscript or revising it critically for important intellectual content; and  
30  
31 491 managing the estimation or publications process  
32  
33  
34  
35

36 492 **Declarations**

37  
38 493 M A Gebremichael reports support for the present manuscript from the Bill and Melinda Gates  
39  
40 494 Foundation.  
41  
42  
43

44 495 **Acknowledgements**

45  
46 496 The authors have no acknowledgements to declare  
47  
48  
49

50 497 **References**

51  
52 498 1. Global, regional, and national age-sex specific mortality for 264 causes of death, 1980-  
53  
54 499 2016: a systematic analysis for the Global Burden of Disease Study 2016. Lancet (London,  
55  
56  
57  
58  
59  
60

- 1  
2  
3 500 England). 2017 Sep 16;390(10100):1151-210. PubMed PMID: 28919116. Pubmed Central  
4  
5 501 PMCID: PMC5605883. Epub 2017/09/19. eng.
- 6  
7  
8 502 2. Troeger C, Blacker B, Khalil IA, Rao PC, Cao J, Zimsen SRM, et al. Estimates of the  
9  
10 503 global, regional, and national morbidity, mortality, and aetiologies of lower respiratory infections  
11  
12 504 in 195 countries, 1990&#x2013;2016: a systematic analysis for the Global Burden of Disease  
13  
14 505 Study 2016. *The Lancet Infectious Diseases*. 2018;18(11):1191-210.
- 15  
16  
17 506 3. Moradi-Lakeh M, El Bcheraoui C, Charara R, Khalil I, Afshin A, Kassebaum NJ, et al.  
18  
19 507 Burden of lower respiratory infections in the Eastern Mediterranean Region between 1990 and  
20  
21 508 2015: findings from the Global Burden of Disease 2015 study. *International Journal of Public*  
22  
23 509 *Health*. 2018 2018/05/01;63(1):97-108.
- 24  
25  
26 510 4. Reiner RC, Welgan CA, Casey DC, Troeger CE, Baumann MM, Nguyen QP, et al.  
27  
28 511 Identifying residual hotspots and mapping lower respiratory infection morbidity and mortality in  
29  
30 512 African children from 2000 to 2017. *Nature Microbiology*. 2019 2019/12/01;4(12):2310-8.
- 31  
32  
33 513 5. Miller NP, Amouzou A, Tafesse M, Hazel E, Legesse H, Degeffie T, et al. Integrated  
34  
35 514 community case management of childhood illness in Ethiopia: implementation strength and quality  
36  
37 515 of care. *Am J Trop Med Hyg*. 2014;91(2):424-34. PubMed PMID: 24799369. Epub 05/05. eng.
- 38  
39  
40 516 6. Alamneh YM, Adane F. Magnitude and Predictors of Pneumonia among Under-Five  
41  
42 517 Children in Ethiopia: A Systematic Review and Meta-Analysis. *Journal of Environmental and*  
43  
44 518 *Public Health*. 2020 2020/05/30;2020:1606783.
- 45  
46  
47 519 7. Wondimu A, Cao Q, Wilschut JC, Postma MJ. Factors associated with the uptake of newly  
48  
49 520 introduced childhood vaccinations in Ethiopia: the cases of rotavirus and pneumococcal conjugate  
50  
51 521 vaccines. *BMC Public Health*. 2019 2019/12/10;19(1):1656.
- 52  
53  
54  
55  
56  
57  
58  
59

- 1  
2  
3 522 8. Gonakoti S, Osifo IF. Protein-Energy Malnutrition Increases Mortality in Patients  
4  
5 523 Hospitalized With Bacterial Pneumonia: A Retrospective Nationwide Database Analysis. *Cureus*.  
6  
7 524 2021 Jan 12;13(1):e12645. PubMed PMID: 33585131. Pubmed Central PMCID: PMC7876587.  
8  
9 525 Epub 2021/02/16. eng.
- 10  
11  
12 526 9. Yeo HJ, Byun KS, Han J, Kim JH, Lee SE, Yoon SH, et al. Prognostic significance of  
13  
14 527 malnutrition for long-term mortality in community-acquired pneumonia: a propensity score  
15  
16 528 matched analysis. *The Korean journal of internal medicine*. 2019 Jul;34(4):841-9. PubMed PMID:  
17  
18 529 30685962. Pubmed Central PMCID: PMC6610202. Epub 2019/01/29. eng.
- 19  
20  
21 530 10. Adane MM, Alene GD, Mereta ST, Wanyonyi KL. Prevalence and risk factors of acute  
22  
23 531 lower respiratory infection among children living in biomass fuel using households: a community-  
24  
25 532 based cross-sectional study in Northwest Ethiopia. *BMC Public Health*. 2020  
26  
27 533 2020/03/19;20(1):363.
- 28  
29  
30 534 11. Adane MM, Alene GD, Mereta ST, Wanyonyi KL. Effect of improved cookstove  
31  
32 535 intervention on childhood acute lower respiratory infection in Northwest Ethiopia: a cluster-  
33  
34 536 randomized controlled trial. *BMC Pediatrics*. 2021 2021/01/04;21(1):4.
- 35  
36  
37 537 12. Keleb A, Sisay T, Alemu K, Ademas A, Lingerew M, Kloos H, et al. Pneumonia remains  
38  
39 538 a leading public health problem among under-five children in peri-urban areas of north-eastern  
40  
41 539 Ethiopia. *PLOS ONE*. 2020;15(9):e0235818.
- 42  
43  
44 540 13. Ahmed KY, Page A, Arora A, Ogbo FA, Global M, Child Health Research c. Associations  
45  
46 541 between infant and young child feeding practices and acute respiratory infection and diarrhoea in  
47  
48 542 Ethiopia: A propensity score matching approach. *PLOS ONE*. 2020;15(4):e0230978.  
49  
50  
51  
52  
53  
54  
55  
56  
57  
58  
59  
60

- 1  
2  
3 543 14. Assefa Y, Gelaw YA, Hill PS, Taye BW, Van Damme W. Community health extension  
4  
5 544 program of Ethiopia, 2003–2018: successes and challenges toward universal coverage for primary  
6  
7 545 healthcare services. *Globalization and Health*. 2019 2019/03/26;15(1):24.  
8  
9  
10 546 15. Ruducha J, Mann C, Singh NS, Gemebo TD, Tessema NS, Baschieri A, et al. How Ethiopia  
11  
12 547 achieved Millennium Development Goal 4 through multisectoral interventions: a Countdown to  
13  
14 548 2015 case study. *Lancet Glob Health*. 2017;5(11):e1142-e51. PubMed PMID: 29025635. eng.  
15  
16  
17 549 16. Federal Ministry of Health. Health Sector Transformation Plan 2020/21-2024/25 (2013  
18  
19 550 EFY - 2017 EFY), Addis Ababa Ethiopia. 2020.  
20  
21 551 17. Unicef, World Health O. Ending preventable child deaths from pneumonia and diarrhoea  
22  
23 552 by 2025 : the integrated global action plan for pneumonia and diarrhoea (GAPPD) 2013. Available  
24  
25 553 from: <https://apps.who.int/iris/handle/10665/79200>.  
26  
27  
28 554 18. World B. World Bank data catalog. [Washington, D.C.]: World Bank.  
29  
30  
31 555 19. CSA. Ethiopia. central statistical agency. 2020.  
32  
33 556 20. Misganaw ANMWAMAHGZBTMWEAKJHEGTWTKDDA. Progress in health among  
34  
35 557 regions of Ethiopia, 1990-2019: a subnational country analysis for the Global Burden of Disease  
36  
37 558 Study 2019. *Lancet Lancet (London, England)*. 2022;399(10332):1322-35. English.  
38  
39  
40 559 21. Murray CJL, Aravkin AY, Zheng P, Abbafati C, Abbas KM, Abbasi-Kangevari M, et al.  
41  
42 560 Global burden of 87 risk factors in 204 countries and territories, 1990–2019: a systematic  
43  
44 561 analysis for the Global Burden of Disease Study 2019. *The Lancet*. 2020;396(10258):1223-49.  
45  
46  
47 562 22. Collaborators GL. Estimates of the global, regional, and national morbidity, mortality, and  
48  
49 563 aetiologies of lower respiratory tract infections in 195 countries: a systematic analysis for the  
50  
51 564 Global Burden of Disease Study 2015. *Lancet Infect Dis*. 2017;17(11):1133-61. PubMed PMID:  
52  
53 28843578. Epub 08/23. eng.  
54  
55  
56  
57  
58  
59  
60

- 1  
2  
3 566 23. DALYs GBD, Collaborators H. Global, regional, and national disability-adjusted life-years  
4  
5 567 (DALYs) for 315 diseases and injuries and healthy life expectancy (HALE), 1990-2015: a  
6  
7 568 systematic analysis for the Global Burden of Disease Study 2015. *Lancet* (London, England).  
8  
9 569 2016;388(10053):1603-58. PubMed PMID: 27733283. eng.
- 10  
11  
12 570 24. Dicker D, Nguyen G, Abate D, Abate KH, Abay SM, Abbafati C, et al. Global, regional,  
13  
14 571 and national age-sex-specific mortality and life expectancy, 1950-2017: a systematic  
15  
16 572 analysis for the Global Burden of Disease Study 2017. *The Lancet*. 2018;392(10159):1684-735.
- 17  
18  
19 573 25. Lim SS, Vos T, Flaxman AD, Danaei G, Shibuya K, Adair-Rohani H, et al. A comparative  
20  
21 574 risk assessment of burden of disease and injury attributable to 67 risk factors and risk factor clusters  
22  
23 575 in 21 regions, 1990-2010: a systematic analysis for the Global Burden of Disease Study 2010.  
24  
25 576 *Lancet* (London, England). 2012;380(9859):2224-60. PubMed PMID: 23245609. eng.
- 26  
27  
28 577 26. Collaborators GBDRF, Forouzanfar MH, Alexander L, Anderson HR, Bachman VF,  
29  
30 578 Biryukov S, et al. Global, regional, and national comparative risk assessment of 79 behavioural,  
31  
32 579 environmental and occupational, and metabolic risks or clusters of risks in 188 countries, 1990-  
33  
34 580 2013: a systematic analysis for the Global Burden of Disease Study 2013. *Lancet* (London,  
35  
36 581 England). 2015;386(10010):2287-323. PubMed PMID: 26364544. Epub 09/11. eng.
- 37  
38  
39 582 27. Shibre G, Zegeye B, Idriss-Wheeler D, Yaya S. Trends of inequalities in care seeking  
40  
41 583 behavior for under-five children with suspected pneumonia in Ethiopia: evidence from Ethiopia  
42  
43 584 demographic and health surveys (2005–2016). *BMC Public Health*. 2021 2021/02/01;21(1):258.
- 44  
45  
46 585 28. UNICEF. *Fighting for Breath in Ethiopia: a call to action to stop children dying from*  
47  
48 586 *pneumonia*. 2020.
- 49  
50  
51 587 29. Kovacs SD, Mullholland K, Bosch J, Campbell H, Forouzanfar MH, Khalil I, et al.  
52  
53 588 *Deconstructing the differences: a comparison of GBD 2010 and CHERG's approach to estimating*



- 1  
2  
3 589 the mortality burden of diarrhea, pneumonia, and their etiologies. BMC Infectious Diseases. 2015  
4  
5 590 2015/01/16;15(1):16.  
6  
7  
8 591 30. Federal Ministry of Health E. EVIDENCE SYSTHESIS BASED ON DHS KEY MCH  
9  
10 592 AND NUTRITION INDICATORS. 2019.  
11  
12 593 31. Health FDRoE-Mo. Mini Demographic and Health Survey 2019. 2019.  
13  
14 594 32. Corrêa RA, José BPS, Malta DC, Passos VMA, França EB, Teixeira RA, et al. Burden of  
15  
16 595 disease by lower respiratory tract infections in Brazil, 1990 to 2015: estimates of the Global Burden  
17  
18 596 of Disease 2015 study. Revista brasileira de epidemiologia = Brazilian journal of epidemiology.  
19  
20 597 2017 May;20Suppl 01(Suppl 01):171-81. PubMed PMID: 28658381. Epub 2017/06/29. Carga de  
21  
22 598 doença por infecções do trato respiratório inferior no Brasil, 1990 a 2015: estimativas do estudo  
23  
24 599 Global Burden of Disease 2015. por  
25  
26  
27  
28  
29 600 eng.  
30  
31 601 33. Salam RA, Das JK, Bhutta ZA. Current issues and priorities in childhood nutrition, growth,  
32  
33 602 and infections. The Journal of nutrition. 2015 May;145(5):1116S-22S. PubMed PMID: 25833888.  
34  
35 603 Pubmed Central PMCID: PMC4410495. Epub 2015/04/03. eng.  
36  
37  
38 604 34. Akombi BJ, Agho KE, Hall JJ, Wali N, Renzaho AMN, Merom D. Stunting, Wasting and  
39  
40 605 Underweight in Sub-Saharan Africa: A Systematic Review. International journal of environmental  
41  
42 606 research and public health. 2017 Aug 1;14(8). PubMed PMID: 28788108. Pubmed Central  
43  
44 607 PMCID: PMC5580567. Epub 2017/08/10. eng.  
45  
46  
47 608 35. Ibrahim MK, Zambruni M, Melby CL, Melby PC. Impact of Childhood Malnutrition on  
48  
49 609 Host Defense and Infection. Clinical microbiology reviews. 2017 Oct;30(4):919-71. PubMed  
50  
51 610 PMID: 28768707. Pubmed Central PMCID: PMC5608884. Epub 2017/08/05. eng.  
52  
53  
54  
55  
56  
57  
58  
59  
60

- 1  
2  
3 611 36. Fantay Gebru K, Mekonnen Haileselassie W, Haftom Temesgen A, Oumer Seid A,  
4  
5 612 Afework Mulugeta B. Determinants of stunting among under-five children in Ethiopia: a  
6  
7 613 multilevel mixed-effects analysis of 2016 Ethiopian demographic and health survey data. BMC  
8  
9 614 Pediatrics. 2019 2019/06/01;19(1):176.
- 10  
11  
12 615 37. Dherani M, Pope D, Mascarenhas M, Smith KR, Weber M, Bruce N. Indoor air pollution  
13  
14 616 from unprocessed solid fuel use and pneumonia risk in children aged under five years: a systematic  
15  
16 617 review and meta-analysis. Bulletin of the World Health Organization. 2008 May;86(5):390-8C.  
17  
18 618 PubMed PMID: 18545742. Pubmed Central PMCID: PMC2647443. Epub 2008/06/12. eng.
- 19  
20  
21 619 38. Kurmi OP, Lam KB, Ayres JG. Indoor air pollution and the lung in low- and medium-  
22  
23 620 income countries. The European respiratory journal. 2012 Jul;40(1):239-54. PubMed PMID:  
24  
25 621 22362845. Epub 2012/03/01. eng.
- 26  
27  
28 622 39. Burnett RT, Pope CA, 3rd, Ezzati M, Olives C, Lim SS, Mehta S, et al. An integrated risk  
29  
30 623 function for estimating the global burden of disease attributable to ambient fine particulate matter  
31  
32 624 exposure. Environmental health perspectives. 2014 Apr;122(4):397-403. PubMed PMID:  
33  
34 625 24518036. Epub 2014/02/13. eng.
- 35  
36  
37 626 40. Federal Ministry of Health Addis Ababa E. Health Sector Transformation Plan 2015/16 -  
38  
39 627 2019/20 (2008-2012 EFY). . August 2015. .
- 40  
41  
42 628 41. Stenberg K, Hanssen O, Edejer TT-T, Bertram M, Brindley C, Meshreky A, et al.  
43  
44 629 Financing transformative health systems towards achievement of the health Sustainable  
45  
46 630 Development Goals: a model for projected resource needs in 67 low-income and middle-income  
47  
48 631 countries. The Lancet Global Health. 2017;5(9):e875-e87.
- 49  
50  
51  
52  
53  
54  
55  
56  
57  
58  
59  
60

1  
2  
3  
4  
5  
6  
7  
8  
9  
10  
11  
12  
13  
14  
15  
16  
17  
18  
19  
20  
21  
22  
23  
24  
25  
26  
27  
28  
29  
30  
31  
32  
33  
34  
35  
36  
37  
38  
39  
40  
41  
42  
43  
44  
45  
46  
47  
48  
49  
50  
51  
52  
53  
54  
55  
56  
57  
58  
59  
60

632 42. Byass P, de Courten M, Graham WJ, Laflamme L, McCaw-Binns A, Sankoh OA, et al.  
633 Reflections on the global burden of disease 2010 estimates. PLoS Med. 2013;10(7):e1001477-e.  
634 PubMed PMID: 23843748. Epub 07/02. eng.

635  
636

For peer review only

1  
2  
3 637 *Figure 1: Incidence of lower respiratory infections per 100,000 people in Ethiopia and its regions*  
4  
5 638 *in 2019.*

7  
8 639 *Figure 2: Trend in age-standardized incidence rate of LRIs per 100,000 people in Ethiopia,*  
9 640 *1990-2019*

10  
11 641 *Figure 3: Trend in LRIs age-standardized mortality rates per 100,000 people in Ethiopia, 1990-*  
12  
13 642 *2019*

14  
15  
16 643 *Figure 4: Trend in LRIs age standardized years of life lost rates per 100,000 people in Ethiopia,*  
17 644 *1990-2019*

18  
19  
20 645  
21  
22  
23  
24  
25  
26  
27  
28  
29  
30  
31  
32  
33  
34  
35  
36  
37  
38  
39  
40  
41  
42  
43  
44  
45  
46  
47  
48  
49  
50  
51  
52  
53  
54  
55  
56  
57  
58  
59  
60

Figure 1: Incidence of lower respiratory infections per 100,000 people in Ethiopia and its regions in 2019.

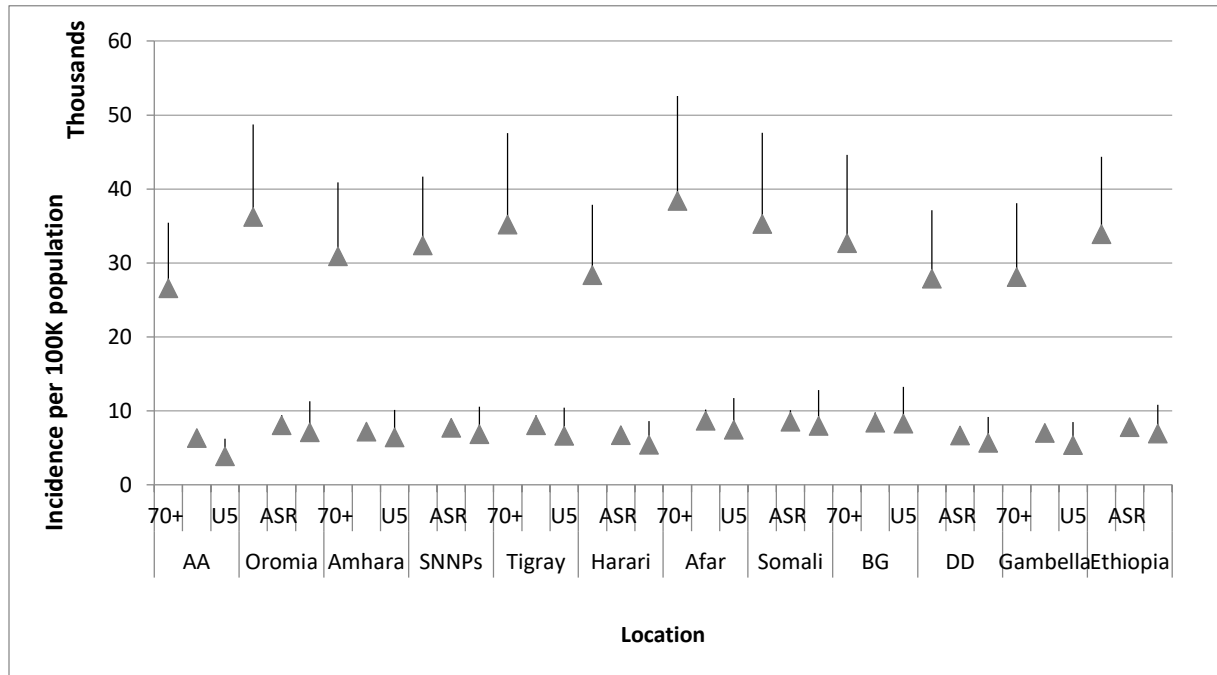

Key: U5: children younger than 5 years; 70+: adults older than 70 years; ASR: Age-standardized rates; AA: Addis Ababa; DD: Dire Dawa; SNNPs: Southern Nations and Nationalities and Peoples; BG: Benishangul Gumuz

Figure 2: Trend in age-standardized incidence rate of LRIs per 100,000 people in Ethiopia, 1990-

2019

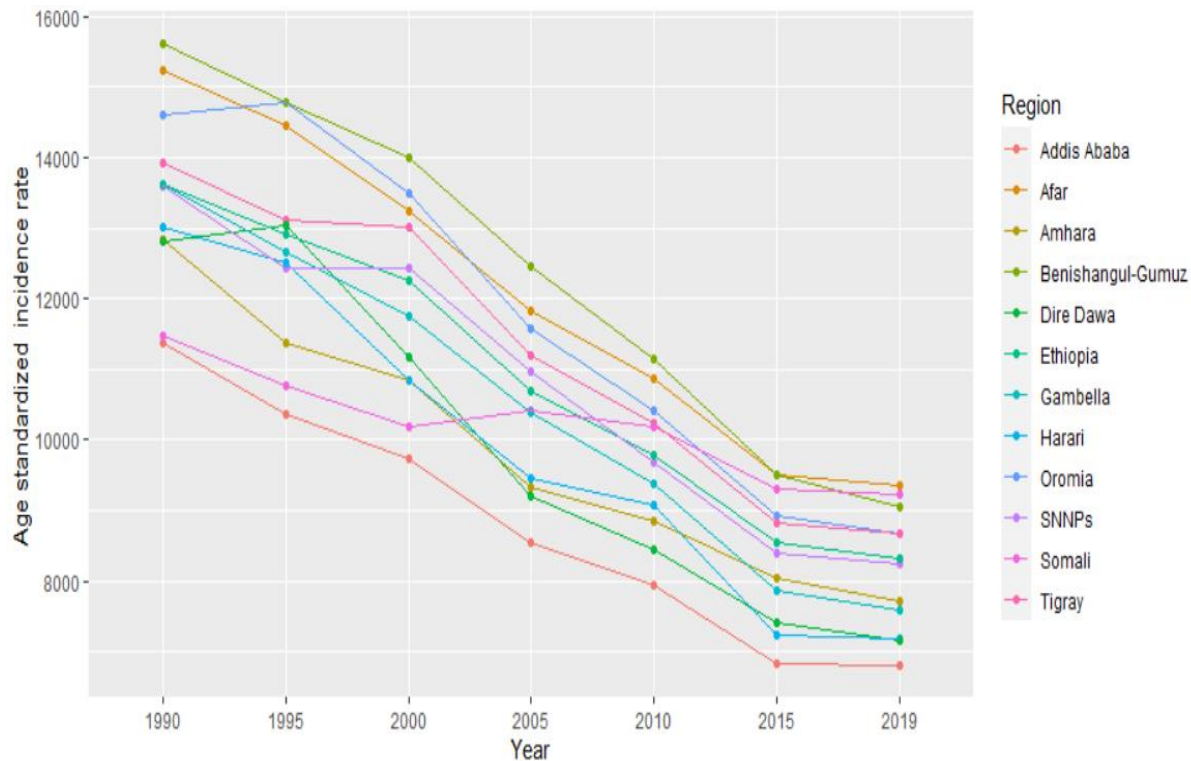

Figure 3: Trend in LRIs age-standardized mortality rates per 100,000 people in Ethiopia, 1990-2019

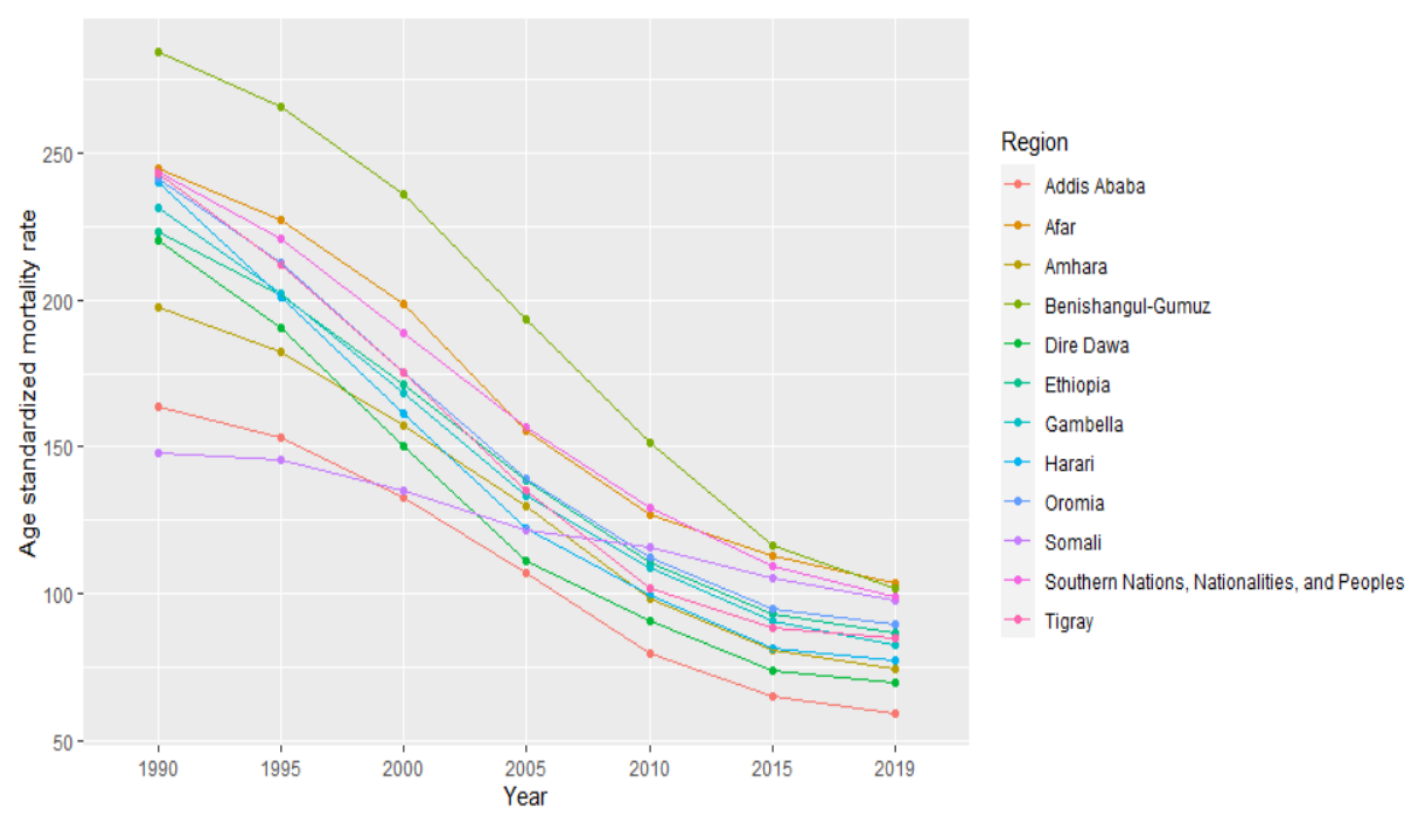

Figure 4: Trend in LRIs age standardized years of life lost rates per 100,000 people in Ethiopia, 1990-2019

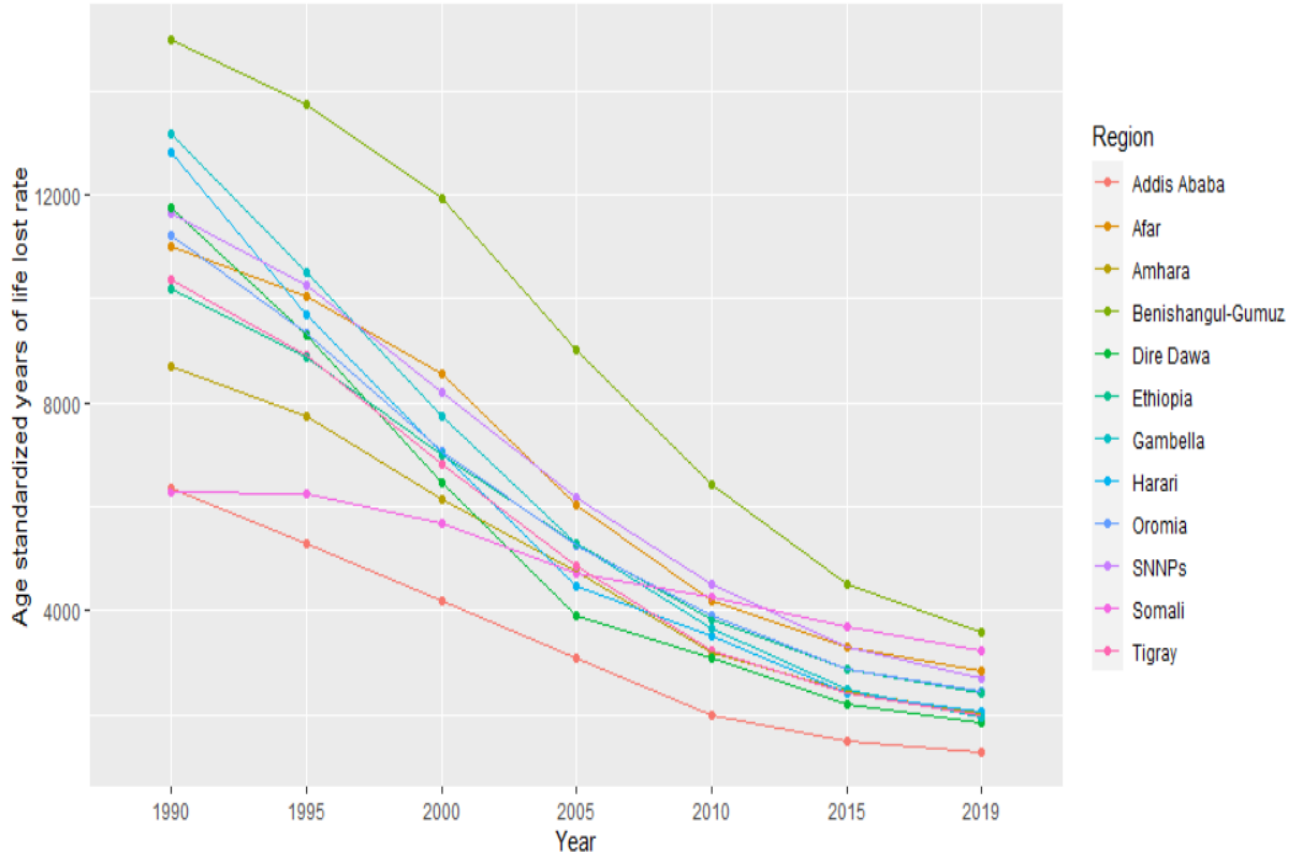

view only



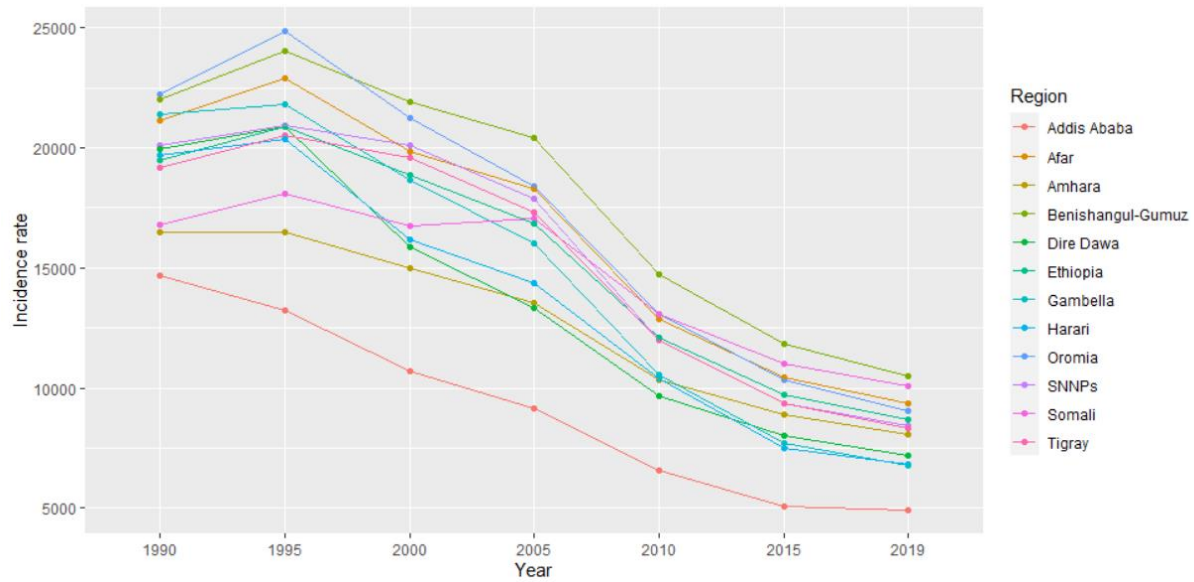

Appendix figure 1: Children under 5 years of age incidence rate per 100,000 populations due to LRI in Ethiopia, 1990- 2019

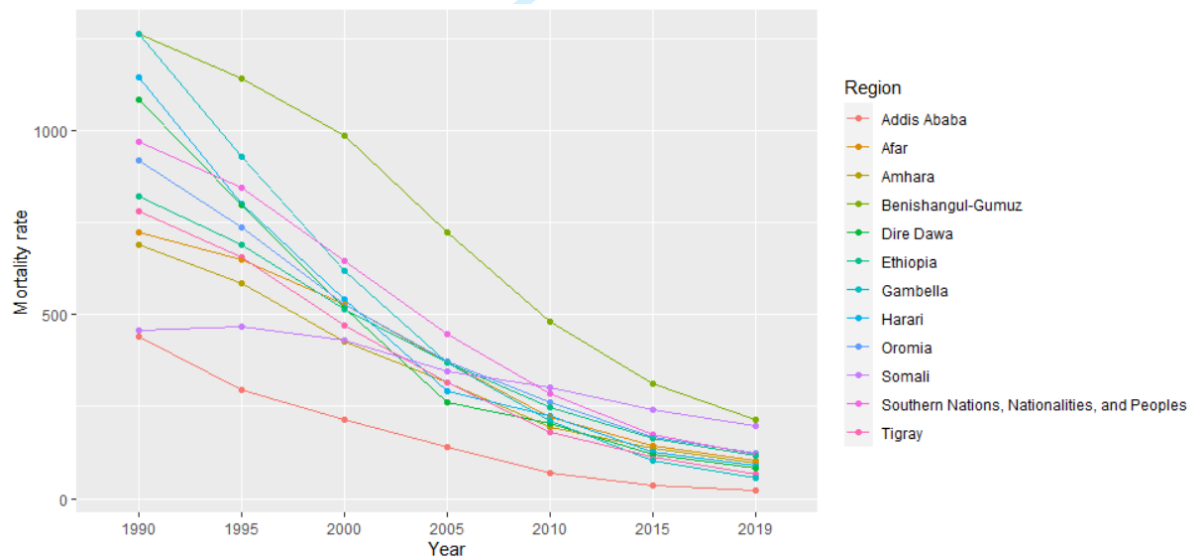

Appendix figure 2: Children younger than 5 years mortality rate per 100,000 populations for lower respiratory infections in Ethiopia, 1990-2019

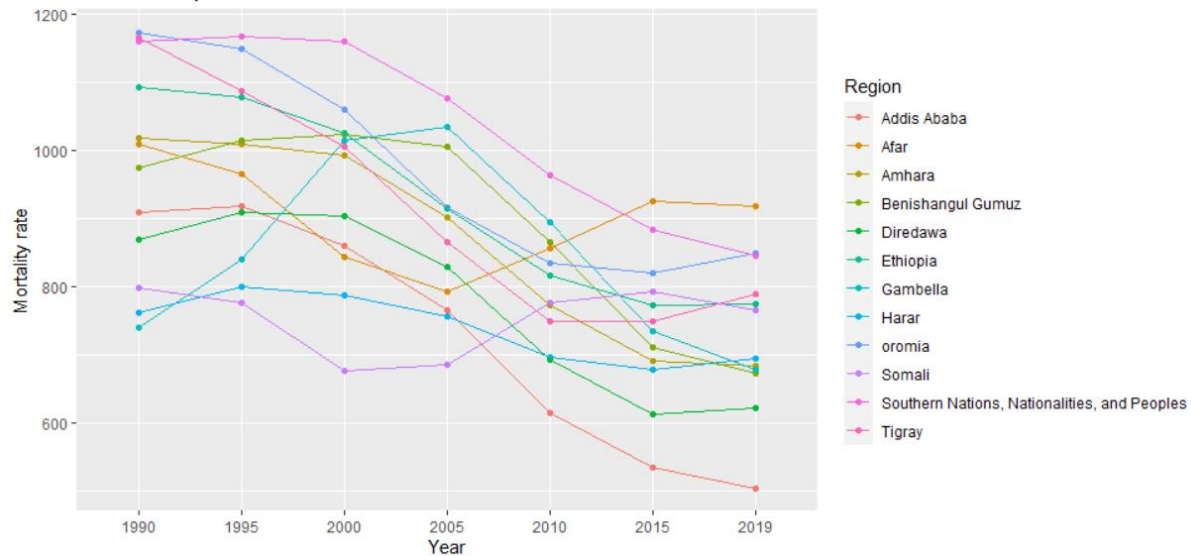

Appendix figure 3: Adults older than 70 years mortality rate per 100,000 populations for lower respiratory infections in Ethiopia, 1990-2019

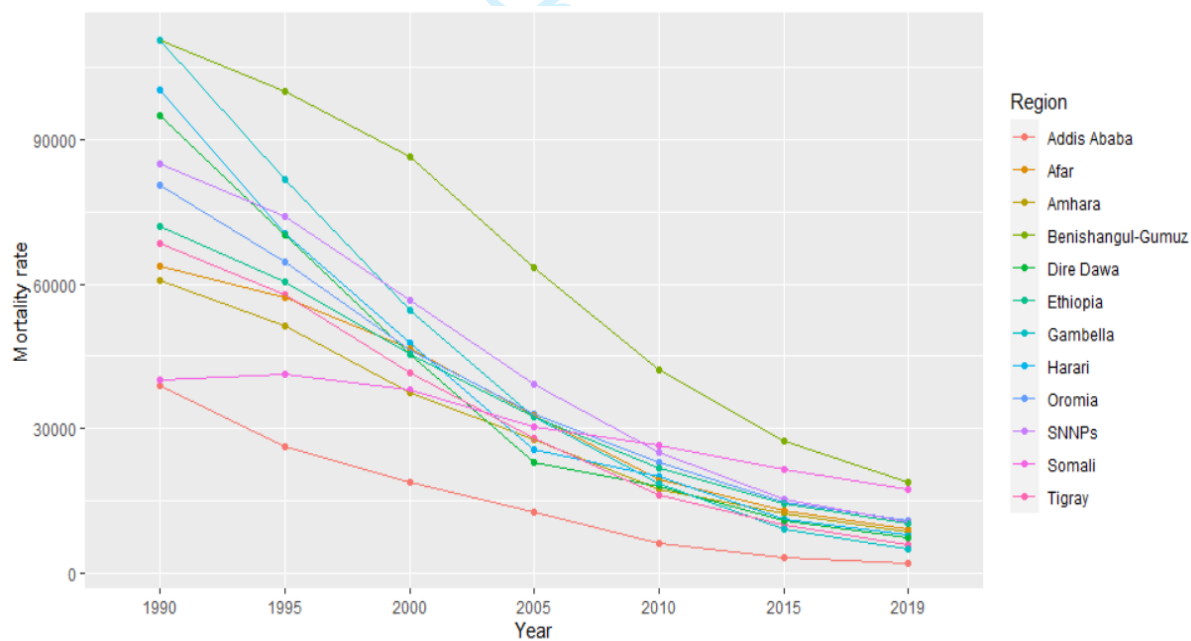

Appendix figure 4: Children younger than 5 years YLL per 100,000 populations for lower respiratory infections in Ethiopia, 1990-2019

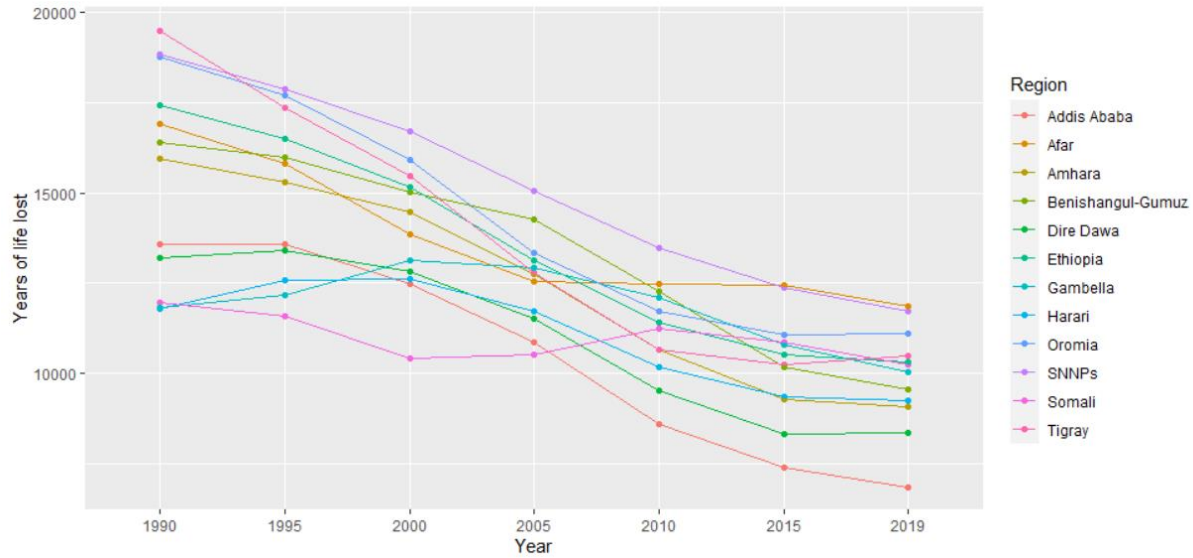

16  
17 Appendix figure 5: Adults older than 70 years YLL per 100,000 populations for lower respiratory  
18 infections in Ethiopia, 1990-2019

| Location          | Alcohol use | Ambient particulate matter pollution | Child stunting | Child underweight | child wasting | High temperature | Household air pollution from solid fuel | Low birth weight | Low temperature | No access to handwashing facility | Non-exclusive breastfeeding | Secondhand smoke | Short gestation | Smoking |
|-------------------|-------------|--------------------------------------|----------------|-------------------|---------------|------------------|-----------------------------------------|------------------|-----------------|-----------------------------------|-----------------------------|------------------|-----------------|---------|
| Addis Ababa       | 1.4         | 4                                    | 0.1            | 0.1               | 0.7           | 0                | 1.7                                     | 0.7              | 3.7             | 4.8                               | 0.1                         | 0.4              | 0.7             | 1       |
| Oromia            | 0.6         | 2.5                                  | 2.5            | 1.9               | 11.2          | 0.9              | 21.6                                    | 4.3              | 2.2             | 10.3                              | 0.9                         | 0.6              | 3.5             | 1.3     |
| Amhara            | 0.4         | 2.5                                  | 1.8            | 1.4               | 6.7           | 0.9              | 19.8                                    | 3.3              | 2.4             | 9.5                               | 0.4                         | 0.6              | 2.6             | 0.4     |
| SNNPs             | 0.8         | 2.4                                  | 2.7            | 2.2               | 10.2          | 1.8              | 19.9                                    | 3.5              | 1.4             | 9.6                               | 0.8                         | 0.5              | 2.9             | 0.9     |
| Tigray            | 0.7         | 3.3                                  | 0.8            | 0.8               | 4             | 1.1              | 17.7                                    | 2.8              | 1.2             | 9.4                               | 0.3                         | 0.5              | 2.4             | 0.4     |
| Harari            | 1           | 3.8                                  | 0.9            | 0.7               | 5.3           | 0                | 9.6                                     | 2.4              | 1.1             | 7.6                               | 0.6                         | 0.6              | 2.1             | 3.2     |
| Afar              | 0.4         | 2.1                                  | 1.8            | 1.9               | 8.5           | 6.3              | 21                                      | 4.5              | 0.1             | 9.4                               | 0.9                         | 0.6              | 3.6             | 1.4     |
| Somali            | 0.3         | 1.6                                  | 3.3            | 3.8               | 22.2          | 4.8              | 31.6                                    | 7.2              | 0.4             | 13.3                              | 2.5                         | 0.9              | 5.7             | 1.8     |
| Benishangul-Gumuz | 0.4         | 3.4                                  | 4.5            | 3.5               | 20            | 4.7              | 27.7                                    | 4.9              | 0.6             | 13.3                              | 1.3                         | 0.7              | 4               | 0.8     |
| Dire Dawa         | 0.9         | 3.6                                  | 0.7            | 0.7               | 5.1           | 0.4              | 8.3                                     | 2.4              | 0.5             | 6.9                               | 0.4                         | 0.5              | 2               | 2.1     |
| Gambella          | 0.8         | 2.2                                  | 0.4            | 0.4               | 3.2           | 2.5              | 9.3                                     | 2.2              | 0.1             | 5.4                               | 0.4                         | 0.3              | 1.9             | 2.1     |
| Ethiopia          | 0.6         | 2.5                                  | 2.2            | 1.8               | 9.9           | 1.4              | 20.5                                    | 3.9              | 1.9             | 9.9                               | 0.8                         | 0.6              | 3.2             | 1       |

19  
20 Appendix figure 6: Attribution of the risk factors to LRIs death rate per 100,000 population in all  
21 age groups between 1990 and 2019 for Ethiopia and its regions, both sexes, number of death, 2019.  
22 SNNPs: Southern Nations, Nationalities, and Peoples.

|                   | Ambient particulate matter pollution | child stunting | Child under weight | child wasting | high temperature | Household air pollution from solid fuels/ birth weight | Low temperature | No access to handwashing facility | Non-exclusive breastfeeding | Secondhand smoke | Short gestation |       |
|-------------------|--------------------------------------|----------------|--------------------|---------------|------------------|--------------------------------------------------------|-----------------|-----------------------------------|-----------------------------|------------------|-----------------|-------|
| Addis Ababa       | 3.63                                 | 0.82           | 0.64               | 8.35          | 0.00             | 1.75                                                   | 8.86            | 3.29                              | 4.27                        | 1.32             | 0.31            | 7.98  |
| Oromia            | 6.41                                 | 14.75          | 11.45              | 67.14         | 2.34             | 60.08                                                  | 25.95           | 6.05                              | 28.32                       | 5.25             | 1.66            | 21.03 |
| Amhara            | 5.40                                 | 13.01          | 9.84               | 48.10         | 2.02             | 46.86                                                  | 23.47           | 5.46                              | 21.99                       | 2.81             | 1.36            | 18.88 |
| SNNPs             | 6.36                                 | 16.67          | 13.77              | 63.88         | 5.03             | 57.68                                                  | 21.95           | 4.12                              | 27.49                       | 5.28             | 1.38            | 18.31 |
| Tigray            | 5.03                                 | 6.15           | 5.75               | 29.88         | 1.87             | 29.89                                                  | 20.59           | 2.00                              | 15.32                       | 1.91             | 0.79            | 17.45 |
| Harari            | 9.12                                 | 7.21           | 5.80               | 43.66         | 0.01             | 25.51                                                  | 19.63           | 2.74                              | 19.30                       | 5.00             | 1.62            | 17.18 |
| Afar              | 4.88                                 | 11.42          | 11.57              | 52.76         | 15.77            | 53.12                                                  | 28.03           | 0.26                              | 23.50                       | 5.49             | 1.33            | 22.31 |
| Somali            | 5.40                                 | 18.08          | 20.92              | 121.83        | 16.76            | 110.21                                                 | 39.76           | 1.46                              | 46.07                       | 13.99            | 3.18            | 31.30 |
| Benishangul-Gumuz | 12.63                                | 28.22          | 22.25              | 125.72        | 17.81            | 105.51                                                 | 30.75           | 2.22                              | 50.23                       | 8.05             | 2.61            | 24.89 |
| Dire Dawa         | 9.38                                 | 5.50           | 5.64               | 42.47         | 1.11             | 23.88                                                  | 19.72           | 1.42                              | 18.88                       | 3.67             | 1.50            | 16.71 |
| Gambella          | 4.75                                 | 3.13           | 3.08               | 25.92         | 6.16             | 23.51                                                  | 18.20           | 0.18                              | 13.02                       | 2.86             | 0.60            | 15.31 |
| Ethiopia          | 6.06                                 | 14.39          | 11.93              | 64.00         | 4.28             | 58.22                                                  | 25.08           | 4.73                              | 27.20                       | 5.22             | 1.58            | 20.40 |

24

25 Appendix figure 7: Attribution of the risk factors to LRIs death rate per 100,000 population in  
 26 children younger than 5 years between 1990 and 2019 for Ethiopia and its regions, both sexes,  
 27 number of death, 2019. SNNPs: Southern Nations, Nationalities, and Peoples.

28

1  
2  
3  
4  
5  
6  
7  
8  
9  
10  
11  
12  
13  
14  
15  
16  
17  
18  
19  
20  
21  
22  
23  
24  
25  
26  
27  
28  
29  
30  
31  
32  
33  
34  
35  
36  
37  
38  
39  
40  
41  
42  
43  
44  
45  
46

Appendix table 1: Number and percentage changes of episode attributable to LRIs in 1990 and 2019 for Ethiopia, its regions, both sexes

| Location    | All ages                       |                                |           | Children younger than 5 years  |                                |           | People above 70             |                             |           |
|-------------|--------------------------------|--------------------------------|-----------|--------------------------------|--------------------------------|-----------|-----------------------------|-----------------------------|-----------|
|             | Episode, (95% UI), 1990        | Episode, (95% UI), 2019        | Change, % | Episode, (95% UI), 1990        | Episode, (95% UI), 2019        | Change, % | Episode, (95% UI), 1990     | Episode, (95% UI), 2019     | Change, % |
| Addis Ababa | 194122.9(175403.8-213856.2)    | 176027.6(162152.3-190557.8)    | 10        | 44940.6(35673.3-56859.6)       | 14522.3(11237-18367.5)         | 68        | 8099.5(6891.6-9463.2)       | 24034.2(20749.5-27702.3)    | 196**     |
| Oromia      | 2164243.7(1957719.5-2397957.9) | 2597863.9(2372089.2-2859925.6) | 20        | 739239.6(578477-935022.8)      | 613676.6(480687.2-765626.5)    | 17        | 110627.2(95303.7-129579.9)  | 292179.4(254670.4-342438.5) | 164**     |
| Amhara      | 1508431.4(1368059.8-1671550.1) | 1400682.4(1285323-1530939.8)   | 8         | 423999.3(334700.8-538426.8)    | 261397.4(206754.7-327889.7)    | 39        | 116332.8(98774.4-137194.5)  | 198977.5(173809.4-229925.5) | 71**      |
| SNNPs       | 1235554.9(1108317.9-1368520.3) | 1330491.5(1217176.7-1452694.1) | 7         | 421825.6(335087.1-526155.2)    | 307771.3(248326.4-385053.7)    | 28        | 68084.5(57450-79640.8)      | 99723(88168.3-113438)       | 46**      |
| Tigray      | 360795.1(328276.3-400714.9)    | 409829.8(376290.4-445030.2)    | 13        | 109047.9(86435.2-137691.1)     | 69958.2(55210.7-87468.6)       | 36        | 20653.3(17469.9-24256.6)    | 62677.2(53933.1-72927.6)    | 203**     |
| Harari      | 15145.9(13618.9-16851.9)       | 13765.3(12657-15054.7)         | 10        | 4693.6(3691.4-5990.1)          | 2188.4(1723.8-2761.3)          | 54        | 307.2(259.6-357)            | 1614.8(1396-1863.6)         | 425**     |
| Afar        | 113506.8(102317-126084.3)      | 113210.3(102987.9-124578)      | 1         | 32991.6(25672.4-42147.6)       | 26177.2(20744.1-32743.3)       | 21        | 2640.2(2212.5-3150.9)       | 7222.5(6246.8-8559.1)       | 173**     |
| Somali      | 300306.3(268988-336331.8)      | 463220.4(420429.8-516009.4)    | 54        | 103526.3(81391.3-131352.8)     | 126089.6(99611.9-160423.3)     | 21**      | 6182.3(5316-7370.4)         | 30203.2(25942.8-35038.5)    | 388**     |
| BG          | 68501.6(61804.9-75736.4)       | 71675.7(64972.1-79105.8)       | 4         | 20970.5(16626.7-26454.5)       | 18175.6(14339.5-22922.1)       | 14        | 3288.9(2784.8-3911.4)       | 4311.3(3743.8-5113.9)       | 31**      |
| Dire Dawa   | 30607.1(27359.8-34252.2)       | 26221.1(24010.1-28647.8)       | 15        | 9547.4(7523-12185)             | 4387.7(3439.6-5583.9)          | 55        | 1274.8(1090.1-1483.5)       | 2840.1(2469-3289.5)         | 122**     |
| Gambella    | 19687.9(17723.9-21945.7)       | 25685.2(23516.6-28093.2)       | 30**      | 6747.7(5338.7-8613.7)          | 4335.4(3428.4-5400.9)          | 36        | 1568.1(1316.6-1825.8)       | 1489.6(1281.4-1737.3)       | 6         |
| Ethiopia*   | 6010904.2(5467801.6-6648644.3) | 6628673.6(6108786.2-7230986.3) | 10**      | 1917530.8(1518850.1-2400978.5) | 1448680.4(1150089.8-1799704.4) | 25        | 339059.4(293491.9-387514.2) | 725273.3(640315.4-837746.3) | 113**     |

SNNP: Southern Nations, Nationalities, and Peoples; BG: Benishangul Gumuz; \*country's estimate; \*\*percentage increase between 1990 and 2019

Appendix table 2: Rate and percentage changes of episodes attributable to LRIs in 1990 and 2019 for Ethiopia and its regions, both sexes

| Location    | Age standardized                         |                                          |          | Children younger than 5 years            |                                          |          | People above70                           |                                          |          |
|-------------|------------------------------------------|------------------------------------------|----------|------------------------------------------|------------------------------------------|----------|------------------------------------------|------------------------------------------|----------|
|             | Episode per 100,000 people (95% UI),1990 | Episode per 100,000 people (95% UI),2019 | Change,% | Episode per 100,000 people (95% UI),1990 | Episode per 100,000 people (95% UI),2019 | Change,% | Episode per 100,000 people (95% UI),1990 | Episode per 100,000 people (95% UI),2019 | Change,% |
| Addis Ababa | 11373(10484.2-12197.4)                   | 6788.1(6285.1-7339.1)                    | 40       | 14666.9(11642.4-18556.9)                 | 4927.2(3812.5-6231.8)                    | 67       | 35138(29897.7-41054.2)                   | 30748.4(26546-35441.2)                   | 13       |
| Oromia      | 14613.1(13525.9-15725.8)                 | 8659.9(8040.1-9411.6)                    | 41       | 22232(17397.2-28120)                     | 9039.4(7080.5-11277.7)                   | 60       | 46498.3(40057.6-54464.4)                 | 41564.6(36228.7-48714.4)                 | 11       |
| Amhara      | 12826.4(11830-13882.8)                   | 7716.9(7162.3-8321.3)                    | 40       | 16487.1(13014.7-20936.6)                 | 8061.7(6376.4-10112.3)                   | 52       | 43580(37002.4-51395.2)                   | 35377.7(30902.9-40880.2)                 | 19       |
| SNNPs       | 13591.9(12538.6-14646.8)                 | 8235.5(7670.5-8846.4)                    | 39       | 20106.4(15972-25079.3)                   | 8427.1(6799.4-10543.2)                   | 59       | 44628.1(37657.5-52203.1)                 | 36616.1(32373.5-41652)                   | 18       |
| Tigray      | 13927.2(12858.2-15100.7)                 | 8663.8(8034-9382.3)                      | 38       | 19185.4(15207-24224.8)                   | 8342.1(6583.5-10430.1)                   | 57       | 43748.4(37005.1-51381)                   | 40859(35158.8-47541.2)                   | 7        |
| Harari      | 13014.6(11941-14066.7)                   | 7190.5(6684.1-7718.6)                    | 45       | 19672.6(15471.9-25106.9)                 | 6821.6(5373.5-8607.3)                    | 66       | 33916.7(28665.1-39416.7)                 | 32797.4(28354-37850.7)                   | 4        |
| Afar        | 15245.7(14050.8-16525.6)                 | 9350.1(8648.8-10157.4)                   | 39       | 21151.6(16459.1-27021.7)                 | 9365.5(7421.7-11714.7)                   | 56       | 39849(33393.8-47557.2)                   | 44368.7(38375.2-52580.1)                 | 11**     |
| Somali      | 11482.7(10638.1-12368.7)                 | 9220(8515.8-10046.3)                     | 20       | 16792.9(13202.4-21306.6)                 | 10062.7(7949.6-12802.8)                  | 41       | 32748.3(28159.7-39042.1)                 | 41031.2(35243.4-47600)                   | 25**     |
| BG          | 15628.1(14481-16809.3)                   | 9054.6(8394.2-9766)                      | 42       | 22041.1(17475.5-27805)                   | 10481.8(8269.5-13219)                    | 53       | 42911.6(36334.5-51032.5)                 | 37592.7(32643.9-44591.2)                 | 13       |
| Dire Dawa   | 12806.6(11807.9-13871.4)                 | 7148.8(6634.6-7750.7)                    | 44       | 19968.2(15734.3-25484.7)                 | 7191.5(5637.6-9152.1)                    | 64       | 38333(32779.4-44607)                     | 32033.6(27847.4-37101.4)                 | 17       |
| Gambella    | 13623.1(12637.4-14572.4)                 | 7575.8(7002.3-8128.2)                    | 44       | 21419.8(16947.2-27343.2)                 | 6791.1(5370.4-8460.1)                    | 69       | 40197.8(33751.8-46803.7)                 | 32657.1(28093.9-38087.2)                 | 19       |
| Ethiopia*   | 13619.7(12640.8-14588.6)                 | 8313.7(7757.6-8918)                      | 39       | 19486.4(15434.9-24399.3)                 | 8685.3(6895.1-10789.8)                   | 56       | 44092.2(38166.5-50393.4)                 | 38394.4(33896.9-44348.5)                 | 13       |

SNNP: Southern Nations, Nationalities, and Peoples; BG: Benishangul Gumuz; \*country's estimate; \*\*percentage increase between 2019 and 1990

1  
2  
3  
4  
5  
6  
7  
8  
9  
10  
11  
12  
13  
14  
15  
16  
17  
18  
19  
20  
21  
22  
23  
24  
25  
26  
27  
28  
29  
30  
31  
32  
33  
34  
35  
36  
37  
38  
39  
40  
41  
42  
43  
44  
45  
46

Appendix table 3: Number and percentage changes of death attributable to LRIs in 1990 and 2019 for Ethiopia and its regions, both sexes.

| Location    | All age                  |                          |          | Children younger than 5   |                        |           | People above 70 years  |                          |          |
|-------------|--------------------------|--------------------------|----------|---------------------------|------------------------|-----------|------------------------|--------------------------|----------|
|             | death, (95% UI),1990     | death, (95% UI),2019     | Change,% | death, (95% UI), 1990     | Death, (95% UI),2019   | Change, % | Death , (95% UI),1990  | Death, (95% UI),2019     | Change,% |
| Addis Ababa | 2159.3(1731.9-2690.7)    | 918.8(767.4-1116.9)      | 58       | 1353(981.9-1846.7)        | 69.1(41.7-107.4)       | 95        | 209.5(154.3-291.5)     | 393.6(320.9-495.3)       | 87**     |
| Oromia      | 40004.4(29432.4-51942.2) | 18206.1(15193.3-21745.4) | 55       | 30614.3(20932.5-42033.5)  | 8306.2(5763.5-11611.8) | 73        | 2793.5(2005.1-3673)    | 5971.6(4831.7-7093.4)    | 113**    |
| Amhara      | 25449.3(20869.5-30724.8) | 9525.5(7530.5-11872.2)   | 63       | 17780.1(13674.3-22720.1)  | 3079.5(1805.3-4737.3)  | 83        | 2717.2(2016.4-3535.8)  | 3839.9(3022.6-4825.6)    | 41**     |
| SNNPs       | 26044.7(20108-33017)     | 9494.7(7713.5-11649)     | -64      | 20390.6(14627.6-26712.9)  | 4326.6(2891.3-6157.2)  | 79        | 1771.7(1254.5-2417.6)  | 2302.6(1867.3-2772.8)    | 29**     |
| Tigray      | 6463.8(5272.1-7762.9)    | 2551.4(2090.3-3028.6)    | 61       | 4436(3373.5-5736)         | 564.2(364.9-825)       | 88        | 550.8(395.7-749.1)     | 1209.7(978.5-1467.8)     | 119**    |
| Harari      | 336(233.3-448.8)         | 93.1(73.8-116)           | 73       | 273.5(174.1-382.7)        | 28.8(16.4-44.3)        | 90        | 6.9(3.7-11)            | 34.1(27.1-41.8)          | 395**    |
| Afar        | 1717.5(1300.7-2243.4)    | 706.2(567.7-869.6)       | -59      | 1128.9(751.1-1596.7)      | 284.2(182.5-426)       | 75        | 66.9(43.5-102.1)       | 149.3(117.3-186.6)       | 123**    |
| Somali      | 3603.8(2620-4713.6)      | 3907.5(3007.4-4959.4)    | #N/A     | 2811.1(1929.6-3874.8)     | 2472.2(1695.2-3506.8)  | 13        | 150.8(98-222.3)        | 563.1(433.4-715.8)       | 273**    |
| BG          | 1549.2(1131.1-2097)      | 619(470.7-803)           | 61       | 1204.8(805.6-1703.9)      | 373(245.3-539.3)       | 70        | 74.7(50.3-105.7)       | 77(61.1-97.3)            | 3**      |
| Dire Dawa   | 632.3(445.5-830.9)       | 154.6(120.6-193.8)       | 76       | 518.4(329.5-718.7)        | 51(27.3-82.9)          | 91        | 28.8(20.1-40)          | 55(44-67.9)              | 90**     |
| Gambella    | 475.9(328.5-635.7)       | 123.2(98.2-151.9)        | 75       | 398.6(253.7-555.7)        | 36.4(20.7-57.2)        | 91        | 28.8(18.6-41.9)        | 30.9(24.6-38.1)          | 7**      |
| Ethiopia*   | 108436.6(87669-132758.3) | 46300.7(39515.8-54642.2) | 58       | 80909.9(62491.6-103448.8) | 19591.8(14018.4-26899) | 76        | 8400.1(6490.3-10700.9) | 14627.6(12393.7-16892.8) | 74**     |

SNNP: Southern Nations, Nationalities, and Peoples; BG: Benishangul Gumuz; \*country's estimate; \*\*percentage increase between 2019 and 1990

Appendix table 4: Age standardized mortality rate, Ethiopia and its regions, by sex, 2019.

| Age standardized mortality rate per 100,000 people, 2019 |                   |                   |
|----------------------------------------------------------|-------------------|-------------------|
| Location                                                 | Female            | Male              |
| Addis Ababa                                              | 47(35.5-62.5)     | 73.6(55-98.3)     |
| Oromia                                                   | 77.3(62-92.4)     | 100.3(79.9-123.5) |
| Amhara                                                   | 57.9(44.1-73.7)   | 92.5(70.5-122.1)  |
| SNNPs                                                    | 79.2(63.5-95.2)   | 118.8(94.3-146.3) |
| Tigray                                                   | 73.2(55.9-93.5)   | 96.9(74.8-122.3)  |
| Harari                                                   | 63(49-79.9)       | 95.7(72.5-123.4)  |
| Afar                                                     | 112.4(87.3-142.3) | 98.7(76.9-127.3)  |
| Somali                                                   | 88.3(69-111.4)    | 101.7(77.2-130.7) |
| Benishangul-Gumuz                                        | 109.2(82.6-138.8) | 95.8(74.6-124.1)  |
| Dire Dawa                                                | 56.2(42.5-71.3)   | 85.4(67.3-109.5)  |
| Gambella                                                 | 47.9(34.6-60.1)   | 120.2(95.6-149.5) |
| Ethiopia                                                 | 71.8(60.2-82.9)   | 100.6(84-121.4)   |

SNNP: Southern Nations, Nationalities, and Peoples

Appendix table 5: Number and percentage changes of YLL attributable to LRIs in 1990 and 2019 for Ethiopia and its regions, both sexes

|             | all age                        |                             |          | Children younger than 5 years  |                              |          | People above 70          |                          |          |
|-------------|--------------------------------|-----------------------------|----------|--------------------------------|------------------------------|----------|--------------------------|--------------------------|----------|
|             | YLL, (95% UI),1990             | YLL, (95% UI),2019          | Change,% | YLL, (95% UI),1990             | YLL, (95% UI),2019           | Change,% | YLL, (95% UI),1990       | YLL, (95% UI),2019       | Change,% |
| Addis Ababa | 149543.9(115542.6-195437)      | 29703.1(23833.4-36855.7)    | 81       | 118961.7(86499.1-162678.7)     | 6098.2(3693.1-9483.3)        | 95       | 3131.8(2301.7-4374.6)    | 5359.8(4334.8-6816.8)    | 71**     |
| Oromia      | 3019031.9(2144916.2-4057496.3) | 981808.4(748459.2-1278135)  | 68       | 2680397.2(1832260.4-3680767.1) | 729313.8(506226.4-1021016.9) | 73       | 44619.5(31636-59105.6)   | 78166.1(62837.5-93527.9) | 75**     |
| Amhara      | 1813522.3(1445106.4-2246142.2) | 428277.8(309674.7-583000.2) | 77       | 1560078.3(1201305.4-1993362.8) | 270909.2(158846-416496.1)    | 83       | 42578.2(31294.7-56216.9) | 50955.1(39726.1-64844.6) | 19**     |
| SNNPs       | 1993643.3(1489598.4-2577052.3) | 543135.8(405565.6-711397.4) | 73       | 1785675.1(1284021-2339272.5)   | 380166.4(254486.8-541224.9)  | 79       | 28746.2(20086.2-39789.1) | 31964.4(25673.6-38778.5) | 11**     |



|           |                                 |                                |     |                                |                                |    |                             |                           |       |
|-----------|---------------------------------|--------------------------------|-----|--------------------------------|--------------------------------|----|-----------------------------|---------------------------|-------|
| Tigray    | 455613.4(364406.1-569702.1)     | 96429.9(74139.8-122350.5)      | 79  | 389399.3(296618.1-504230.2)    | 49712.6(32198.3-72764.9)       | 88 | 9207.1(6568.7-12629.1)      | 16086.6(12946.2-19581.8)  | 74**  |
| Harari    | 26755.3(17866.5-36380.3)        | 4273.6(2999.1-5798.4)          | 85  | 23959.3(15245.4-33513.8)       | 2541.6(1449.6-3887.3)          | 90 | 106.7(57.6-175.1)           | 455.9(361.3-558.3)        | 327** |
| Afar      | 124052(89386.4-166880.5)        | 39507.6(29535.5-52178.5)       | 69  | 99155.3(65972.9-140018.8)      | 24998.1(16028.5-37426.3)       | 75 | 1121.4(723.7-1722.7)        | 1931.7(1521.3-2395.6)     | 72**  |
| Somali    | 281532.2(201275.3-374880.8)     | 266379.4(193669.7-357880.7)    | 6   | 247138.5(169803.8-339740.3)    | 216954(148995.2-307369.5)      | 13 | 2256.6(1434.6-3376.4)       | 7542.1(5740-9680.2)       | 234** |
| BG        | 119211.2(83517.3-165095.7)      | 42245.6(30388.8-57591.8)       | -65 | 105463.5(70756-148983.1)       | 32718.1(21576.4-47307.2)       | 69 | 1256.7(836.7-1780.3)        | 1094.3(857.5-1389.1)      | 13    |
| Dire Dawa | 50024.5(33464.5-67580.6)        | 7267.7(5038-10264.7)           | 86  | 45377.4(28907.2-62914.9)       | 4497.4(2411.8-7298.3)          | 91 | 439.2(306.6-609.5)          | 742.1(586.6-922.8)        | 68**  |
| Gambella  | 37680.8(24783.6-51516.1)        | 6064.4(4389.3-7853.6)          | 84  | 34899.5(22233.1-48609.4)       | 3212.2(1830.4-5034.1)          | 91 | 460.7(299.3-663.6)          | 457.5(352.6-577.6)        | 1     |
| Ethiopia* | 8070611.3(6356905.2-10091563.7) | 2445093.7(1934420.8-3119838.6) | 70  | 7090505.4(5482895.7-9059421.2) | 1721122.3(1231032.1-2362958.7) | 76 | 133924.6(102756.8-170932.9) | 194756.2(165462-225502.1) | 45**  |

SNNP: Southern Nations, Nationalities, and Peoples; BG: Benishangul Gumuz; \*country's estimate; \*\*percentage increase between 2019 and 1990

Appendix table 6: Rate and percentage changes of YLL attributable to LRIs in 1990 and 2019 for Ethiopia and its regions, both sexes.

| Location    | all age                      |                              |          | Children younger than 5 years |                              |          | People above 70              |                              |          |
|-------------|------------------------------|------------------------------|----------|-------------------------------|------------------------------|----------|------------------------------|------------------------------|----------|
|             | YLL per 100,000 people, 1990 | YLL per 100,000 people, 2019 | Change,% | YLL per 100,000 people, 1990  | YLL per 100,000 people, 2019 | Change,% | YLL per 100,000 people, 1990 | YLL per 100,000 people, 2019 | Change,% |
| Addis Ababa | 6362.2(5161.9-7847.9)        | 1285.6(1065-1561.8)          | 80       | 38824.7(28230.1-53092.4)      | 6857.1(5545.8-8721.2)        | 95       | 13587(9985.4-18978.3)        | 6857.1(5545.8-8721.2)        | 50       |
| Oromia      | 11217.6(8517-14318)          | 2433.8(2042.2-2879.5)        | 78       | 80610.7(55103.7-110696)       | 11119.7(8939.1-13305)        | 87       | 18754.2(13297.1-24843)       | 11119.7(8939.1-13305)        | 41       |
| Amhara      | 8690.4(7146.3-10453.8)       | 2016.4(1551.4-2541.8)        | 77       | 60663.3(46712.5-77511.5)      | 9059.7(7063.2-11529.2)       | 87       | 15950.4(11723.4-21059.7)     | 9059.7(7063.2-11529.2)       | 44       |
| SNNPs       | 11633(9119.4-14477.9)        | 2698.1(2243.5-3250.2)        | 77       | 85114.7(61203.2-111502.1)     | 11736.6(9426.7-14238.6)      | 88       | 18842.6(13166.1-26081)       | 11736.6(9426.7-14238.6)      | 38       |
| Tigray      | 10346.4(8522.9-12340.3)      | 1977.1(1593.9-2395)          | 81       | 68509.3(52185.7-88712.2)      | 10486.8(8439.5-12765.3)      | 92       | 19502.8(13914.1-26751.2)     | 10486.8(8439.5-12765.3)      | 47       |
| Harari      | 12826.5(9336.5-16985.4)      | 2060.4(1595.6-2623.1)        | 84       | 100421.7(63898.7-140467.8)    | 9260.4(7338.7-11340.3)       | 93       | 11782.6(6360.4-19341.1)      | 9260.4(7338.7-11340.3)       | 22       |

1  
2

|              |                          |                       |    |                           |                         |    |                          |                         |    |
|--------------|--------------------------|-----------------------|----|---------------------------|-------------------------|----|--------------------------|-------------------------|----|
| 3 Afar       | 10993.5(8520.8-14193.6)  | 2824.6(2323-3414)     | 74 | 63570.5(42296.6-89769)    | 11867.1(9346-14716.9)   | 86 | 16925.5(10923.7-26001.7) | 11867.1(9346-14716.9)   | 30 |
| 5 Somali     | 6286.9(4860.5-7970)      | 3236.4(2537.4-4006)   | 49 | 40088.1(27543.7-55109)    | 10246(7797.8-13150.6)   | 57 | 11953.6(7599.2-17885.5)  | 10246(7797.8-13150.6)   | 15 |
| 7 BG         | 14965.1(11197.4-19998.6) | 3571.1(2772.4-4510.7) | 76 | 110847.2(74368-156588.4)  | 9541.9(7476.9-12112.3)  | 83 | 16397.3(10917-23228.5)   | 9541.9(7476.9-12112.3)  | 42 |
| 9 Dire Dawa  | 11749.7(8605.4-15249.5)  | 1832.8(1407.3-2363.1) | 84 | 94905.3(60458.5-131584.5) | 8371(6616.3-10408.2)    | 93 | 13207.9(9219.6-18328.2)  | 8371(6616.3-10408.2)    | 37 |
| 11 Gambella  | 13175.8(9291-17411)      | 1937.4(1567.6-2344.6) | 85 | 110783.8(70576-154304.1)  | 10030.9(7730.2-12664.9) | 96 | 11811.4(7673.5-17012.5)  | 10030.9(7730.2-12664.9) | 16 |
| 13 Ethiopia* | 10189.1(8347.5-12201.8)  | 2404.5(2059.4-2833.3) | 76 | 72055.4(55718.5-92064)    | 10309.9(8759.2-11937.6) | 86 | 17415.9(13362.7-22228.5) | 10309.9(8759.2-11937.6) | 41 |

15 SNNP: Southern Nations, Nationalities, and Peoples; BG: Benishangul Gumuz; \*country's estimate; \*\*percentage increase between 2019 and 1990

16  
17  
18  
19  
20  
21  
22  
23  
24  
25  
26  
27  
28  
29  
30  
31  
32  
33  
34  
35  
36  
37  
38  
39  
40  
41  
42  
43  
44  
45  
46

## **Appendix: Authors**

### **Providing data or critical feedback on data sources**

Semagn Mekonnen Abate, Mesafint Molla Adane, Addis Aklilu, Dejene Tsegaye Alem, Mulusew A Asemahagn, Hunegnaw Abebe, Melaku Ashagrie Belete, Tekleberhan Hailemariam, Tezera Moshago Berheto, Belay Boda Abule Bodicha, Daniel Baza Gargamo, Alemayehu Hailu, Awoke Misganaw, Mohsen Naghavi, Negussie Boti Sidamo, Yonatan Solomon, Shambel Wedajo, Melat Weldemariam, Amanuel Yigezu, Fentabil Getnet, and Yazachew Yismaw.

### **Developing methods or computational machinery**

Semagn Mekonnen Abate, Tezera Moshago Berheto, Alemayehu Hailu, Mohsen Naghavi, Negussie Boti Sidamo, and Amanuel Yigezu.

### **Providing critical feedback on methods or results**

Semagn Mekonnen Abate, Mesafint Molla Adane, Gizachew Tadesse Akalu, Addis Aklilu, Dejene Tsegaye Alem, Zeleke Gebru, Mulusew Andualem Asemahagn, Daniel Atlaw, Tewachew Awoke, Hunegnaw Abebe, Melaku Ashagrie Belete, Tekleberhan Hailemariam, Tezera Moshago Berheto, Alemeshet Yirga, Setognal Birara Aychiluhm, Belay Boda Abule Bodicha, Chuchu Churko, Feleke Mekonnen Demeke, Abebaw Alemayehu Desta, Lankamo Ena, Tahir Eyayu, Zinabu Fentaw, Daniel Baza Gargamo, Mesfin Damtew Gebrehiwot, Mathewos Alemu Gebremichael, Melaku Getachew, Ababi Zergaw, Alemayehu Hailu, Getahun Molla, Awoke Misganaw, Mohsen Naghavi, Biniyam Sahiledengle, Bereket Beyene, Migbar Sibhat, Negussie Boti Sidamo, Damtew Damtew Solomon, Yonatan Solomon, Birhanu Wagaye, Shambel Wedajo, Melat Weldemariam, Amanuel Yigezu, Fentabil Getnet, and Yazachew Yismaw.

### **Drafting the work or revising is critically for important intellectual content**

Semagn Mekonnen Abate, Gizachew Tadesse Akalu, Mulusew A Asemahagn, Daniel Atlaw, Niguss Cherie Bekele, Melaku Ashagrie Belete, Tezera Moshago Berheto, Setognal Birara Aychiluhm, Belay Boda Abule Bodicha, Chuchu Churko, Tahir Eyayu, Zinabu Fentaw, Daniel Baza Gargamo, Melaku Getachew, Ababi Zergaw, Firehiwot Abebe Gobena, Muluken Argaw Haile, Alemayehu Hailu, Solomon Tessema Memirie, Awoke Misganaw, Mohsen Naghavi, Biniyam Sahiledengle, Bereket Beyene, Negussie Boti Sidamo, Yonatan Solomon, Dereje Mengistu Tolosa, Birhanu Wagaye, Ally Walker, Amanuel Yigezu, and Fentabil Getnet.

### **Managing the estimation or publications process**

Semagn Mekonnen Abate, Awoke Misganaw, Mohsen Naghavi, Negussie Boti Sidamo, and Amanuel Yigezu.

# BMJ Open

## The burden of lower respiratory infections and associated risk factors across regions in Ethiopia: A subnational analysis of the Global Burden of Diseases 2019 Study

|                               |                                                                                                                                                                                                                                                                                                                                                                                                                                                                                                                                                                                                                                                                                                                                                                                                                                                                                                                                                                                                                                                                                                                                                                                                                                                                                                                                                                                                                                                                                                                                                                                                                                                                                                                                                                                                                                                                                                                                                                                                                                                                                                                                                                    |
|-------------------------------|--------------------------------------------------------------------------------------------------------------------------------------------------------------------------------------------------------------------------------------------------------------------------------------------------------------------------------------------------------------------------------------------------------------------------------------------------------------------------------------------------------------------------------------------------------------------------------------------------------------------------------------------------------------------------------------------------------------------------------------------------------------------------------------------------------------------------------------------------------------------------------------------------------------------------------------------------------------------------------------------------------------------------------------------------------------------------------------------------------------------------------------------------------------------------------------------------------------------------------------------------------------------------------------------------------------------------------------------------------------------------------------------------------------------------------------------------------------------------------------------------------------------------------------------------------------------------------------------------------------------------------------------------------------------------------------------------------------------------------------------------------------------------------------------------------------------------------------------------------------------------------------------------------------------------------------------------------------------------------------------------------------------------------------------------------------------------------------------------------------------------------------------------------------------|
| Journal:                      | <i>BMJ Open</i>                                                                                                                                                                                                                                                                                                                                                                                                                                                                                                                                                                                                                                                                                                                                                                                                                                                                                                                                                                                                                                                                                                                                                                                                                                                                                                                                                                                                                                                                                                                                                                                                                                                                                                                                                                                                                                                                                                                                                                                                                                                                                                                                                    |
| Manuscript ID                 | bmjopen-2022-068498.R1                                                                                                                                                                                                                                                                                                                                                                                                                                                                                                                                                                                                                                                                                                                                                                                                                                                                                                                                                                                                                                                                                                                                                                                                                                                                                                                                                                                                                                                                                                                                                                                                                                                                                                                                                                                                                                                                                                                                                                                                                                                                                                                                             |
| Article Type:                 | Original research                                                                                                                                                                                                                                                                                                                                                                                                                                                                                                                                                                                                                                                                                                                                                                                                                                                                                                                                                                                                                                                                                                                                                                                                                                                                                                                                                                                                                                                                                                                                                                                                                                                                                                                                                                                                                                                                                                                                                                                                                                                                                                                                                  |
| Date Submitted by the Author: | 26-Jun-2023                                                                                                                                                                                                                                                                                                                                                                                                                                                                                                                                                                                                                                                                                                                                                                                                                                                                                                                                                                                                                                                                                                                                                                                                                                                                                                                                                                                                                                                                                                                                                                                                                                                                                                                                                                                                                                                                                                                                                                                                                                                                                                                                                        |
| Complete List of Authors:     | <p>Yigezu, Amanuel; Ethiopian Public Health Institute<br/> Misganaw, Awoke; University of Washington, Department of Health Metrics Sciences; Ethiopian Public Health Association, Getnet, Fentabil; Jigjiga University; Ethiopian Public Health Institute<br/> Berheto, Tezera; Ethiopian Public Health Institute<br/> Walker, Ally ; University of Washington, Department of Health Metrics Sciences<br/> Zergaw, Ababi; Ethiopian Public Health Institute; Addis Ababa University College of Health Sciences, Department of Health Systems and Policy<br/> Gobena, Firehiwot ; Ethiopian Health Insurance Service<br/> Haile, Muluken ; Ethiopian Health Insurance Service<br/> Hailu, Alemayehu; University of Bergen, Department of Global Public Health and Primary Care Medicine<br/> Memirie, Solomon Tessema; Addis Ababa University, Addis Center for Ethics and Priority Setting; Harvard University, Harvard T.H. Chan School of Public Health<br/> Tolosa, Dereje ; Ethiopian Health Insurance Service<br/> Abate, Semagn Mekonnen; Dilla University College of Health Sciences, Department of Anesthesiology<br/> Molla Adane, Mesafint; Bahir Dar University College of Medical and Health Sciences<br/> Akalu, Gizachew ; St Paul's Hospital Millennium Medical College; Addis Ababa University College of Health Sciences<br/> Aklilu, Addis ; Arba Minch University<br/> Tsegaye, Dejen; Debre Markos University College of Health Science, Adult health nursing;<br/> Gebru, Zeleke; Arba Minch University, public health; Arba minch university<br/> Asemahagn, Mulusew; Bahir Dar University College of Medical and Health Sciences, School of Public Health;<br/> Atlaw, Daniel; Madda Walabu University, ;<br/> Awoke, Tewachew ; Bahir Dar University<br/> Abebe, Hunegnaw ; Wollo University, public health<br/> Belete, Melaku; Wollo University<br/> Hailemariam, Tekleberhan; Mekelle University<br/> Yirga, Alemeshet; Bahir Dar University, Department of pharmacy<br/> Birara, Setognal; Samara University, Public Health<br/> Bodicha, Belay ; Arba Minch University<br/> Churko, Chuchu ; Arba Minch University, Public health</p> |

|                                 |                                                                                                                                                                                                                                                                                                                                                                                                                                                                                                                                                                                                                                                                                                                                                                                                                                                                                                                                                                                                                                                                                                                                                                                                                                                                                                                                                                                                   |
|---------------------------------|---------------------------------------------------------------------------------------------------------------------------------------------------------------------------------------------------------------------------------------------------------------------------------------------------------------------------------------------------------------------------------------------------------------------------------------------------------------------------------------------------------------------------------------------------------------------------------------------------------------------------------------------------------------------------------------------------------------------------------------------------------------------------------------------------------------------------------------------------------------------------------------------------------------------------------------------------------------------------------------------------------------------------------------------------------------------------------------------------------------------------------------------------------------------------------------------------------------------------------------------------------------------------------------------------------------------------------------------------------------------------------------------------|
|                                 | <p>Demeke, Feleke ; Bahir Dar University College of Medical and Health Sciences<br/> Desta, Abebaw ; University of Gondar<br/> Ena, Lankamo; Arba Minch University,<br/> Eyayu, Tahir; Debre Tabor University, Department of Medical Laboratory Sciences<br/> Fentaw, Zinabu; Wollo University, Department of Epidemiology and Biostatistics; Wollo University, Epidemiology and Biostatistics<br/> Gargamo, Daniel ; Wolaita Sodo University<br/> Gebrehiwot, Mesfin ; Wollo University<br/> Gebremichael, Mathewos ; Arba Minch University<br/> Getachew, Melaku ; Haramaya University College of Health and Medical Sciences<br/> Molla, Getahun ; University of Gondar, University of Gondar Hospital<br/> Sahiledengle, Biniyam; Madda Walabu University, Public Health<br/> Beyene, Bereket; Arba Minch University<br/> Sibhat, Migbar; Dilla University College of Health Sciences, Nursing;<br/> Sidamo, Negussie ; Arba Minch University, Public Health<br/> Solomon, Damtew ; Madda Walabu University<br/> Solomon, Yonatan ; Dire Dawa University<br/> Wagaye, Birhanu; Wollo University; Ethiopian Public Health Institute<br/> Wedajo, Shambel; Wollo University,<br/> Weldemariam, Melat; Arba Minch University, Department of Medical Laboratory Sciences<br/> Yismaw, Yazachew ; Bahir Dar University<br/> Naghavi, Moshen; University of Washington School of Public Health,</p> |
| <b>Primary Subject Heading</b>: | Infectious diseases                                                                                                                                                                                                                                                                                                                                                                                                                                                                                                                                                                                                                                                                                                                                                                                                                                                                                                                                                                                                                                                                                                                                                                                                                                                                                                                                                                               |
| Secondary Subject Heading:      | Epidemiology, Respiratory medicine, Public health, Health policy, Global health                                                                                                                                                                                                                                                                                                                                                                                                                                                                                                                                                                                                                                                                                                                                                                                                                                                                                                                                                                                                                                                                                                                                                                                                                                                                                                                   |
| Keywords:                       | Epidemiology < INFECTIOUS DISEASES, Respiratory infections < THORACIC MEDICINE, Health policy < HEALTH SERVICES ADMINISTRATION & MANAGEMENT                                                                                                                                                                                                                                                                                                                                                                                                                                                                                                                                                                                                                                                                                                                                                                                                                                                                                                                                                                                                                                                                                                                                                                                                                                                       |
|                                 |                                                                                                                                                                                                                                                                                                                                                                                                                                                                                                                                                                                                                                                                                                                                                                                                                                                                                                                                                                                                                                                                                                                                                                                                                                                                                                                                                                                                   |

SCHOLARONE™  
Manuscripts



I, the Submitting Author has the right to grant and does grant on behalf of all authors of the Work (as defined in the below author licence), an exclusive licence and/or a non-exclusive licence for contributions from authors who are: i) UK Crown employees; ii) where BMJ has agreed a CC-BY licence shall apply, and/or iii) in accordance with the terms applicable for US Federal Government officers or employees acting as part of their official duties; on a worldwide, perpetual, irrevocable, royalty-free basis to BMJ Publishing Group Ltd ("BMJ") its licensees and where the relevant Journal is co-owned by BMJ to the co-owners of the Journal, to publish the Work in this journal and any other BMJ products and to exploit all rights, as set out in our [licence](#).

The Submitting Author accepts and understands that any supply made under these terms is made by BMJ to the Submitting Author unless you are acting as an employee on behalf of your employer or a postgraduate student of an affiliated institution which is paying any applicable article publishing charge ("APC") for Open Access articles. Where the Submitting Author wishes to make the Work available on an Open Access basis (and intends to pay the relevant APC), the terms of reuse of such Open Access shall be governed by a Creative Commons licence – details of these licences and which [Creative Commons](#) licence will apply to this Work are set out in our licence referred to above.

Other than as permitted in any relevant BMJ Author's Self Archiving Policies, I confirm this Work has not been accepted for publication elsewhere, is not being considered for publication elsewhere and does not duplicate material already published. I confirm all authors consent to publication of this Work and authorise the granting of this licence.

1  
2  
3 1 The burden of lower respiratory infections and associated risk factors across regions in Ethiopia:  
4 2 A subnational analysis of the Global Burden of Diseases 2019 Study

5  
6  
7 3 Ethiopia Subnational-Level Lower Respiratory Infections Burden collaborators

8  
9 4 Amanuel Yigezu\*,<sup>1</sup> Awoke Misganaw\*,<sup>2,1</sup> Fentabil Getnet,<sup>1,3</sup> Tezera Moshago Berheto,<sup>4</sup> Ally  
10 5 Walker,<sup>5</sup> Ababi Zergaw,<sup>6,1</sup> Firehiwot Abebe Gobena,<sup>7</sup> Muluken Argaw Haile,<sup>8</sup> Alemayehu  
11 6 Hailu,<sup>9</sup> Solomon Tessema Memirie,<sup>10</sup> Dereje Mengistu Tolosa,<sup>11</sup> Semagn Mekonnen Abate,<sup>12</sup>  
12 7 Mesafint Molla Adane,<sup>13</sup> Gizachew Tadesse Akalu,<sup>14,15</sup> Addis Aklilu,<sup>16</sup> Dejene Tsegaye  
13 8 Alem,<sup>17</sup> Zeleke Gebru,<sup>18</sup> Mulusew Andualem Asemahagn,<sup>19</sup> Daniel Atlaw,<sup>20</sup> Tewachew  
14 9 Awoke,<sup>21</sup> Hunegnaw Abebe,<sup>22</sup> Melaku Ashagrie Belete,<sup>23</sup> Tekleberhan Hailemariam,<sup>24</sup> Alemeshet  
15 10 Yirga,<sup>25</sup> Setognal Birara Aychiluhm,<sup>26</sup> Belay Boda Abule Bodicha,<sup>27</sup> Chuchu Churko,<sup>18</sup> Feleke  
16 11 Mekonnen Demeke,<sup>21</sup> Abebaw Alemayehu Desta,<sup>28</sup> Lankamo Ena,<sup>29</sup> Tahir Eyayu,<sup>30</sup> Zinabu  
17 12 Fentaw,<sup>31</sup> Daniel Baza Gargamo,<sup>32</sup> Mesfin Damtew Gebrehiwot,<sup>33</sup> Mathewos Alemu  
18 13 Gebremichael,<sup>34</sup> Melaku Getachew,<sup>35</sup> Getahun Molla,<sup>36</sup> Biniyam Sahiledengle,<sup>37</sup> Bereket  
19 14 Beyene,<sup>38</sup> Migbar Sibhat,<sup>39</sup> Negussie Boti Sidamo,<sup>18</sup> Damtew Solomon,<sup>40</sup> Yonatan Solomon,<sup>41</sup>  
20 15 Birhanu Wagaye,<sup>42,43</sup> Shambel Wedajo,<sup>22</sup> Melat Weldemariam,<sup>16</sup> Yazachew Yismaw,<sup>44,45</sup>  
21 16 Mohsen Naghavi.<sup>5,2</sup>

22  
23  
24  
25  
26 17 \*Joint first authors

27  
28 18 **Affiliations**

29  
30  
31 19 <sup>1</sup>National Data Management Center for Health (NDMC), Ethiopian Public Health Institute,  
32 20 Addis Ababa, Ethiopia; <sup>2</sup>Department of Health Metrics Sciences, School of Medicine, University  
33 21 of Washington, Seattle, WA, USA; <sup>3</sup>Department of Epidemiology, Jigjiga University, Jigjiga,  
34 22 Ethiopia; <sup>4</sup>HIV and TB Research Directorate, Ethiopian Public Health Institute, Addis Ababa,  
35 23 Ethiopia; <sup>5</sup>Institute for Health Metrics and Evaluation, University of Washington, Seattle, WA,  
36 24 USA; <sup>6</sup>Department of Health Systems and Policy, Addis Ababa University, Addis Ababa,  
37 25 Ethiopia; <sup>7</sup> Ethiopian Health Insurance Service, Addis Ababa, Ethiopia; <sup>8</sup>Program Section,  
38 26 Ethiopian Health Insurance Service, Addis Ababa, Ethiopia; <sup>9</sup>Department of Global Public  
39 27 Health and Primary Care, University of Bergen, Bergen, Norway; <sup>10</sup>Addis Center for Ethics and  
40 28 Priority Setting, Addis Ababa University, Addis Ababa, Ethiopia; <sup>11</sup>Ethiopian Health Insurance  
41 29 Service, Ministry of Health, Addis Ababa, Ethiopia; <sup>12</sup>Department of Anesthesiology, Dilla  
42 30 University, Addis Ababa, Ethiopia; <sup>13</sup>College of Medicine and Health Sciences, Bahir Dar  
43 31 University, Bahir Dar, Ethiopia; <sup>14</sup>Department of Microbiology, Immunology and Parasitology,  
44 32 St. Paul's Hospital Millennium Medical College, Addis Ababa, Ethiopia; <sup>15</sup>Department of  
45 33 Microbial, Cellular and Molecular Biology, Addis Ababa University, Addis Ababa, Ethiopia;  
46 34 <sup>16</sup>Department of Medical Laboratory Sciences, Arba Minch University, Arba Minch, Ethiopia;  
47 35 <sup>17</sup>Department of Nursing, Debre Markos University, Debre Markos, Ethiopia; <sup>18</sup>School of Public  
48 36 Health, Arba Minch University, Arba Minch, Ethiopia; <sup>19</sup>School of Public Health, Bahir Dar  
49 37 University, Bahir Dar, Ethiopia; <sup>20</sup>Department of Biomedical Science, Madda Walabu  
50 38 University, Bale Robe, Ethiopia; <sup>21</sup>Department of Medical Laboratory Sciences, Bahir Dar  
51 39 University, Bahir Dar, Ethiopia; <sup>22</sup>Department of Public Health, Wollo University, Dessie,

1  
2  
3 40 Ethiopia; <sup>23</sup>Department of Medical Laboratory Sciences, Wollo University, Dessie, Ethiopia;  
4 41 <sup>24</sup>Department of Medical Physiology, Mekelle University, Mekelle, Ethiopia; <sup>25</sup>School of Health  
5 42 Science, Bahir Dar University, Bahir Dar, Ethiopia; <sup>26</sup>Department of Public Health, Samara  
6 43 University, Samara, Ethiopia; <sup>27</sup>Department of Biomedical Sciences , Arba Minch University,  
7 44 Arba Minch, Ethiopia; <sup>28</sup>Department of Surgical Nursing, University of Gondar, Gondar,  
8 45 Ethiopia; <sup>29</sup>Department of Comprehensive Nursing, Arba Minch University, Arba Minch,  
9 46 Ethiopia; <sup>30</sup>Department of Medical Laboratory Sciences, Debre Tabor University, Debre Tabor,  
10 47 Ethiopia; <sup>31</sup>Department of Epidemiology and Biostatistics, Wollo University, Dessie, Ethiopia;  
11 48 <sup>32</sup>Department of Pediatrics and Neonatal Nursing, Wolaita Sodo University, Wolaita Sodo,  
12 49 Ethiopia; <sup>33</sup>Department of Environmental Health, Wollo University, Dessie, Ethiopia;  
13 50 <sup>34</sup>Department of Epidemiology and Biostatistics, Arba Minch University, Arba Minch, Ethiopia;  
14 51 <sup>35</sup>Department of Emergency and Critical Care Medicine, Haramaya University, Harar, Ethiopia;  
15 52 <sup>36</sup>Department of Epidemiology and Biostatistics, University of Gondar, Gondar, Ethiopia;  
16 53 <sup>37</sup>Department of Public Health, Madda Walabu University, Bale Robe, Ethiopia; <sup>38</sup>Department of  
17 54 Nursing, Arba Minch University, Arba Minch, Ethiopia; <sup>39</sup>Department of Pediatrics and Child  
18 55 Health Nursing, Dilla University, Dilla, Ethiopia; <sup>40</sup>Department of Anatomy, Madda Walabu  
19 56 University, Bale Robe, Ethiopia; <sup>41</sup>Department of Nursing, Dire Dawa University, Dire Dawa,  
20 57 Ethiopia; <sup>42</sup>College of Medicine and Health Sciences, Wollo University, Dessie, Ethiopia;  
21 58 <sup>43</sup>Water, Sanitation and Hygiene Unit, Ethiopian Public Health Institute, Addis Ababa, Ethiopia;  
22 59 <sup>44</sup>Department of Pharmacology, Bahir Dar University, Bahir Dar, Ethiopia; <sup>45</sup>Pharmacy  
23 60 Department, Alkan Health Science, Business and Technology College, Bahir Dar, Ethiopia.

24  
25  
26  
27  
28  
29  
30  
31 61 Corresponding Author: Amanuel Yigezu; [yigezuamanuel@yahoo.com](mailto:yigezuamanuel@yahoo.com)

32  
33 62 Submitting Author: Awoke Misganaw

34  
35 63 - Main text word count: Current: 4487

36  
37  
38 64

39  
40  
41 65

42  
43 66

44  
45 67

46  
47  
48 68

49  
50 69

51  
52 70

53  
54  
55 71



1  
2  
3  
4  
5  
6  
7  
8  
9  
10  
11  
12  
13  
14  
15  
16  
17  
18  
19  
20  
21  
22  
23  
24  
25  
26  
27  
28  
29  
30  
31  
32  
33  
34  
35  
36  
37  
38  
39  
40  
41  
42  
43  
44  
45  
46  
47  
48  
49  
50  
51  
52  
53  
54  
55  
56  
57  
58  
59  
60

72

For peer review only

## 73 Abstract

74 **Objective:** This analysis is to present the burden and trends of morbidity and mortality due to  
75 lower respiratory infections, their contributing risk factors, and the disparity across  
76 administrative regions and cities from 1990 to 2019.

77 **Design:** This analysis used Global Burden of Disease 2019 framework to estimate morbidity and  
78 mortality outcomes of lower respiratory infection and its contributing risk factors. The Global  
79 Burden of Disease study uses all available data sources and Cause of Death Ensemble model to  
80 estimate deaths from lower respiratory infection and a Meta-Regression Disease Modeling  
81 technique to estimate lower respiratory infection non-fatal outcomes with 95% uncertainty  
82 intervals.

83 **Study setting:** The study includes nine region states and two chartered cities of Ethiopia

84 **Outcome Measures:** We calculated incidence, death, and years of life lost (YLLs) due to LRIs  
85 and contributing risk factors using all accessible data sources. We calculated 95% uncertainty  
86 intervals (UI) for the point estimates.

87 **Results:** In 2019, LRIs incidence, death, and YLLs among all age groups were 8,313.7 (95% UI:  
88 7,757.6–8,918), 59.4 (49.8–71.4) and 2,404.5 (2059.4–2833.3) per 100,000 people, respectively.  
89 From 1990, the corresponding decline rates were 39%, 61%, and 76%, respectively. Children  
90 under the age of five years account for 20% of episodes, 42% of mortalities, and 70% of the YLL  
91 of the total burden of LRIs in 2019. The mortality rate was significantly higher in predominantly  
92 pastoralist regions—Benishangul-Gumuz 101.8 (84.0–121.7) and Afar 103.7 (86.6–122.6). The  
93 Somali region showed the least decline in mortality rates. More than three-fourths of under-five  
94 child deaths due to LRIs were attributed to malnutrition. Household air pollution from solid fuel  
95 attributed to nearly half of the risk factors for all age mortalities due to LRIs in the country.

1  
2  
3 96 **Conclusion:** In Ethiopia, LRIs have reduced significantly across the regions over the years  
4  
5 97 (except in elders), however are still the third leading cause of mortality, disproportionately  
6  
7 98 affecting children younger than five years old, and predominantly pastoralist regions.  
8  
9  
10 99 Interventions need to consider leading risk factors, targeted age groups and pastoralist and cross-  
11  
12 100 border communities.

13  
14  
15 101 **Keywords:** *Lower respiratory infections, regions, chartered cities, Ethiopia*

### 16 17 18 102 **Strengths and limitations of this study**

- 19  
20  
21 103 • The analysis has considered political, government and administrative changes of regional  
22  
23 104 states and cities over the years to map available data and populations
- 24  
25  
26  
27 105 • The analysis used all available data identified through an extensive collaboration effort and  
28  
29 106 involving more than 700 leading researchers and policy makers from Ethiopia
- 30  
31  
32  
33 107 • When data were not available for a particular regional states or city, the modelling process  
34  
35 108 used data from other locations borrowing strength from geographic locations and time, and  
36  
37 109 use predictive covariates
- 38  
39  
40  
41 110 • However, limited quality data availability and accessibility for the analysis resulted in wider  
42  
43 111 95% Uncertainty Intervals which largely affect policy debates, prioritization, and health  
44  
45 112 decisions.

### 46 47 48 113 **INTRODUCTION**

49  
50  
51  
52 114 Lower Respiratory Infections (LRIs) have been a predominant health problem worldwide,  
53  
54 115 causing more than 2.3 million deaths in 2016 alone, amounting to a mortality rate of 32.2 per

1  
2  
3 116 100,000 people (1). LRIs comprise diseases of the lower airways such as pneumonia, bronchitis,  
4  
5 117 and bronchiolitis, among others (2). Nearly all (99%) of LRI deaths occur in low- and middle-  
6  
7 118 income countries and highly affect children under the age of five years (3). In sub-Sahara  
8  
9 119 African countries, the mortality rate is 66.4 per 100,000 people, which is four times the mortality  
10  
11 120 rate in East Asia and twice the global average (2).

12  
13  
14 121 Ethiopia ranked in the top three African countries in the number of under-five child deaths from  
15  
16 122 LRIs (4). To prevent child death from LRIs and other diseases in early life, Ethiopia has been  
17  
18 123 implementing the “Integrated Management of Childhood Illness” program since 1997 later  
19  
20 124 scaled up to the national level in 2007 (5). LRIs, and pneumonia in particular, have been among  
21  
22 125 the top three leading causes of childhood mortality in the country (6). Among LRIs’ aetiologies,  
23  
24 126 S. pneumonia contributed to more deaths than the other LRIs aetiologies combined (3). In 2011,  
25  
26 127 the country introduced 10-valent pneumococcal conjugate vaccine (PCV 10) into its national  
27  
28 128 immunization program to reduce the burden of Streptococcal pneumonia (7).

29  
30  
31 129 Morbidity and mortality from LRIs are attributable to multiple underlying factors. Malnutrition  
32  
33 130 is one of the main underlying risk factors (8, 9). The other main attributable factor are poor  
34  
35 131 living conditions that include household crowding, parental smoking, high use of household solid  
36  
37 132 fuel/biomass consumption, poor ventilation, and lack of hand-washing facilities (10-12). In  
38  
39 133 addition, bottle feeding also contributes to the burden of LRIs in children (13).

40  
41  
42 134 The flagship Ethiopian Health Extension Program (HEP) has been the backbone of the country’s  
43  
44 135 health system strategies to reduce the burden of LRIs and other diseases through preventive and  
45  
46 136 health promotion activities at the community level. The HEP has also improved broader access  
47  
48 137 to health care, availability of essential antibiotics, and immunization mainly to the rural  
49  
50 138 population since 2004 (14). In 2010, the country also introduced the “integrated community case  
51  
52  
53  
54  
55  
56  
57  
58  
59  
60

1  
2  
3 139 management” (ICCM) approach to treat pneumonia through trained health cadres of health  
4  
5 140 extension workers (HEWs) implementing HEP (15).

6  
7  
8 141 Currently, Ethiopia is implementing its Health Sector Transformation Plan-2 (HSTP-2) which is  
9  
10 142 adapted from the Sustainable Development Goals. Some of the aims include increasing the  
11  
12 143 proportion of under-five children with pneumonia who received antibiotics from 48% to 69%  
13  
14 144 and improving full vaccination coverage from 44% to 69% between 2020 and 2025 (16).  
15  
16 145 Commitment to international goals such as The Global Action Plan for the Prevention and  
17  
18 146 Control of Pneumonia and Diarrhoea by 2025 could be reached if enough investment is made in  
19  
20 147 high LRI burden countries like Ethiopia (17).

21  
22  
23 148 As Ethiopia is a country of stark contrasts in socioeconomic, epidemiological, and geographical  
24  
25 149 variations, estimating disease burden at the regional level could provide valid and reliable  
26  
27 150 information to inform policy decisions, including efficient resource allocation to match the  
28  
29 151 burden in the subnational states. Hence, this article presents the 2019 Global Burden of Diseases,  
30  
31 152 Injuries, and Risk Factors study (GBD) results on the burden, trends and regional variations of  
32  
33 153 LRIs in Ethiopia from 1990 to 2019.

## 34 35 36 37 38 154 **METHODS**

### 39 40 41 42 155 **Study Setting**

43  
44  
45 156 Ethiopia is the second-most populous country in Africa next to Nigeria, with an estimated  
46  
47 157 population of 112 million in 2019 (18). More than half of the country's population is under 20,  
48  
49 158 and over 80% of the population resides in rural areas (19). The country is subdivided into ten  
50  
51 159 regional states (Afar, Amhara, Benishangul-Gumuz, Gambella, Harari, Oromia, Somali, Sidama,  
52  
53 160 Southern Nations and Nationalities and Peoples (SNNP), and Tigray) and two chartered cities  
54  
55  
56  
57  
58  
59  
60

1  
2  
3 161 (Addis Ababa and Dire Dawa). During this study, Sidama was a zonal administration under the  
4  
5 162 SNNP region. Oromia, Amhara, and SNNP are the highly populated regions. In this study, we  
6  
7 163 classified the regions into urban (Addis Ababa, Dire Dawa, and Harari), agrarian (Oromia,  
8  
9 164 Amhara, SNNP, Tigray), and pastoralist (Benishangul-Gumuz, Afar, Gambella, and Somali).  
10  
11 165 The socio-economy of the regions such as income per person, educational attainment, and total  
12  
13 166 fertility rate (TFR) varies as measured in socio-demographic index (SDI) (20) (Figure 1).  
14  
15  
16  
17  
18

19 168 The healthcare system of the country is a three-tiered system consisting of primary, secondary,  
20  
21 169 and tertiary levels of healthcare delivery units with 21,154 functioning health facilities and  
22  
23 170 159,545 health workforce in 2019 (16). The primary health care unit (PHCU) consists of health  
24  
25 171 posts (staffed by HEWs), health centres, and primary hospitals. The secondary level of care  
26  
27 172 consists of general hospitals and the tertiary level of care includes national referral hospitals  
28  
29 173 which provide specialized services (16).  
30  
31  
32  
33

#### 34 174 **Data Sources and Analysis**

35  
36

37 175 The analysis and findings of LRIs presented in this analysis were produced by the Ethiopia  
38  
39 176 Subnational Burden of Disease Initiative, a collaborative endeavour between the National Data  
40  
41 177 Management Center for Health (NDMC) at the Ethiopian Public Health Institute (EPHI) and the  
42  
43 178 Institute for Health Metrics and Evaluation (IHME), as part of GBD. The details of the  
44  
45 179 methodology were described elsewhere (21). In brief, woreda (district) level geographic  
46  
47 180 boundary mapping of regions and cities was used because woredas were relatively stable  
48  
49 181 government structures (compared to lower or higher level administrative structures) during  
50  
51 182 political or government changes and through the three census years (1984, 1994, and 2007).  
52  
53 183 First, the analysis was estimated by mapping population and demography at the district level by  
54  
55  
56  
57  
58  
59  
60

1  
2  
3 184 time and region. Then, the data sources were mapped by regions before processing the data in the  
4  
5 185 GBD analysis based on GBD protocol. EPHI, in collaboration with IHME, gathered all  
6  
7  
8 186 accessible data sources by location for Ethiopia and all regions and cities that included census,  
9  
10 187 demographic surveillance, household surveys, diseases registry, health service utilization,  
11  
12 188 disease notification, and other data for this analysis. A comprehensive description of data  
13  
14  
15 189 sources, quality, and modelling for GBD 2019 has been reported on the following online portal:  
16  
17 190 (<http://ghdx.healthdata.org/gbd-2019/data-input-sources>). This study outputs predates the  
18  
19 191 COVID-19 and civil war occurred in the northern and other parts of the country and does not  
20  
21  
22 192 include the impact of COVID-19 or civil war.

### 23 24 25 193 **GBD Methods and Tools**

26  
27  
28 194 The GBD details are reported elsewhere (22). Diseases and injuries within the GBD were  
29  
30  
31 195 organized into levels: Level 1 being the broadest causes of death and disability to Level 4 being  
32  
33 196 the most specific. Within the three Level 1 causes (communicable, maternal, neonatal, and  
34  
35 197 nutritional diseases; non-communicable diseases; and injuries), there were 174 Level 3 causes.  
36  
37  
38 198 The GBD 2019 study has estimated the burden of disease, including LRIs, for Ethiopia's national  
39  
40 199 and subnational states. LRIs comprise diseases of the lower airways such as pneumonia,  
41  
42 200 bronchitis, and bronchiolitis, among others (2). LRI mortality was estimated by age, sex,  
43  
44  
45 201 geography, and year using a modelling platform called the Cause of Death Ensemble model. LRI  
46  
47 202 morbidity, including incidence, was modelled using a meta-regression platform known as  
48  
49 203 DisMod-MR, a Bayesian, hierarchical, mixed-effects meta-regression platform (23). Years of life  
50  
51 204 lost (YLLs) were computed by multiplying cause-specific deaths by the life expectancy at the  
52  
53  
54 205 age of death (24, 25). Population risk assessments over time and among risks were estimated  
55  
56 206 using the comparative risk assessment approach developed for the GBD study (26, 27). The

1  
2  
3 207 GBD risk factors were categorized as follows: Level 1 risk factors are behavioural,  
4  
5 208 environmental, occupational, and metabolic; Level 2 risk factors include 20 clusters of risks;  
6  
7 209 Level 3 consists of 52 clusters of risks; and Level 4 contains 69 specific risk factors. All metrics  
8  
9 210 were estimated separately for Ethiopia's nine regions and two chartered cities, and are presented  
10  
11 211 with their 95% uncertainty intervals (UIs). All estimates produced for GBD report 95%  
12  
13 212 uncertainty intervals (UIs) that account for sampling and non-sampling error associated with data  
14  
15 213 and various assumptions of the modelling process and are derived from the 2.5th and 97.5th  
16  
17 214 percentiles of 1000 draws(22, 28).

## 215 **Presentation of results**

216 We present the burden of LRIs in Ethiopia and its regional states using incidence, deaths, and  
217 YLLs categorized by sex, age groups, and year. We used numbers, rates, and percent change for  
218 the quantification of the burden. We also estimated the risk factors contributing to LRIs in  
219 Ethiopia and the percent change between 1990 and 2019. We reported GBD causes and risk  
220 factors using level 3 classifications, with 95% Uncertainty Intervals (UI). Additional tables and  
221 figures are attached in the supplementary materials.

## 222 **Patient and public involvement**

223 Patients and the public were not involved in the design of the study.

## 224 **RESULTS**

### 225 **Morbidity Due to LRIs**



1  
2  
3 226 In 2019, an estimated 6,628,673.6 (95% UI: 6,108,786.2–7,230,986.3) new cases of LRIs  
4  
5 227 occurred in Ethiopia resulting in an age-standardized incidence rate of 8,313.7 per 100,000  
6  
7 228 people (7,757.6–8,918). Out of the total LRI episodes, 22% (1,448,680.0 new cases  
9  
10 229 [1,150,089.8–1,799,704.4]) of new cases occurred among children younger than 5 years, yielding  
11  
12 230 an annual incidence rate of 8,685.0 per 100,000 children (6,895.1–10,789.8). In adults older than  
13  
14 231 70 years, there were 725,273.3 (640,315.4–837,746.3) new cases of LRIs with an annual  
15  
16 232 incidence of 38,394.4 per 100,000 people (33,896.9–44,348.5) (Figure 2; Supplemental Table 1  
17  
18 233 and Table 2).

19  
20  
21 234 Compared to national estimates, a significantly lower age-standardized incidence rate of LRIs  
22  
23 235 per 100,000 people was observed in the chartered cities (6,788.1 [6,285.1–7,339.1] in Addis  
24  
25 236 Ababa, 7,148.8 [6,634.6–7,750.7] in Dire Dawa), and in Harari region (7,190.5 [6,684.1–  
26  
27 237 7,718.6]). The highest rates of age-standardized incidence per 100,000 people were observed in  
28  
29 238 Afar (9,350.2 [8,648.8–10,157.4]), Somali (9,220.0 [8,515.9–10,046.4]), and Benishangul-  
30  
31 239 Gumuz (9,054.6 [8,394.2–9,766.0]) although not significant compared to the national estimate  
32  
33 240 (Figure 2; Supplemental Figure 1 and Table 2).

34  
35  
36  
37 241 In children younger than 5 years, the lowest incidence rates were observed in Addis Ababa  
38  
39 242 (4,927.2 [3,812.5–6,231.8]), Harari (6,821.6 [5,373.5–8,607.3]), and Gambella (6,791.1  
40  
41 243 [5,370.4–8460.1]) per 100,000 people, substantially below the national estimate. The highest  
42  
43 244 incidence of LRIs per 100,000 children were recorded in Benishangul-Gumuz (10,481.8  
44  
45 245 [8,269.5–13,219.0]), Somali (10,062.7 [7,949.6–12,802.8]), Afar (9,365.5 [7,421.7–11,714.7]),  
46  
47 246 and Oromia (9,039.4 [7,080.5–11,277.7]).

48  
49  
50  
51  
52 247 The age-standardized decline rate between 1990 and 2019 was 39% for both sexes, and it was  
53  
54 248 56% in under-five children and 13% in adults older than 70. The lowest decline in age-

1  
2  
3 249 standardized incidence rate was in Somali (19%); while it was between 38% and 44% for the  
4  
5 250 remaining regions (Supplemental Table 2).

6  
7  
8 251 In children younger than 5, the incidence rates increased slightly between 1990 and 1995, except  
9  
10 252 in Addis Ababa and Amhara region. The highest decline rates were found between the years  
11  
12 253 2005 and 2015 across all regions (Supplemental Figure 2).

### 15 254 **Mortality due to LRIs**

16  
17  
18  
19 255 In 2019, LRIs caused 46,300.7 (95% UI: 39,515–54,642) deaths in Ethiopia, giving the age-  
20  
21 256 standardized mortality rate of 86.4 (75.3–97.6) per 100,000 people. Under-five mortality  
22  
23 257 accounted for 42% (19,591.8 [14,018.4–26,899.0]) of all deaths due to LRIs which resulted in a  
24  
25 258 mortality rate of 117.4 (84.0–161.2) per 100,000 children. Of the under-five deaths, 71%  
26  
27 259 (13,919.0 [9,946.0–18,860.0]) occurred in the first year of life. In adults older than 70 years,  
28  
29 260 LRIs caused 14,627.6 (12,393.7–16,892.8) deaths, which was a mortality rate of 774.3 (656–  
30  
31 261 894.2) deaths per 100,000 adults (Table 1; Supplemental Table 3).

32  
33  
34  
35 262 In 2019, the number of deaths in all age groups by region were highest in Oromia (18,206  
36  
37 263 [15,193–21,745]), Amhara (9525 [7,530–11872]), SNNP (9,494 [7,713–11,649]), and Somali  
38  
39 264 (3,907.5 [3,007.4–4,959.4]), followed by Tigray (2,551.4 [2,090.3–3,028.6]), Afar (706.2  
40  
41 265 [567.7–869.6]), Benishangul-Gumuz (619 [470.7–803.0]), Dire Dawa (154.6 [120.6–193.8]) and  
42  
43 266 Gambella (123.2 [98.2–151.9]). Harari (93.1 [73.8–116.0]) had the lowest number of deaths.  
44  
45 267 (Supplemental Table 3).

46  
47  
48  
49 268 Between 1990 and 2019, the age-standardized mortality rate declined by 61%, and the decline in  
50  
51 269 under-five children and adults over 70 years was 86% and 30%, respectively (Table 1 and  
52  
53 270 Supplemental Figure 3).

271 Table 1: Lower Respiratory Infections mortality rates and percentage changes between 1990 and 2019 in Ethiopia, both sexes, with different age  
272 groups

|             | Age standardized                         |                                          | Children younger than 5                    |                                            |          | People older than 70                     |                                          |          |
|-------------|------------------------------------------|------------------------------------------|--------------------------------------------|--------------------------------------------|----------|------------------------------------------|------------------------------------------|----------|
| Location    | Deaths per 100 000 people [95% UI], 1990 | Deaths per 100 000 people [95% UI], 2019 | Deaths per 100 000 children [95% UI], 1990 | Deaths per 100 000 children [95% UI], 2019 | Change,% | Deaths per 100 000 people [95% UI], 1990 | Deaths per 100 000 people [95% UI], 2019 | Change,% |
| Addis Ababa | 163.4[134.6-206.9]                       | 59.4[49.8-71.4]                          | 441.5[320.4-602.7]                         | 23.4[14.1-36.4]                            | 95       | 909.2[669.5-1264.6]                      | 503.6[410.5-633.7]                       | 45       |
| Oromia      | 241.3[188.5-292.8]                       | 89.3[75.9-103.1]                         | 920.7[629.5-1264.1]                        | 122.3[84.8-171]                            | 87       | 1174.1[842.8-1543]                       | 849.5[687.3-1009]                        | 28       |
| Amhara      | 197.7[163.5-236.5]                       | 74.3[59.4-91]                            | 691.3[531.7-883.4]                         | 94.9[55.6-146.1]                           | 87       | 1017.9[755.4-1324]                       | 682.7[537.4-857.9]                       | 33       |
| SNNPs       | 243.7[196.4-296.9]                       | 98.9[83.8-116.6]                         | 971.9[697.2-1273.2]                        | 118.4[79-168.5]                            | 88       | 1161.3[584.7-822.3]                      | 845.4[685.6-018.1]                       | 28       |
| Tigray      | 242.7[200.5-292]                         | 84.6[69.2-100.1]                         | 780.4[593.5-1009.1]                        | 67.2[43.5-98.3]                            | 92       | 1166.7[838.2-1586]                       | 788.6[637.9-956.8]                       | 33       |
| Harari      | 240.2[182.6-303.1]                       | 77[63-92.5]                              | 1146.7[730-1604.1]                         | 89.9[51.1-138]                             | 93       | 762.3[412-1223.7]                        | 694.3[551.9-849]                         | 9        |
| Afar        | 244.8[186.5-316.9]                       | 103.7[86.6-122.6]                        | 723.7[481.5-1023.7]                        | 101.7[65-152.4]                            | 86       | 1010[658-1541.7]                         | 917.6[720.6-146.8]                       | 10       |
| Somali      | 147.6[113.8-192.6]                       | 97.5[79.2-118.6]                         | 455.9[313-628.5]                           | 197.3[135-279.8]                           | 57       | 798.8[519.2-1177.6]                      | 765.1[588.8-972.4]                       | 5        |
| BG          | 284.1[221.8-358.1]                       | 101.8[84-121.7]                          | 1266.4[846.7-790.9]                        | 215.1[141.4-311]                           | 84       | 975.3[656.5-1379.3]                      | 671.9[532.7-848.7]                       | 32       |
| Dire Dawa   | 220.1[171.6-270.9]                       | 69.9[56.5-84]                            | 1084.2[689.1-503.2]                        | 83.7[44.7-135.9]                           | 93       | 868.7[604.5-1205.5]                      | 621.3[496.4-766.1]                       | 29       |
| Gambella    | 231.5[176.8-297.4]                       | 82.4[68.3-97.1]                          | 1265.5[805.4-764.3]                        | 57[32.4-89.6]                              | 96       | 739.6[477.7-1074.9]                      | 678.3[540.4-835.3]                       | 9        |
| Ethiopia*   | 223[184.7-264.3]                         | 86.4[75.3-97.6]                          | 822.2[635-1051.2]                          | 117.4[84-161.2]                            | 86       | 1092.3[844-1391.5]                       | 774.3[656-894.2]                         | 30       |

273 N.B: all changes are in decreasing percent. SNNPs: Southern Nations, Nationalities, and Peoples; BG: Benishangul-Gumuz; \*national estimate

274

275

1  
2  
3 276 In Ethiopia, the age-standardized mortality rate was higher among males (100.6 [84.1-121.4])  
4  
5 277 than females (71.8 [60.2–82.9]) (Supplemental Table 4).  
6

7  
8 278 In 1990, the age-standardized mortality rate per 100,000 people was the highest in Benishangul-  
9  
10 279 Gumuz (284.1 [221.8–358.1]), Afar (244.8 [186.5–316.9]) and SNNP (243.7 [196.4–296.9]),  
11  
12 280 although it is not significantly different from the national estimate. On the other hand, the lowest  
13  
14 281 age standardized mortality rate was exhibited in Somali (147.6 [113.8–192.6]). Although the  
15  
16 282 value was not significantly different from the national value in 1990, Addis Ababa showed the  
17  
18 283 second lowest age-standardized mortality rate (163.4 [134.6–206.9]) (Table 1).  
19  
20  
21

22 284 In 2019, the age-standardized mortality rate per 100,000 people was significantly lower in Addis  
23  
24 285 Ababa (59.4 [49.8–71.4]) when compared to other regions, although not significantly lower than  
25  
26 286 Gambella and other urban areas (Harari and Dire Dawa). Dire Dawa showed a significantly  
27  
28 287 lower age-standardized mortality rate when compared to Benishangul-Gumuz, Afar, and SNNP.  
29  
30 288 Compared to the national estimate, the regions of Afar (103.7 [86.6–122.6]) and Benishangul-  
31  
32 289 Gumuz (101.8 [84.0–121.7]) recorded the highest age-standardized mortality rates per 100,000  
33  
34 290 people, although the difference is not statistically significant (Table 1). Compared to the 1990s,  
35  
36 291 there was a 58% to 68% decrease in the age-standardized mortality rates across all regions.  
37  
38 292 However, the Somali region recorded a 34% reduction in mortality rates (Supplemental Figure  
39  
40  
41 293 3).  
42  
43  
44  
45

46 294 Among children below the age of five, the mortality rate per 100,000 people was significantly  
47  
48 295 lower in Addis Ababa (23.4 ([14.1–36.4]) than other regions, although it was not significantly  
49  
50 296 less than Gambella in 2019. The mortality rate was the highest in Benishangul-Gumuz (215.1  
51  
52 297 [141.4–311.0]), Somali (197.3 [135.2–279.8]), and Oromia (122.3 [84.8–171.0]) despite being  
53  
54 298 not significantly higher than the national estimate (Table 1). Dire Dawa showed a significantly  
55  
56  
57  
58  
59  
60

1  
2  
3 299 lower mortality rate than Benishangul-Gumuz and Somali. Harari had a significantly lower  
4  
5 300 mortality rate than Benishangul-Gumuz. For all regions, the mortality rate declined for children  
6  
7 301 younger than 5-years between 1990 and 2019 by between 84% (in Benishangul-Gumuz) and  
8  
9 302 96% (in Gambella), except in Somali, which showed a 57% decline (Table 1). The mortality rate  
10  
11 303 increased slightly between 1990 and 1995 and between 2010 and 2015 in Somali region  
12  
13 304 (Supplemental Figure 4).  
14  
15

16  
17 305 The mortality rate in adults older than 70 was the lowest in Addis Ababa (503.6 [410.5–633.7]).  
18  
19 306 Other regions and cities have not shown a statistically significant difference from the national  
20  
21 307 estimate. The decline in mortality rates between 1990 and 2019 is below 50% across all regions  
22  
23 308 (Table 1). The mortality rate increased in Afar and Somali between 2005 and 2019 and in  
24  
25 309 Gambella between 1990 and 2005 (Supplemental Figure 5).  
26  
27  
28  
29

### 30 **Premature Mortality due to LRIs**

31  
32

33 311 In 2019, premature death due to LRIs was 2,445,093.7 (95% UI: 1,934,420.8–3,119,838.6)  
34  
35 312 YLLs, yielding an age-standardized rate of 2404.5 per 100,000 people (2059.4–2833.3).  
36  
37 313 Compared to 1990, the age-standardized YLL rate declined by 76% in 2019. In parallel, 70% of  
38  
39 314 all premature mortality occurred in children younger than five, which accounted for 1,721,122.3  
40  
41 315 (1,231,032.1–2,362,958.7) YLLs. The YLL rate of 72,055.4 (55,718.5–92,064) per 100,000  
42  
43 316 under-five children in 2019 declined by 86% compared to the YLL rate in 1990. Adults over 70  
44  
45 317 years contributed 8% of all YLLs due to LRIs (194,756.2 [165,462.0–225,502.1]), yielding a rate  
46  
47 318 of 10,309.9 (8759.2–11,937.6) YLLs per 100,000 people (Table 2; Supplemental Table 5 and  
48  
49 319 Table 6).  
50  
51  
52  
53  
54  
55  
56  
57  
58  
59  
60

1  
2  
3 320 Compared to 1990, the number of YLLs has decreased by 70% in all age groups and by 76% in  
4  
5 321 children younger than five in 2019. However, the number of YLLs has increased by 45% in  
6  
7 322 adults older than 70 (Supplemental Table 5).

8  
9  
10 323 The age-standardized YLL rate was significantly lower in Addis Ababa (1,285.6 [1,065–  
11  
12 324 1,561.8]) in 2019 compared to the national average. The highest age standardized YLL rate were  
13  
14 325 in Benishangul-Gumuz (3,571.1 [2,772.4–4,510.7]), Somali (3,236.4 [2,537.4–4,006]), and Afar  
15  
16 326 (2,824.6 [2,323–3,414]), although not statistically significant compared to the national estimate  
17  
18 327 (Table 2).

19  
20  
21  
22 328 In children younger than five years, Addis Ababa (2,069 [1,253–3,217.5]) had a significantly  
23  
24 329 lower YLL rate than the national estimate. The YLL rate was observed to be the lowest in  
25  
26 330 Gambella (5,031.8 [2,867.2–7,885.7]), although not significantly lower than the national  
27  
28 331 estimate (Table 2).

29  
30  
31  
32 332  
33  
34  
35  
36  
37  
38  
39  
40  
41  
42  
43  
44  
45  
46  
47  
48  
49  
50  
51  
52  
53  
54  
55  
56  
57  
58  
59  
60

333 Table 2: Lower Respiratory Infections YLL rates and percentage changes between 1990 and 2019 in Ethiopia, both sexes, with different age
334 groups

Table with 9 columns: Locatio n, Age-standardized (YLL per 100,000 people, 1990 and 2019), Children younger than 5 years (YLL per 100,000 people, 1990 and 2019, Change, %), and People older than 70 (YLL per 100,000 people, 1990 and 2019, Change, %). Rows include Addis Ababa, Oromia, Amhara, SNNPs, Tigray, Harari, Afar, Somali, BG, Dire Dawa, Gambella, and Ethiopia\*.

335 SNNPs: Southern Nations, Nationalities, and Peoples; BG: Benishangul-Gumuz; \*national estimate

336

1  
2  
3 337 The age-standardized premature mortality rate between 1990 and 2019 showed a continuous  
4  
5 338 decline in all regions, except Somali. Benishangul-Gumuz showed the highest burden between  
6  
7  
8 339 1990 and 2019 (Figure 3).  
9

10  
11 340 The change in premature mortality in children younger than five was significant throughout the  
12  
13 341 years. However, the reduction in premature mortality among adults older than 70 was not as  
14  
15 342 significant (Supplemental Figure 6 and Figure 7).  
16  
17

### 18 343 **Risk Factors**

19  
20  
21  
22 344 Across all population groups, about half (48%) of the mortalities (measured in rates) due to LRIs  
23  
24 345 in Ethiopia were attributed to household air pollution from solid fuel. In addition, lack of access  
25  
26 346 to a hand-washing facility (23%), childhood wasting (23%), low birth weight (9%), short  
27  
28 347 gestation period (7%), and ambient particulate matter pollution (6%) were also risk factors for  
29  
30 348 mortality due to LRIs. The contribution of the risk factors to death due to LRIs in all regions was  
31  
32 349 similar to the national estimate, except in Addis Ababa, where lack of access to hand-washing  
33  
34 350 facilities, ambient particulate matter pollution, and low temperature were the main contributing  
35  
36 351 factors. Ambient particulate matter pollution was also relatively higher in Dire Dawa, Harari,  
37  
38 352 and Tigray regions (Supplemental Figure 8).  
39  
40  
41  
42

43 353 In children younger than five, more than three-fourths of deaths due to LRIs were attributed to  
44  
45 354 childhood wasting (54%) stunting (12%), and child underweight (10%) in Ethiopia. In addition,  
46  
47 355 50% of the LRIs mortalities were attributed to household air pollution from solid fuel. Lack of  
48  
49 356 access to hand-washing facilities (23%), low birth weight (23%), short gestation period (17%),  
50  
51 357 high (4%) or low temperature (4%), absence of exclusive breastfeeding (4%) were also the risk  
52  
53 358 factors with evident contribution. The distribution of risk factors varied among the regions. Child  
54  
55  
56  
57  
58  
59  
60



1  
2  
3 359 wasting, low birth weight, and pre-term birth were the contributing factors of mortality in Addis  
4  
5 360 Ababa. In Harari and Dire Dawa, child wasting, lack of access to hand-washing facilities, pre-  
6  
7 361 term birth, and household air pollution from solid fuels contributed more to the death from LRIs  
8  
9 362 than the other risk factors in 2019. All the risk factors except for ambient particulate air matter  
10  
11 363 and low temperature were the highest in Somali and Benishangul-Gumuz (Supplemental Figure  
12  
13 364 9). When we examine the trend from 1990 to 2019, there is no significant reduction in the risk  
14  
15 365 factors (Supplemental Figure 10).

## 20 366 **Discussion**

21  
22  
23 367 The findings from this study indicate that although the burden of LRIs, measured in incidence or  
24  
25 368 mortality rates, have shown a significant decline, they are still the third leading cause of death  
26  
27 369 after neonatal disorders and diarrheal diseases in 2019 in Ethiopia. Cities and predominantly  
28  
29 370 urban areas had lower mortality rates than predominantly pastoralist regions of the country. The  
30  
31 371 rate of decline in mortality between 1990 and 2019 varied slightly across regions and chartered  
32  
33 372 cities. The mortality rate decreased by more than three-fourths among children under the age of  
34  
35 373 five and only by one-third among adults older than 70 between 1990 and 2019. Half of LRIs  
36  
37 374 mortalities are attributed to household air pollution from solid fuels in all age groups. About  
38  
39 375 three-fourths of LRIs in children were attributed to malnutrition.

40  
41  
42 376 The mortality rate of LRIs among children below the age of five has declined by 86% between  
43  
44 377 1990 and 2019. This decline could be attributed to improvements in living conditions, access to  
45  
46 378 healthcare, and immunization. The national health delivery infrastructure has grown from 2,600  
47  
48 379 health facilities in 1997 to 21,154 facilities, including 314 hospitals, 3,678 health centers, and  
49  
50 380 17,162 health posts and private health facilities in 2019. As a result, the health workforce has  
51  
52  
53  
54  
55  
56  
57  
58  
59  
60

1  
2  
3 381 increased from 46,000 in 2007 to 159,545 in 2019 (16). The introduction of HEP since 2004 to  
4  
5 382 provide preventive, health promotion, and curative treatment for pneumonia, malaria and  
6  
7 383 diarrhoea had improved health outcomes for children (14). Moreover, Ethiopia has been  
8  
9 384 implementing holistic child health improvement programs like IMCI since 1997 (15) and ICCM  
10  
11 385 (5). Vaccination against *Streptococcus pneumoniae*, which is responsible for about half of the  
12  
13 386 LRIs mortality in African countries, with the PCV 10 vaccine since 2011 helped reduce the  
14  
15 387 burden of LRIs (4). In addition, improved socioeconomic conditions have supported the  
16  
17 388 reduction of the burden of LRIs in the country (29).

18  
19 389 Despite the achievements reached in improving child health outcomes in Ethiopia, children are  
20  
21 390 still disproportionately affected by LRIs. Out of the total burden of LRIs, 42% of all the deaths  
22  
23 391 were among children younger than five. In that regard, this study has shown that one out of ten  
24  
25 392 child deaths are due to LRIs. However, another study estimated that pneumonia alone shared  
26  
27 393 about 17% of all deaths in children younger than five years (30). Among children under five,  
28  
29 394 children younger than one carry the highest burden of LRIs. Furthermore, the mortality rate  
30  
31 395 among children younger than one (397.7 per 100,000 people) was more than nine times higher  
32  
33 396 than that of children between one and four years old (43 per 100,000 people). Although most  
34  
35 397 studies on the high burden of LRIs corroborate our findings, the findings from Global Health  
36  
37 398 Observatory (GHO) estimated a much higher mortality rate than the estimates of this study (i.e.  
38  
39 399 481.9 in children less than one year and 51.1 per 1000,000 population in children between one  
40  
41 400 and four years) (8). Although we could not explain why this variation occurs, the estimates from  
42  
43 401 GBD are also less than the estimate from findings of the Child Health Epidemiology Reference  
44  
45 402 Group (CHERG), which is primarily due to the difference in the types of data used (31).

1  
2  
3 403 Urban areas of the country, mainly Addis Ababa and Dire Dawa, had significantly lower  
4  
5 404 mortality rates than pastoralist areas such as Benishangul-Gumuz and Somali. These regional  
6  
7 405 variations could be attributed to gaps in availability and access to healthcare and socioeconomic  
8  
9 406 status differences among the subnational states. A previously conducted study indicated that  
10  
11 407 disease burden is high among people in the poorest wealth quintile and people located mainly in  
12  
13 408 Afar, Somali, Oromia, SNNP, and Benishangul-Gumuz and also have the lowest level of health  
14  
15 409 service utilization (32). The rural area of the country has less healthcare coverage and utilization  
16  
17 410 than the urban areas. The coverage of all basic vaccination is 43% in the country. Across the  
18  
19 411 regions, the coverage of all basic vaccination is lowest in Afar (20%) and highest in Addis  
20  
21 412 Ababa (83%). Coverage of pentavalent vaccines in children is 72% among the urban population  
22  
23 413 while it is 56% among the rural population (15, 30). There is a variation in the performance of  
24  
25 414 immunization across regions. Addis Ababa, Ethiopia's capital has PCV3 coverage of 93% among  
26  
27 415 1-year-olds in 2019, whereas this coverage is only 23% in Afar and Somali. The wasting rate in  
28  
29 416 Somali was 21% in children under five, while it was just 2% in Addis Ababa in 2019 (33)  
30  
31  
32  
33  
34  
35  
36 417 In addition to children, LRIs affects people older than 70 years. The number of people dying  
37  
38 418 from LRIs increased over the years in people older than 70 years, partly due to the increase in the  
39  
40 419 aging population. However, the mortality rate declined by 30% between 1990 and 2019 (3, 34).  
41  
42 420 The incidence rate did not show a significant improvement across the study years, showing only  
43  
44 421 15% reductions between 1990 and 2019. Among the regions, Somali and Afar have recorded an  
45  
46 422 increased incidence rate between 1990 and 2019. This could partly be explained by poor  
47  
48 423 accessibility and availability of health facilities in the regions (33).  
49  
50  
51  
52 424 Wasting, stunting, and underweight were major risk factors contributing to the death of children  
53  
54 425 younger than five years due to LRIs (35-37). More than 37% of children under five are stunted,  
55  
56  
57  
58  
59  
60

1  
2  
3 426 with a higher percentage in rural areas (41%) than in urban areas (26%). Similarly, the  
4  
5 427 prevalence of child underweight and wasting is 21% in the rural and 7% in the urban parts of  
6  
7 428 Ethiopia (38). This indicates that more investment is needed to reduce the burden on malnutrition  
8  
9 429 among children and in the rural parts of the country to attain better health outcomes, protecting  
10  
11 430 against LRIs. Although the prevalence of stunting, wasting, and underweight has decreased  
12  
13 431 markedly over time, they are still major risk factors for death caused by LRIs. In the Millennium  
14  
15 432 Development Goals (MDG) era, between 1990 and 2015, about half of the deaths averted due to  
16  
17 433 LRIs were attributed to improvement in the nutritional status of children (reduction in wasting  
18  
19 434 and stunting) (15).

20  
21  
22  
23  
24 435 Ambient particulate matter and household air pollution from solid fuel use were the two essential  
25  
26 436 components of air pollution. Household air pollution from solid fuel use the was the second  
27  
28 437 leading risk factor for LRIs, and ambient particulate matter is the eight leading risk factor among  
29  
30 438 the top ten risk factors for LRIs (39-41). Our analysis also showed that there is a poor progress  
31  
32 439 in the reductions of risk factors across the year, which shows there is a weak attempt in reducing  
33  
34 440 the risk factors to prevent the population from LRIs. This indicates that improved use of  
35  
36 441 electricity and natural gas for cooking and also appropriate investment in interventions that helps  
37  
38 442 to reduce these risk factors will contribute to the reduction in the burden of the LRIs. (3).

39  
40  
41  
42  
43 443 To reduce the burden of LRIs, both national and global efforts are underway. The Global Action  
44  
45 444 Plan for the Prevention and Control of Pneumonia and Diarrhoea (GAPPD), established by the  
46  
47 445 World Health Organization, set goals in 2013 to reduce child LRI mortality rates to below 3 in  
48  
49 446 1,000 live births and to reduce severe LRI incidence by 75% of the 2010 baseline by 2025. To  
50  
51 447 achieve these goals, reaching 90% of children with full-dose vaccine coverage, 90% access to  
52  
53 448 pneumonia treatment, 50% coverage of exclusive breastfeeding in the first six months, and

1  
2  
3 449 exclusive breastfeeding promotion were set as prerequisites (17). However, a 6% average annual  
4  
5 450 mortality reduction was recorded between 2000 and 2018 in Ethiopia. With this, the country can  
6  
7  
8 451 only reach the 2025 GAPPD target in 2035, ten years behind the target, according to the  
9  
10 452 Maternal and Child Epidemiology Estimation Group (MICE) estimation (30).

11  
12  
13 453 Ethiopia's major health sector strategic plan, the Health Sector Transformation Plan-2 (HSTP-2)  
14  
15 454 for the year 2021-2024, aims to reduce the infant mortality rate to 35, the neonatal mortality rate  
16  
17 455 to 21 and the children under-5 mortality rate to 43 per 1,000 live births. Similarly, the 2030  
18  
19  
20 456 Sustainable Development Goals (SDG) has set targets to reduce childhood mortality  
21  
22 457 significantly. These targets can be achieved if the country implements high-impact priority  
23  
24 458 curative and preventive interventions against LRIs (42). To achieve this, concerted action to  
25  
26  
27 459 improve policies, increase investment, foster innovations, and scale-up evidence-based  
28  
29 460 interventions has paramount importance. Parallel to this, an estimated \$274 billion for health is  
30  
31 461 required to achieve the health-related SDGs by 2030 in 67 low and middle-income countries,  
32  
33 462 including Ethiopia. One of the strategies to mobilize the needed resources is to increase  
34  
35  
36 463 government expenditure by 15% and share the population's costs through taxes or insurances  
37  
38 464 (43).

39  
40  
41 465 This study is not without limitations; limitations in the GBD methods also apply to this study and  
42  
43 466 limitations on Ethiopia subnational burden of disease that includes scarcity of quality data is  
44  
45  
46 467 published elsewhere (28).. When data on causes of death, morbidity or risk factors were not  
47  
48 468 available for a particular regional state such as Afar or Somali, GBD modelled estimates use data  
49  
50  
51 469 from other locations and predictive covariates. Data sources such as household surveys have both  
52  
53 470 sampling and non-sampling errors that account and led a wider 95% uncertainty intervals which  
54  
55 471 might compromise the accuracy of the findings and reduce the use of these findings for policy

1  
2  
3 472 decision-making (1). Causes of mortality data sources used were mainly from verbal autopsy  
4  
5 473 and sibling history having recall bias, broader category of causes of death report or poor  
6  
7 474 generalizability to regional states (44). We used the best available data identified through an  
8  
9 475 extensive collaboration effort and involving more than 700 leading researchers and policy  
10  
11 476 makers from Ethiopia. The generation of estimates and their interpretation have benefited from  
12  
13 477 intensive subnational review workshops and consultative meetings with domain experts.  
14  
15  
16  
17

## 18 478 **Conclusion**

19  
20  
21 479 Despite the substantial reduction in morbidity and mortality at national and regional states, LRIs  
22  
23 480 still remain one of the leading causes of the burden of disease in Ethiopia. Children and elders  
24  
25 481 are still disproportionately affected by LRIs. The burden of illness and death due to LRIs varies  
26  
27 482 across regional states in Ethiopia, with lower rates in cities and predominantly urban areas while  
28  
29 483 predominantly pastoralist areas of the country have higher rates. Efforts should be made to tackle  
30  
31 484 the major risk factors contributing to death by LRIs. Improving child nutrition, access to  
32  
33 485 immunization and curative health services, as well as universal electrification to reduce indoor  
34  
35 486 air pollution will be very useful strategies to reduce deaths due to LRIs in Ethiopia. Furthermore,  
36  
37 487 improvement in socioeconomic factors will also help to reduce LRI burden at national and  
38  
39 488 regional levels. To reach the targets set at the national and international level, mobilizing  
40  
41 489 resources to health and improving the provision of health services to the community according to  
42  
43 490 the needs of the regions is of paramount importance.  
44  
45  
46  
47  
48  
49

## 50 491 **List of abbreviations**

51  
52  
53 492 EPHI: Ethiopian Public Health Institute; GAPPD: Global Action Plan for the Prevention and  
54  
55 493 Control of Pneumonia and Diarrhoea GBD: Global Burden of Disease; GHO: Global Health  
56  
57  
58  
59  
60

1  
2  
3 494 Observatory; HSTP: Health Sector Transformation Plan; ICCM: integrated community case  
4  
5 495 management; IHME: Institute of Health and Metric Evaluation; LRIs: Lower Respiratory  
6  
7 496 Infections; NDMC: National Data Management Center for health; PCV: Pneumococcal  
8  
9 497 Conjugate Vaccine; SDG: Sustainable Development Goals; SNNPs: Southern Nations,  
10  
11 498 Nationalities and Peoples; UI: Uncertainty Interval; WHO: World Health Organization; YLL:  
12  
13 499 Years of Life Lost.  
14  
15  
16  
17

### 18 500 **Ethics approval and consent to participate**

19  
20 501 This manuscript was produced as part of the GBD Collaborator Network and in accordance with  
21  
22 502 the GBD Protocol.  
23  
24  
25

### 26 503 **Consent for publication**

27  
28 504 Not applicable.  
29  
30

### 31 505 **Availability of data and material**

32  
33 506 All relevant data are submitted with this manuscript.  
34  
35  
36

### 37 507 **Competing interests**

38  
39 508 The authors declare that they have no competing interests.  
40  
41

### 42 509 **Funding**

43  
44 510 Bill and Melinda Gates Foundation has funded Ethiopia subnational burden of disease EPHI-  
45  
46 511 IHME collaborative initiative. The funder of this study had no role in study design, data  
47  
48 512 collection, data analysis, data interpretation, or the writing of the report.  
49  
50

### 51 513 **Authors' contributions**

52  
53 514 Authors contribution  
54  
55  
56  
57  
58  
59  
60

- 1  
2  
3 515 Providing data or critical feedback on data sources  
4  
5  
6 516 Semagn Mekonnen Abate, Mesafint Molla Adane, Addis Aklilu, Dejene Tsegaye Alem,  
7  
8 517 Mulusew A Asemahagn, Hunegnaw Abebe, Melaku Ashagrie Belete, Tekleberhan Hailemariam,  
9  
10 518 Tezera Moshago Berheto, Belay Boda Abule Bodicha, Daniel Baza Gargamo, Alemayehu Hailu,  
11  
12 519 Awoke Misganaw, Mohsen Naghavi, Negussie Boti Sidamo, Yonatan Solomon, Shambel  
13  
14  
15 520 Wedajo, Melat Weldemariam, Amanuel Yigezu, Fentabil Getnet, and Yazachew Yismaw.  
16  
17 521 Developing methods or computational machinery  
18  
19 522 Semagn Mekonnen Abate, Tezera Moshago Berheto, Alemayehu Hailu, Mohsen Naghavi,  
20  
21 523 Negussie Boti Sidamo, and Amanuel Yigezu.  
22  
23  
24 524 Providing critical feedback on methods or results  
25  
26 525 Semagn Mekonnen Abate, Mesafint Molla Adane, Gizachew Taddesse Akalu, Addis Aklilu,  
27  
28 526 Dejene Tsegaye Alem, Zeleke Gebru, Mulusew Andualem Asemahagn, Daniel Atlaw,  
29  
30 527 Tewachew Awoke, Hunegnaw Abebe, Melaku Ashagrie Belete, Tekleberhan Hailemariam,  
31  
32 528 Tezera Moshago Berheto, Alemeshet Yirga, Setognal Birara Aychiluhm, Belay Boda Abule  
33  
34 529 Bodicha, Chuchu Churko, Feleke Mekonnen Demeke, Abebaw Alemayehu Desta, Lankamo  
35  
36 530 Ena, Tahir Eyayu, Zinabu Fentaw, Daniel Baza Gargamo, Mesfin Damtew Gebrehiwot,  
37  
38 531 Mathewos Alemu Gebremichael, Melaku Getachew, Ababi Zergaw, Alemayehu Hailu, Getahun  
39  
40 532 Molla, Awoke Misganaw, Mohsen Naghavi, Biniyam Sahiledengle, Bereket Beyene, Migbar  
41  
42 533 Sibhat, Negussie Boti Sidamo, Damtew Damtew Solomon, Yonatan Solomon, Birhanu Wagaye,  
43  
44 534 Shambel Wedajo, Melat Weldemariam, Amanuel Yigezu, Fentabil Getnet, and Yazachew  
45  
46 535 Yismaw.  
47  
48  
49  
50  
51 536 Drafting the work or revising is critically for important intellectual content  
52  
53  
54  
55  
56  
57  
58  
59  
60



1  
2  
3 537 Semagn Mekonnen Abate, Gizachew Tadesse Akalu, Mulusew A Asemahagn, Daniel Atlaw,  
4  
5 538 Niguss Cherie Bekele, Melaku Ashagrie Belete, Tezera Moshago Berheto, Setognal Birara  
6  
7 539 Aychiluhm, Belay Boda Abule Bodicha, Chuchu Churko, Tahir Eyayu, Zinabu Fentaw, Daniel  
8  
9 540 Baza Gargamo, Melaku Getachew, Ababi Zergaw, Firehiwot Abebe Gobena, Muluken Argaw  
10  
11 541 Haile, Alemayehu Hailu, Solomon Tessema Memirie, Awoke Misganaw, Mohsen Naghavi,  
12  
13 542 Biniyam Sahiledengle, Bereket Beyene, Negussie Boti Sidamo, Yonatan Solomon, Dereje  
14  
15 543 Mengistu Tolosa, Birhanu Wagaye, Ally Walker, Amanuel Yigezu, and Fentabil Getnet.  
16  
17  
18

19 544 Managing the estimation or publications process  
20

21 545 Semagn Mekonnen Abate, Awoke Misganaw, Mohsen Naghavi, Negussie Boti Sidamo, and  
22  
23 546 Amanuel Yigezu.  
24  
25

## 26 27 547 **Declarations**

28  
29 548 M A Gebremichael reports support for the present manuscript from the Bill and Melinda Gates  
30  
31 549 Foundation.  
32  
33

## 34 35 550 **Acknowledgements**

36  
37 551 The authors have no acknowledgements to declare  
38  
39

## 40 41 552 **References**

- 42  
43 553 1. Global, regional, and national age-sex specific mortality for 264 causes of death, 1980-  
44  
45 554 2016: a systematic analysis for the Global Burden of Disease Study 2016. Lancet (London,  
46  
47 555 England). 2017 Sep 16;390(10100):1151-210. PubMed PMID: 28919116. Pubmed Central  
48  
49 556 PMCID: PMC5605883. Epub 2017/09/19. eng.  
50  
51 557 2. Troeger C, Blacker B, Khalil IA, Rao PC, Cao J, Zimsen SRM, et al. Estimates of the  
52  
53 558 global, regional, and national morbidity, mortality, and aetiologies of lower respiratory infections  
54  
55  
56  
57

- 1  
2  
3 559 in 195 countries, 1990&#x2013;2016: a systematic analysis for the Global Burden of Disease  
4  
5 560 Study 2016. *The Lancet Infectious Diseases*. 2018;18(11):1191-210.  
6  
7  
8 561 3. Moradi-Lakeh M, El Bcheraoui C, Charara R, Khalil I, Afshin A, Kassebaum NJ, et al.  
9  
10 562 Burden of lower respiratory infections in the Eastern Mediterranean Region between 1990 and  
11  
12 563 2015: findings from the Global Burden of Disease 2015 study. *International Journal of Public*  
13  
14 564 *Health*. 2018 2018/05/01;63(1):97-108.  
15  
16  
17 565 4. Reiner RC, Welgan CA, Casey DC, Troeger CE, Baumann MM, Nguyen QP, et al.  
18  
19 566 Identifying residual hotspots and mapping lower respiratory infection morbidity and mortality in  
20  
21 567 African children from 2000 to 2017. *Nature Microbiology*. 2019 2019/12/01;4(12):2310-8.  
22  
23  
24 568 5. Miller NP, Amouzou A, Tafesse M, Hazel E, Legesse H, Degeffie T, et al. Integrated  
25  
26 569 community case management of childhood illness in Ethiopia: implementation strength and  
27  
28 570 quality of care. *Am J Trop Med Hyg*. 2014;91(2):424-34. PubMed PMID: 24799369. Epub  
29  
30 571 05/05. eng.  
31  
32  
33 572 6. Alamneh YM, Adane F. Magnitude and Predictors of Pneumonia among Under-Five  
34  
35 573 Children in Ethiopia: A Systematic Review and Meta-Analysis. *Journal of Environmental and*  
36  
37 574 *Public Health*. 2020 2020/05/30;2020:1606783.  
38  
39  
40 575 7. Wondimu A, Cao Q, Wilschut JC, Postma MJ. Factors associated with the uptake of  
41  
42 576 newly introduced childhood vaccinations in Ethiopia: the cases of rotavirus and pneumococcal  
43  
44 577 conjugate vaccines. *BMC Public Health*. 2019 2019/12/10;19(1):1656.  
45  
46  
47 578 8. Gonakoti S, Osifo IF. Protein-Energy Malnutrition Increases Mortality in Patients  
48  
49 579 Hospitalized With Bacterial Pneumonia: A Retrospective Nationwide Database Analysis.  
50  
51 580 *Cureus*. 2021 Jan 12;13(1):e12645. PubMed PMID: 33585131. Pubmed Central PMCID:  
52  
53 581 PMC7876587. Epub 2021/02/16. eng.  
54  
55  
56  
57  
58  
59  
60

- 1  
2  
3 582 9. Yeo HJ, Byun KS, Han J, Kim JH, Lee SE, Yoon SH, et al. Prognostic significance of  
4  
5 583 malnutrition for long-term mortality in community-acquired pneumonia: a propensity score  
6  
7 584 matched analysis. *The Korean journal of internal medicine*. 2019 Jul;34(4):841-9. PubMed  
8  
9 585 PMID: 30685962. Pubmed Central PMCID: PMC6610202. Epub 2019/01/29. eng.
- 10  
11  
12 586 10. Adane MM, Alene GD, Mereta ST, Wanyonyi KL. Prevalence and risk factors of acute  
13  
14 587 lower respiratory infection among children living in biomass fuel using households: a  
15  
16 588 community-based cross-sectional study in Northwest Ethiopia. *BMC Public Health*. 2020  
17  
18 589 2020/03/19;20(1):363.
- 19  
20  
21 590 11. Adane MM, Alene GD, Mereta ST, Wanyonyi KL. Effect of improved cookstove  
22  
23 591 intervention on childhood acute lower respiratory infection in Northwest Ethiopia: a cluster-  
24  
25 592 randomized controlled trial. *BMC Pediatrics*. 2021 2021/01/04;21(1):4.
- 26  
27  
28 593 12. Keleb A, Sisay T, Alemu K, Ademas A, Lingerew M, Kloos H, et al. Pneumonia remains  
29  
30 594 a leading public health problem among under-five children in peri-urban areas of north-eastern  
31  
32 595 Ethiopia. *PLOS ONE*. 2020;15(9):e0235818.
- 33  
34  
35 596 13. Ahmed KY, Page A, Arora A, Ogbo FA, Global M, Child Health Research c.  
36  
37 597 Associations between infant and young child feeding practices and acute respiratory infection  
38  
39 598 and diarrhoea in Ethiopia: A propensity score matching approach. *PLOS ONE*.  
40  
41 599 2020;15(4):e0230978.
- 42  
43  
44 600 14. Assefa Y, Gelaw YA, Hill PS, Taye BW, Van Damme W. Community health extension  
45  
46 601 program of Ethiopia, 2003–2018: successes and challenges toward universal coverage for  
47  
48 602 primary healthcare services. *Globalization and Health*. 2019 2019/03/26;15(1):24.
- 49  
50  
51 603 15. Ruducha J, Mann C, Singh NS, Gemebo TD, Tessema NS, Baschieri A, et al. How  
52  
53 604 Ethiopia achieved Millennium Development Goal 4 through multisectoral interventions: a

- 1  
2  
3 605 Countdown to 2015 case study. *Lancet Glob Health*. 2017;5(11):e1142-e51. PubMed PMID:  
4  
5 606 29025635. eng.
- 6  
7  
8 607 16. Federal Ministry of Health. Health Sector Transformation Plan 2020/21-2024/25 (2013  
9  
10 608 EFY - 2017 EFY), Addis Ababa Ethiopia. 2020.
- 11  
12 609 17. Unicef, World Health O. Ending preventable child deaths from pneumonia and diarrhoea  
13  
14 610 by 2025 : the integrated global action plan for pneumonia and diarrhoea (GAPPD) 2013.  
15  
16 611 Available from: <https://apps.who.int/iris/handle/10665/79200>.
- 17  
18  
19 612 18. World Bank. World Bank data catalog. [Washington, D.C.]: World Bank.
- 20  
21 613 19. central statistical agency. Ethiopian statistical service. 2020. Available from:  
22  
23 614 <http://www.statsethiopia.gov.et/>.
- 24  
25  
26 615 20. Burden of Disease Unit (BoD) NDMCNfh, Ethiopia Public Health Institute. Ethiopia  
27  
28 616 Health Atlas, 2021 2021. Available from: <https://ndmc.ephi.gov.et/national-health-atlas/>.
- 29  
30  
31 617 21. Misganaw ANMWAMAHAHZBTMWEAKJHEGTWTKDDA. Progress in health  
32  
33 618 among regions of Ethiopia, 1990-2019: a subnational country analysis for the Global Burden of  
34  
35 619 Disease Study 2019. *Lancet Lancet (London, England)*. 2022;399(10332):1322-35.
- 36  
37  
38 620 22. Murray CJL, Aravkin AY, Zheng P, Abbafati C, Abbas KM, Abbasi-Kangevari M, et al.  
39  
40 621 Global burden of 87 risk factors in 204 countries and territories, 1990&#x2013;2019: a  
41  
42 622 systematic analysis for the Global Burden of Disease Study 2019. *The Lancet*.  
43  
44 623 2020;396(10258):1223-49.
- 45  
46  
47 624 23. Collaborators GL. Estimates of the global, regional, and national morbidity, mortality,  
48  
49 625 and aetiologies of lower respiratory tract infections in 195 countries: a systematic analysis for the  
50  
51 626 Global Burden of Disease Study 2015. *Lancet Infect Dis*. 2017;17(11):1133-61. PubMed PMID:  
52  
53 627 28843578. Epub 08/23. eng.
- 54  
55  
56  
57  
58  
59  
60

- 1  
2  
3 628 24. DALYs GBD, Collaborators H. Global, regional, and national disability-adjusted life-  
4  
5 629 years (DALYs) for 315 diseases and injuries and healthy life expectancy (HALE), 1990-2015: a  
6  
7 630 systematic analysis for the Global Burden of Disease Study 2015. *Lancet* (London, England).  
8  
9 631 2016;388(10053):1603-58. PubMed PMID: 27733283. eng.
- 10  
11  
12 632 25. Dicker D, Nguyen G, Abate D, Abate KH, Abay SM, Abbafati C, et al. Global, regional,  
13  
14 633 and national age-sex-specific mortality and life expectancy, 1950-2017: a systematic  
15  
16 634 analysis for the Global Burden of Disease Study 2017. *The Lancet*. 2018;392(10159):1684-735.
- 17  
18  
19 635 26. Lim SS, Vos T, Flaxman AD, Danaei G, Shibuya K, Adair-Rohani H, et al. A  
20  
21 636 comparative risk assessment of burden of disease and injury attributable to 67 risk factors and  
22  
23 637 risk factor clusters in 21 regions, 1990-2010: a systematic analysis for the Global Burden of  
24  
25 638 Disease Study 2010. *Lancet* (London, England). 2012;380(9859):2224-60. PubMed PMID:  
26  
27 639 23245609. eng.
- 28  
29  
30  
31 640 27. Collaborators GBDRF, Forouzanfar MH, Alexander L, Anderson HR, Bachman VF,  
32  
33 641 Biryukov S, et al. Global, regional, and national comparative risk assessment of 79 behavioural,  
34  
35 642 environmental and occupational, and metabolic risks or clusters of risks in 188 countries, 1990-  
36  
37 643 2013: a systematic analysis for the Global Burden of Disease Study 2013. *Lancet* (London,  
38  
39 644 England). 2015;386(10010):2287-323. PubMed PMID: 26364544. Epub 09/11. eng.
- 40  
41  
42 645 28. Misganaw A, Naghavi M, Walker A, Mirkuzie AH, Giref AZ, Berheto TM, et al.  
43  
44 646 Progress in health among regions of Ethiopia, 1990-2019: a subnational country  
45  
46 647 analysis for the Global Burden of Disease Study 2019. *The Lancet*. 2022;399(10332):1322-35.
- 47  
48  
49 648 29. Shibre G, Zegeye B, Idriss-Wheeler D, Yaya S. Trends of inequalities in care seeking  
50  
51 649 behavior for under-five children with suspected pneumonia in Ethiopia: evidence from Ethiopia  
52  
53 650 demographic and health surveys (2005-2016). *BMC Public Health*. 2021 2021/02/01;21(1):258.

- 1  
2  
3 651 30. Fighting for Breath in Ethiopia: a call to action to stop children dying from pneumonia  
4  
5 652 [Internet]. 2020. Available from: [stopppneumonia.org/wp-content/uploads/2019/11/Ethiopia-](http://stopppneumonia.org/wp-content/uploads/2019/11/Ethiopia-)  
6  
7 653 2019-Web\_updated.pdf.  
8  
9  
10 654 31. Kovacs SD, Mullholland K, Bosch J, Campbell H, Forouzanfar MH, Khalil I, et al.  
11  
12 655 Deconstructing the differences: a comparison of GBD 2010 and CHERG's approach to  
13  
14 656 estimating the mortality burden of diarrhea, pneumonia, and their etiologies. *BMC Infectious*  
15  
16 657 *Diseases*. 2015 2015/01/16;15(1):16.  
17  
18  
19 658 32. Federal Ministry of Health Ethiopia. Evidence Synthesis based on DHS key maternal and  
20  
21 659 child health and nutrition indicators. 2019.  
22  
23  
24 660 33. Federal Democratic Republic of Ethiopia-Ministry of Health. Mini Demographic and  
25  
26 661 Health Survey 2019. 2019.  
27  
28  
29 662 34. Corrêa RA, José BPS, Malta DC, Passos VMA, França EB, Teixeira RA, et al. Burden of  
30  
31 663 disease by lower respiratory tract infections in Brazil, 1990 to 2015: estimates of the Global  
32  
33 664 Burden of Disease 2015 study. *Revista brasileira de epidemiologia = Brazilian journal of*  
34  
35 665 *epidemiology*. 2017 May;20Suppl 01(Suppl 01):171-81. PubMed PMID: 28658381. Epub  
36  
37 666 2017/06/29. Carga de doença por infecções do trato respiratório inferior no Brasil, 1990 a 2015:  
38  
39 667 estimativas do estudo Global Burden of Disease 2015. por  
40  
41  
42 668 eng.  
43  
44  
45 669 35. Salam RA, Das JK, Bhutta ZA. Current issues and priorities in childhood nutrition,  
46  
47 670 growth, and infections. *The Journal of nutrition*. 2015 May;145(5):1116S-22S. PubMed PMID:  
48  
49 671 25833888. Pubmed Central PMCID: PMC4410495. Epub 2015/04/03. eng.  
50  
51  
52 672 36. Akombi BJ, Agho KE, Hall JJ, Wali N, Renzaho AMN, Merom D. Stunting, Wasting and  
53  
54 673 Underweight in Sub-Saharan Africa: A Systematic Review. *International journal of*  
55  
56  
57  
58  
59  
60

- 1  
2  
3 674 environmental research and public health. 2017 Aug 1;14(8). PubMed PMID: 28788108.  
4  
5 675 Pubmed Central PMCID: PMC5580567. Epub 2017/08/10. eng.  
6  
7  
8 676 37. Ibrahim MK, Zambruni M, Melby CL, Melby PC. Impact of Childhood Malnutrition on  
9  
10 677 Host Defense and Infection. Clinical microbiology reviews. 2017 Oct;30(4):919-71. PubMed  
11  
12 678 PMID: 28768707. Pubmed Central PMCID: PMC5608884. Epub 2017/08/05. eng.  
13  
14  
15 679 38. Fantay Gebru K, Mekonnen Haileselassie W, Haftom Temesgen A, Oumer Seid A,  
16  
17 680 Afework Mulugeta B. Determinants of stunting among under-five children in Ethiopia: a  
18  
19 681 multilevel mixed-effects analysis of 2016 Ethiopian demographic and health survey data. BMC  
20  
21 682 Pediatrics. 2019 2019/06/01;19(1):176.  
22  
23  
24 683 39. Dherani M, Pope D, Mascarenhas M, Smith KR, Weber M, Bruce N. Indoor air pollution  
25  
26 684 from unprocessed solid fuel use and pneumonia risk in children aged under five years: a  
27  
28 685 systematic review and meta-analysis. Bulletin of the World Health Organization. 2008  
29  
30 686 May;86(5):390-8C. PubMed PMID: 18545742. Pubmed Central PMCID: PMC2647443. Epub  
31  
32 687 2008/06/12. eng.  
33  
34  
35 688 40. Kurmi OP, Lam KB, Ayres JG. Indoor air pollution and the lung in low- and medium-  
36  
37 689 income countries. The European respiratory journal. 2012 Jul;40(1):239-54. PubMed PMID:  
38  
39 690 22362845. Epub 2012/03/01. eng.  
40  
41  
42 691 41. Burnett RT, Pope CA, 3rd, Ezzati M, Olives C, Lim SS, Mehta S, et al. An integrated risk  
43  
44 692 function for estimating the global burden of disease attributable to ambient fine particulate  
45  
46 693 matter exposure. Environmental health perspectives. 2014 Apr;122(4):397-403. PubMed PMID:  
47  
48 694 24518036. Epub 2014/02/13. eng.  
49  
50  
51 695 42. Federal Ministry of Health Addis Ababa E. Health Sector Transformation Plan 2015/16 -  
52  
53 696 2019/20 (2008-2012 EFY). . August 2015. .

1  
2  
3 697 43. Stenberg K, Hanssen O, Edejer TT-T, Bertram M, Brindley C, Meshreky A, et al.  
4  
5 698 Financing transformative health systems towards achievement of the health Sustainable  
6  
7 699 Development Goals: a model for projected resource needs in 67 low-income and middle-income  
8  
9 700 countries. *The Lancet Global Health*. 2017;5(9):e875-e877.

10  
11 701 44. Vos T, Lim SS, Abbafati C, Abbas KM, Abbasi M, Abbasifard M, et al. Global burden of  
12  
13 702 369 diseases and injuries in 204 countries and territories, 1990&#x2013;2019: a systematic  
14  
15 703 analysis for the Global Burden of Disease Study 2019. *The Lancet*. 2020;396(10258):1204-22.  
16  
17  
18  
19

20 704

21  
22  
23 705

24  
25 706  
26  
27  
28  
29  
30  
31  
32  
33  
34  
35  
36  
37  
38  
39  
40  
41  
42  
43  
44  
45  
46  
47  
48  
49  
50  
51  
52  
53  
54  
55  
56  
57  
58  
59  
60



1  
2  
3 707 *Figure 1: Socio-demographic index, Ethiopia, 2019*  
4

5 708 *Figure 2: Incidence of lower respiratory infections per 100,000 people in Ethiopia and its*  
6  
7  
8 709 *regions in 2019.*  
9

10 710 *Figure 3: Trend in LRIs age standardized years of life lost rates per 100,000 people in Ethiopia,*  
11 711 *1990-2019*  
12

13  
14 712  
15  
16  
17  
18  
19  
20  
21  
22  
23  
24  
25  
26  
27  
28  
29  
30  
31  
32  
33  
34  
35  
36  
37  
38  
39  
40  
41  
42  
43  
44  
45  
46  
47  
48  
49  
50  
51  
52  
53  
54  
55  
56  
57  
58  
59  
60

For peer review only

Figure 1: Socio-demographic index, Ethiopia, 2019

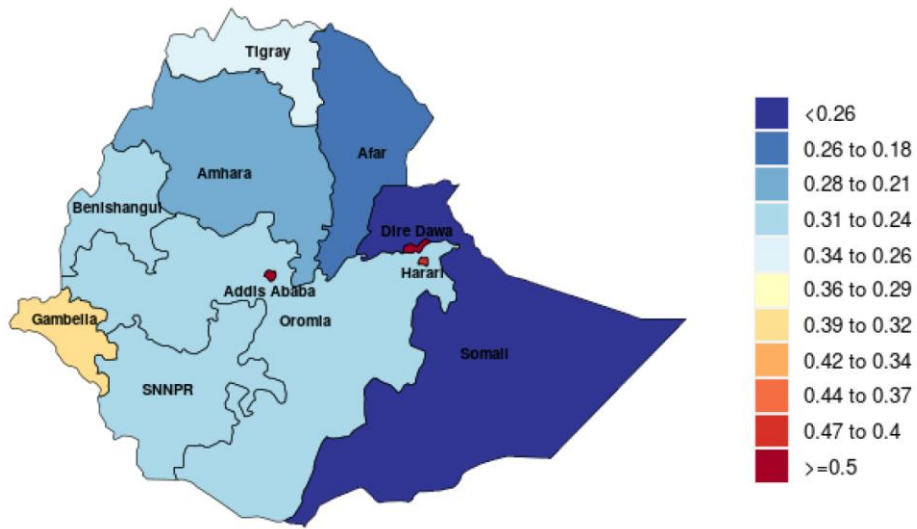

Peer review only

Figure 2: Incidence of lower respiratory infections per 100,000 people in Ethiopia and its regions in 2019.

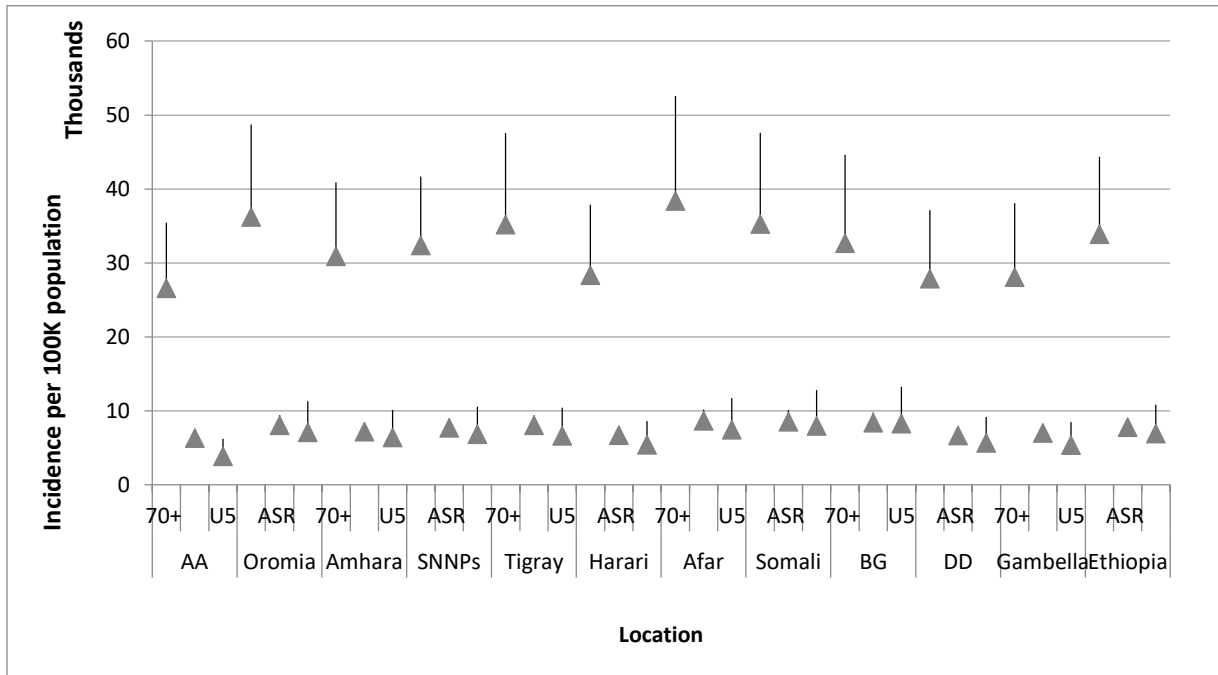

Key: U5: children younger than 5 years; 70+: adults older than 70 years; ASR: Age-standardized rates; AA: Addis Ababa; DD: Dire Dawa; SNNPs: Southern Nations and Nationalities and Peoples; BG: Benishangul Gumuz

Figure 3: Trend in LRIs age standardized years of life lost rates per 100,000 people in Ethiopia, 1990-2019

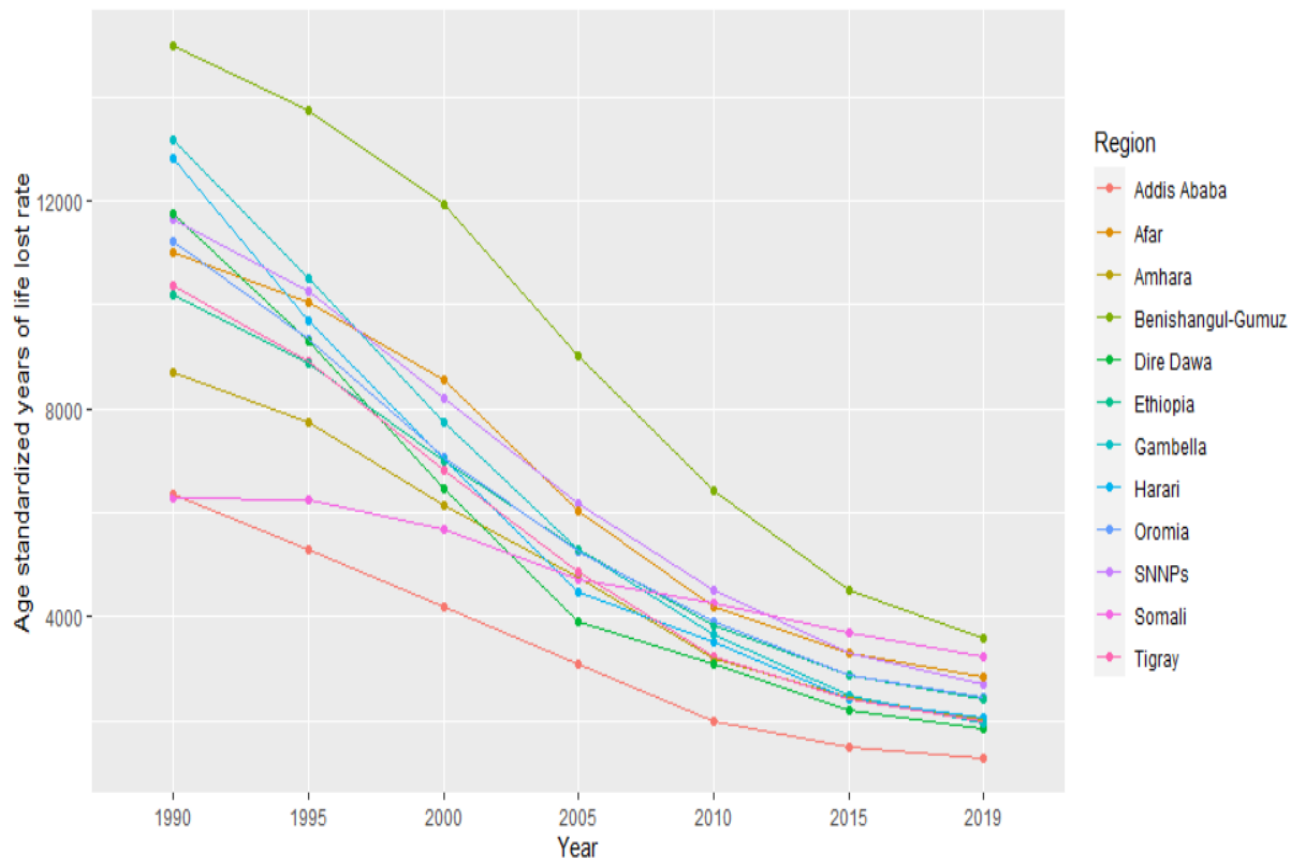

view only

1  
2  
3 **1 Supplementary material to “The burden of lower respiratory infections and associated risk**  
4 **factors across regions in Ethiopia: A subnational analysis of the Global Burden of Diseases**  
5 **2019 Study”**  
6  
7

8 This supplementary material provides supplemental figures and tables more detailed results for  
9 ““The burden of lower respiratory infections and associated risk factors across regions in  
10 Ethiopia: A subnational analysis of the Global Burden of Diseases 2019 Study”  
11  
12  
13  
14

15 **8 Contents**

16 **9 Lists of Tables and Figures** ..... 2  
17  
18 Supplemental Figure 1: Trend in age-standardized incidence rate of LRIs per 100,000 people in  
19 Ethiopia, 1990-2019 ..... 2  
20  
21 Supplemental Figure 2: Children under 5 years of age incidence rate per 100,000 populations due to  
22 LRI in Ethiopia, 1990- 2019 ..... 3  
23  
24 Supplemental Figure 3: Trend in LRIs age-standardized mortality rates per 100,000 people in Ethiopia,  
25 1990-2019 ..... 4  
26  
27 Supplemental Figure 4: Children younger than 5 years mortality rate per 100,000 populations for lower  
28 respiratory infections in Ethiopia, 1990-2019 ..... 4  
29  
30 Supplemental Figure 5: Adults older than 70 years mortality rate per 100,000 populations for lower  
31 respiratory infections in Ethiopia, 1990-2019 ..... 4  
32  
33 Supplemental Figure 6: Children younger than 5 years YLL per 100,000 populations for lower  
34 respiratory infections in Ethiopia, 1990-2019 ..... 5  
35  
36 Supplemental Figure 8: Attribution of the risk factors to LRIs death rate per 100,000 population in all  
37 age groups between 1990 and 2019 for Ethiopia and its regions, both sexes, number of death, 2019.  
38 SNNPs: Southern Nations, Nationalities, and Peoples. .... 6  
39  
40 Supplemental Figure 10: Trends in the risk factors between 1990 and 2019 for all ages for Ethiopia ... 8  
41  
42 **26 Tables**..... 9  
43  
44 Supplemental Table 1: Number and percentage changes of episode attributable to LRIs in 1990 and  
45 2019 for Ethiopia, its regions, both sexes ..... 9  
46  
47 Supplemental Table 2: Rate and percentage changes of episodes attributable to LRIs in 1990 and 2019  
48 for Ethiopia and its regions, both sexes ..... 10  
49  
50 Supplemental Table 3: Number and percentage changes of death attributable to LRIs in 1990 and 2019  
51 for Ethiopia and its regions, both sexes. .... 11  
52  
53 Supplemental Table 4: Age standardized mortality rate, Ethiopia and its regions, by sex, 2019 ..... 12  
54  
55 Supplemental Table 5: Number and percentage changes of YLL attributable to LRIs in 1990 and 2019  
56 for Ethiopia and its regions, both sexes ..... 12  
57  
58 Supplemental Table 6: Rate and percentage changes of YLL attributable to LRIs in 1990 and 2019 for  
59 Ethiopia and its regions, both sexes. .... 13  
60

38 Authors contributions ..... 15

39

40

41 **Lists of Tables and Figures**

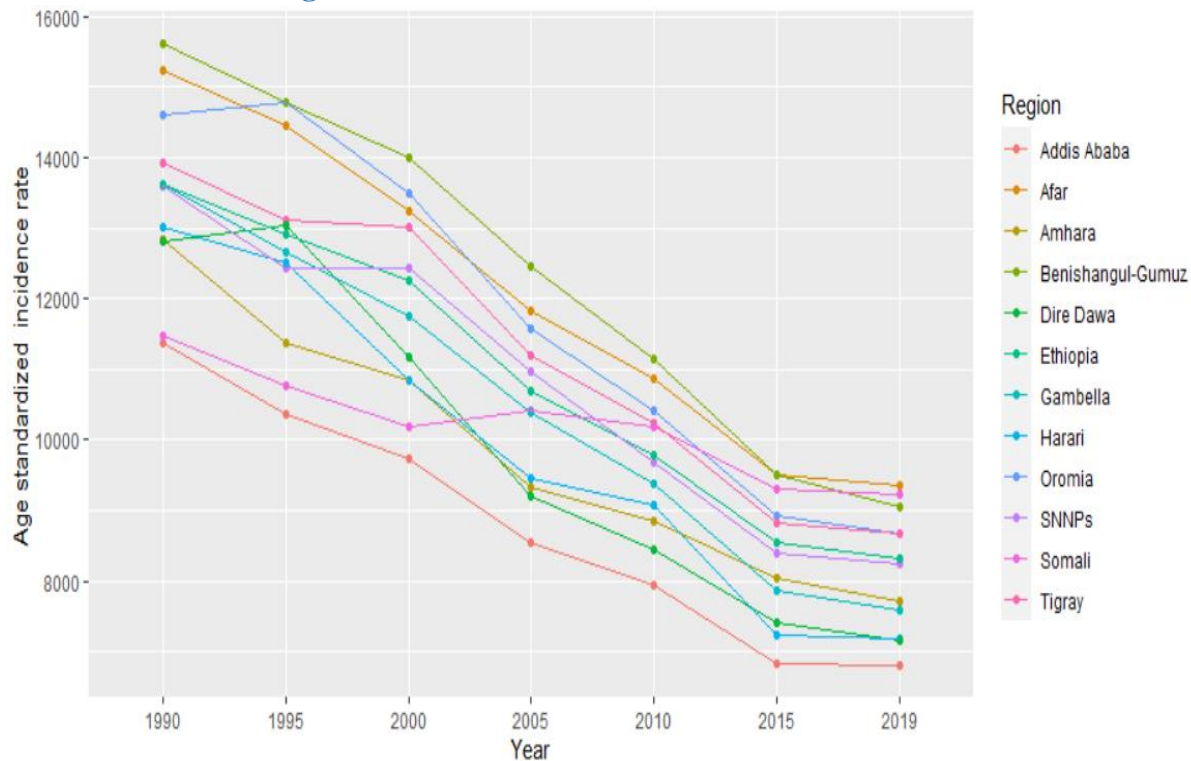

42

43 Supplemental Figure 1: Trend in age-standardized incidence rate of LRIs per 100,000 people in  
44 Ethiopia, 1990-2019

45

1  
2  
3  
4  
5  
6  
7  
8  
9  
10  
11  
12  
13  
14  
15  
16  
17  
18  
19  
20  
21  
22  
23  
24  
25  
26  
27  
28  
29  
30  
31  
32  
33  
34  
35  
36  
37  
38  
39  
40  
41  
42  
43  
44  
45  
46  
47  
48  
49  
50  
51  
52  
53  
54  
55  
56  
57  
58  
59  
60

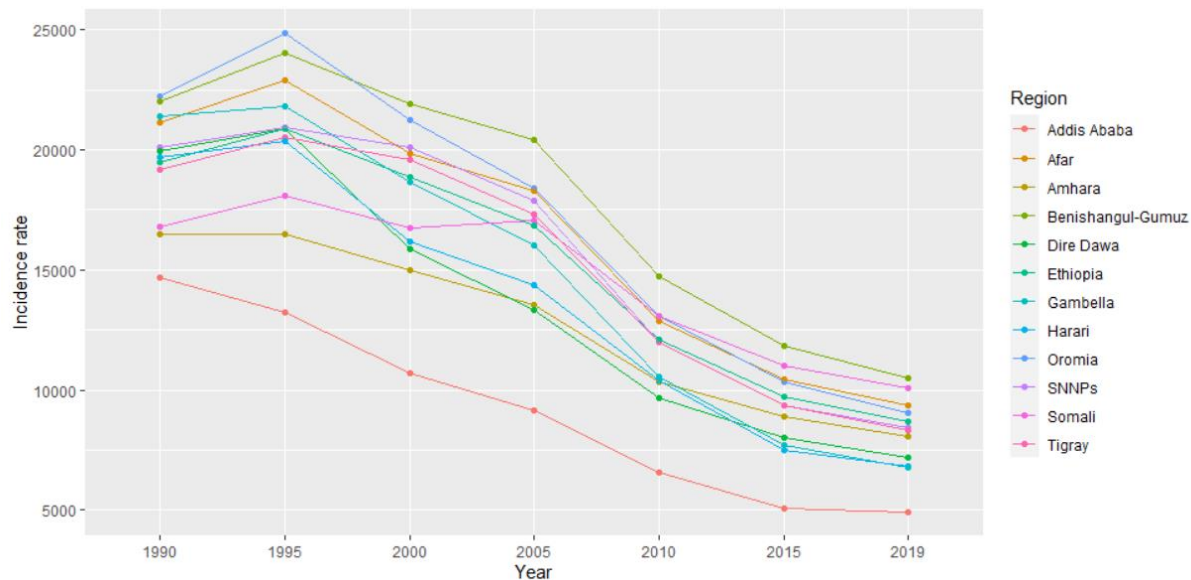

46  
47 Supplemental Figure 2: Children under 5 years of age incidence rate per 100,000 populations due  
48 to LRI in Ethiopia, 1990- 2019

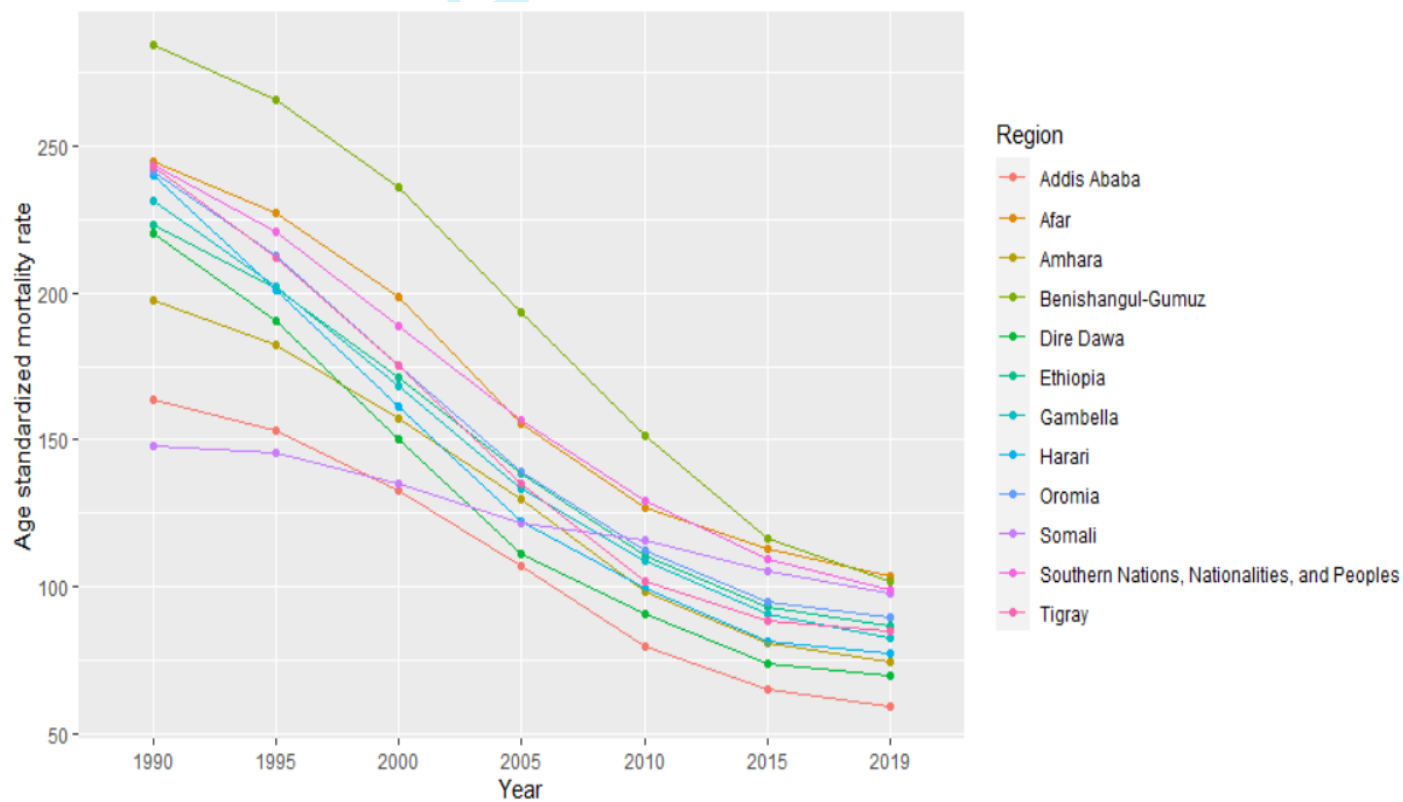

49

50

51 Supplemental Figure 3: Trend in LRIs age-standardized mortality rates per 100,000 people in  
 52 Ethiopia, 1990-2019

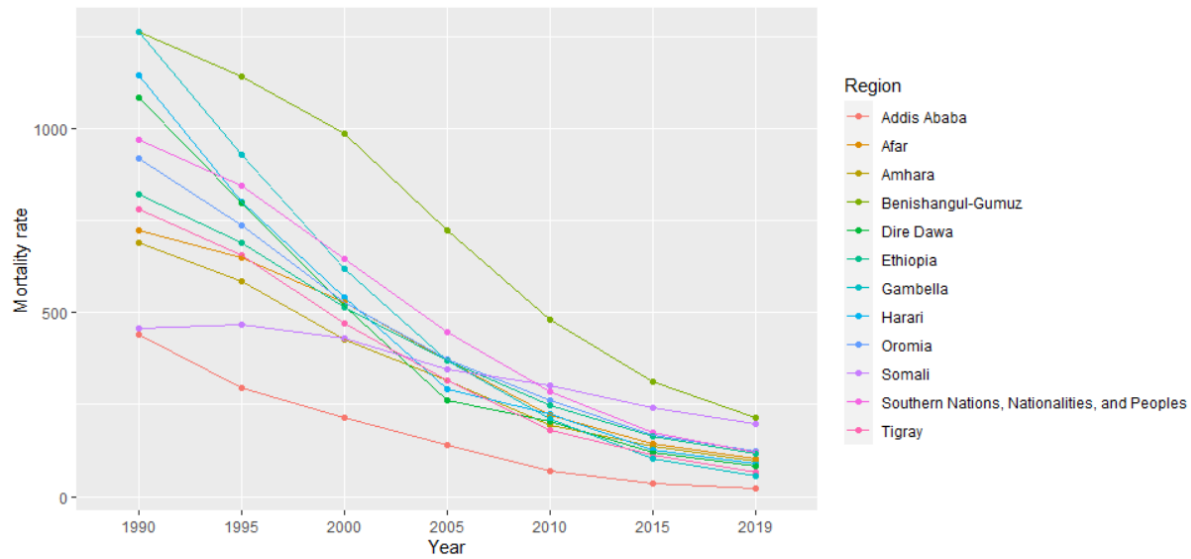

53  
 54 Supplemental Figure 4: Children younger than 5 years mortality rate per 100,000 populations for  
 55 lower respiratory infections in Ethiopia, 1990-2019

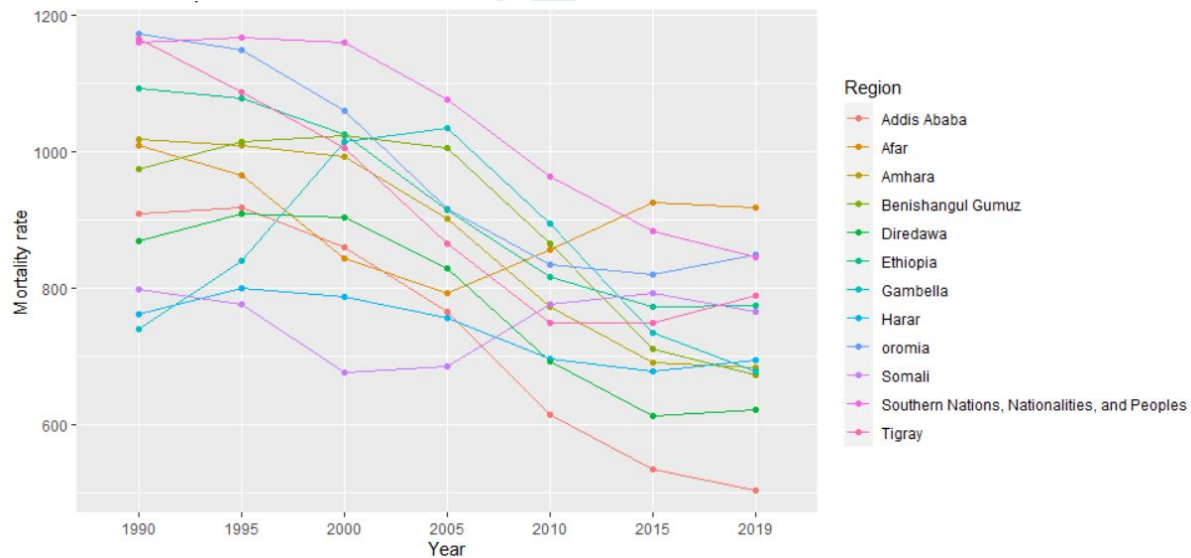

56  
 57 Supplemental Figure 5: Adults older than 70 years mortality rate per 100,000 populations for  
 58 lower respiratory infections in Ethiopia, 1990-2019  
 59



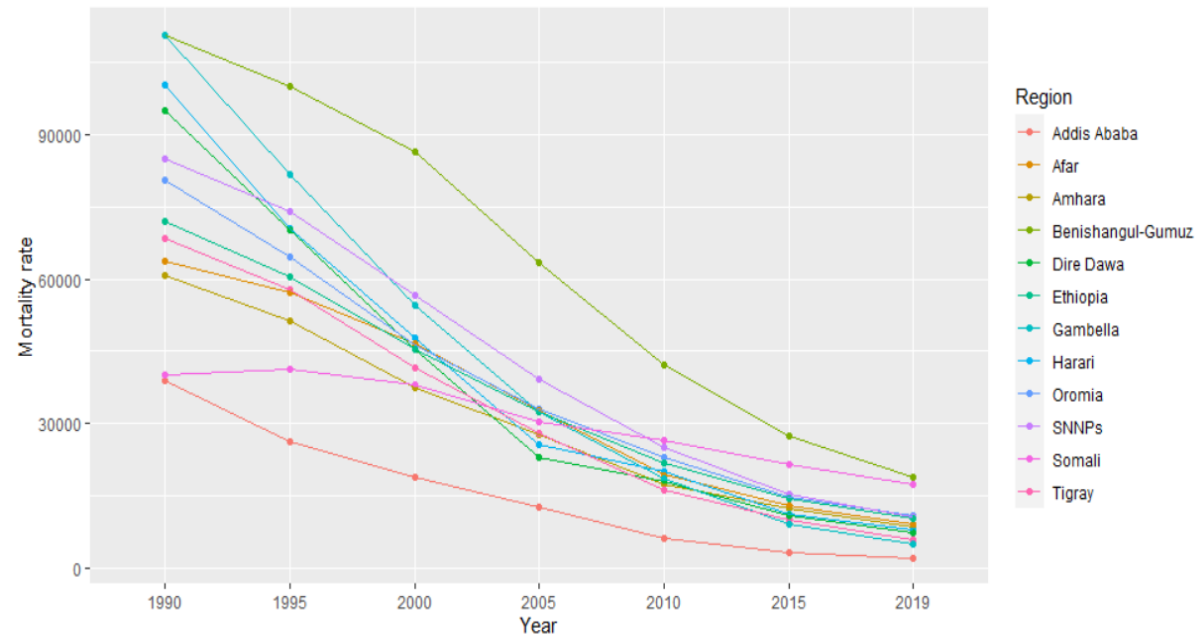

Supplemental Figure 6: Children younger than 5 years YLL per 100,000 populations for lower respiratory infections in Ethiopia, 1990-2019

1  
2  
3  
4  
5  
6  
7  
8  
9  
10  
11  
12  
13  
14  
15  
16  
17  
18  
19  
20  
21  
22  
23  
24  
25  
26  
27  
28  
29  
30  
31  
32  
33  
34  
35  
36  
37  
38  
39  
40  
41  
42  
43  
44  
45  
46  
47  
48  
49  
50  
51  
52  
53  
54  
55  
56  
57  
58  
59  
60

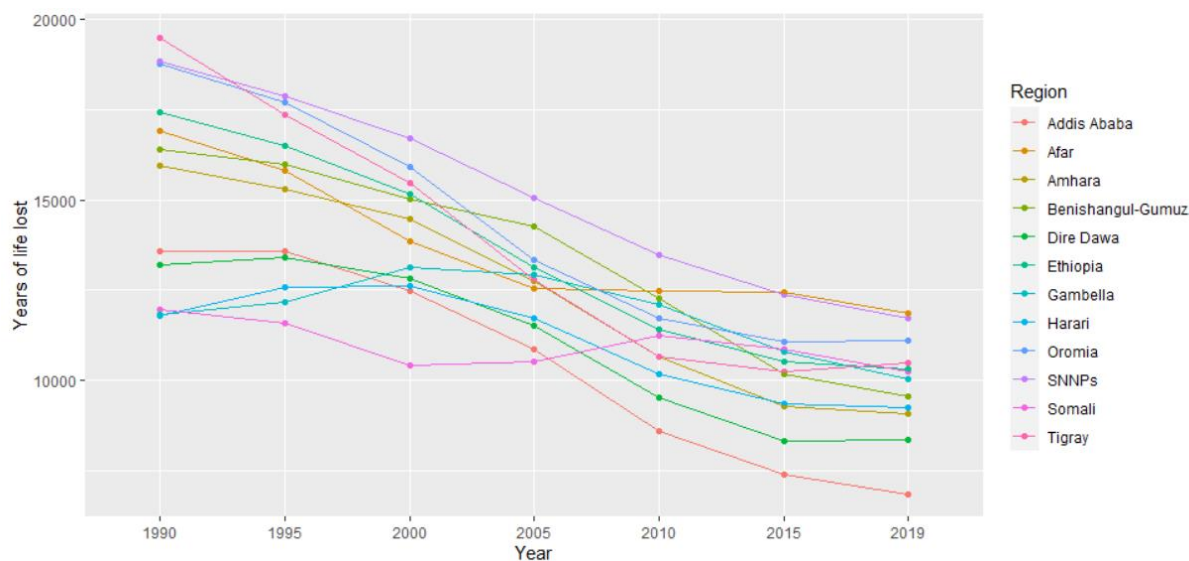

72  
73 Supplemental Figure 7: Adults older than 70 years YLL per 100,000 populations for lower  
74 respiratory infections in Ethiopia, 1990-2019

| Location          | Alcohol use | Ambient particulate matter pollution | Child stunting | Child underweight | child wasting | High temperature | Household air pollution from solid fuel | Low birth weight | Low temperature | No access to handwashing facility | Non-exclusive breastfeeding | Secondhand smoke | Short gestation | Smoking |
|-------------------|-------------|--------------------------------------|----------------|-------------------|---------------|------------------|-----------------------------------------|------------------|-----------------|-----------------------------------|-----------------------------|------------------|-----------------|---------|
| Addis Ababa       | 1.4         | 4                                    | 0.1            | 0.1               | 0.7           | 0                | 1.7                                     | 0.7              | 3.7             | 4.8                               | 0.1                         | 0.4              | 0.7             | 1       |
| Oromia            | 0.6         | 2.5                                  | 2.5            | 1.9               | 11.2          | 0.9              | 21.6                                    | 4.3              | 2.2             | 10.3                              | 0.9                         | 0.6              | 3.5             | 1.3     |
| Amhara            | 0.4         | 2.5                                  | 1.8            | 1.4               | 6.7           | 0.9              | 19.8                                    | 3.3              | 2.4             | 9.5                               | 0.4                         | 0.6              | 2.6             | 0.4     |
| SNNPs             | 0.8         | 2.4                                  | 2.7            | 2.2               | 10.2          | 1.8              | 19.9                                    | 3.5              | 1.4             | 9.6                               | 0.8                         | 0.5              | 2.9             | 0.9     |
| Tigray            | 0.7         | 3.3                                  | 0.8            | 0.8               | 4             | 1.1              | 17.7                                    | 2.8              | 1.2             | 9.4                               | 0.3                         | 0.5              | 2.4             | 0.4     |
| Harari            | 1           | 3.8                                  | 0.9            | 0.7               | 5.3           | 0                | 9.6                                     | 2.4              | 1.1             | 7.6                               | 0.6                         | 0.6              | 2.1             | 3.2     |
| Afar              | 0.4         | 2.1                                  | 1.8            | 1.9               | 8.5           | 6.3              | 21                                      | 4.5              | 0.1             | 9.4                               | 0.9                         | 0.6              | 3.6             | 1.4     |
| Somali            | 0.3         | 1.6                                  | 3.3            | 3.8               | 22.2          | 4.8              | 31.6                                    | 7.2              | 0.4             | 13.3                              | 2.5                         | 0.9              | 5.7             | 1.8     |
| Benishangul-Gumuz | 0.4         | 3.4                                  | 4.5            | 3.5               | 20            | 4.7              | 27.7                                    | 4.9              | 0.6             | 13.3                              | 1.3                         | 0.7              | 4               | 0.8     |
| Dire Dawa         | 0.9         | 3.6                                  | 0.7            | 0.7               | 5.1           | 0.4              | 8.3                                     | 2.4              | 0.5             | 6.9                               | 0.4                         | 0.5              | 2               | 2.1     |
| Gambella          | 0.8         | 2.2                                  | 0.4            | 0.4               | 3.2           | 2.5              | 9.3                                     | 2.2              | 0.1             | 5.4                               | 0.4                         | 0.3              | 1.9             | 2.1     |
| Ethiopia          | 0.6         | 2.5                                  | 2.2            | 1.8               | 9.9           | 1.4              | 20.5                                    | 3.9              | 1.9             | 9.9                               | 0.8                         | 0.6              | 3.2             | 1       |

75  
76 Supplemental Figure 8: Attribution of the risk factors to LRIs death rate per 100,000 population  
77 in all age groups between 1990 and 2019 for Ethiopia and its regions, both sexes, number of  
78 death, 2019. SNNPs: Southern Nations, Nationalities, and Peoples.  
79

|                   | Ambient particulate matter pollution | child stunting | Child under weight | child wasting | high temperature | Household air pollution from solid fuels/ birth weight | Low temperature | No access to handwashing facility | Non-exclusive breastfeeding | Secondhand smoke | Short gestation |       |
|-------------------|--------------------------------------|----------------|--------------------|---------------|------------------|--------------------------------------------------------|-----------------|-----------------------------------|-----------------------------|------------------|-----------------|-------|
| Addis Ababa       | 3.63                                 | 0.82           | 0.64               | 8.35          | 0.00             | 1.75                                                   | 8.86            | 3.29                              | 4.27                        | 1.32             | 0.31            | 7.98  |
| Oromia            | 6.41                                 | 14.75          | 11.45              | 67.14         | 2.34             | 60.08                                                  | 25.95           | 6.05                              | 28.32                       | 5.25             | 1.66            | 21.03 |
| Amhara            | 5.40                                 | 13.01          | 9.84               | 48.10         | 2.02             | 46.86                                                  | 23.47           | 5.46                              | 21.99                       | 2.81             | 1.36            | 18.88 |
| SNNPs             | 6.36                                 | 16.67          | 13.77              | 63.88         | 5.03             | 57.68                                                  | 21.95           | 4.12                              | 27.49                       | 5.28             | 1.38            | 18.31 |
| Tigray            | 5.03                                 | 6.15           | 5.75               | 29.88         | 1.87             | 29.89                                                  | 20.59           | 2.00                              | 15.32                       | 1.91             | 0.79            | 17.45 |
| Harari            | 9.12                                 | 7.21           | 5.80               | 43.66         | 0.01             | 25.51                                                  | 19.63           | 2.74                              | 19.30                       | 5.00             | 1.62            | 17.18 |
| Afar              | 4.88                                 | 11.42          | 11.57              | 52.76         | 15.77            | 53.12                                                  | 28.03           | 0.26                              | 23.50                       | 5.49             | 1.33            | 22.31 |
| Somali            | 5.40                                 | 18.08          | 20.92              | 121.83        | 16.76            | 110.21                                                 | 39.76           | 1.46                              | 46.07                       | 13.99            | 3.18            | 31.30 |
| Benishangul-Gumuz | 12.63                                | 28.22          | 22.25              | 125.72        | 17.81            | 105.51                                                 | 30.75           | 2.22                              | 50.23                       | 8.05             | 2.61            | 24.89 |
| Dire Dawa         | 9.38                                 | 5.50           | 5.64               | 42.47         | 1.11             | 23.88                                                  | 19.72           | 1.42                              | 18.88                       | 3.67             | 1.50            | 16.71 |
| Gambella          | 4.75                                 | 3.13           | 3.08               | 25.92         | 6.16             | 23.51                                                  | 18.20           | 0.18                              | 13.02                       | 2.86             | 0.60            | 15.31 |
| Ethiopia          | 6.06                                 | 14.39          | 11.93              | 64.00         | 4.28             | 58.22                                                  | 25.08           | 4.73                              | 27.20                       | 5.22             | 1.58            | 20.40 |

Supplemental Figure 9: Attribution of the risk factors to LRIs death rate per 100,000 population in children younger than 5 years between 1990 and 2019 for Ethiopia and its regions, both sexes, number of death, 2019. SNNPs: Southern Nations, Nationalities, and Peoples.

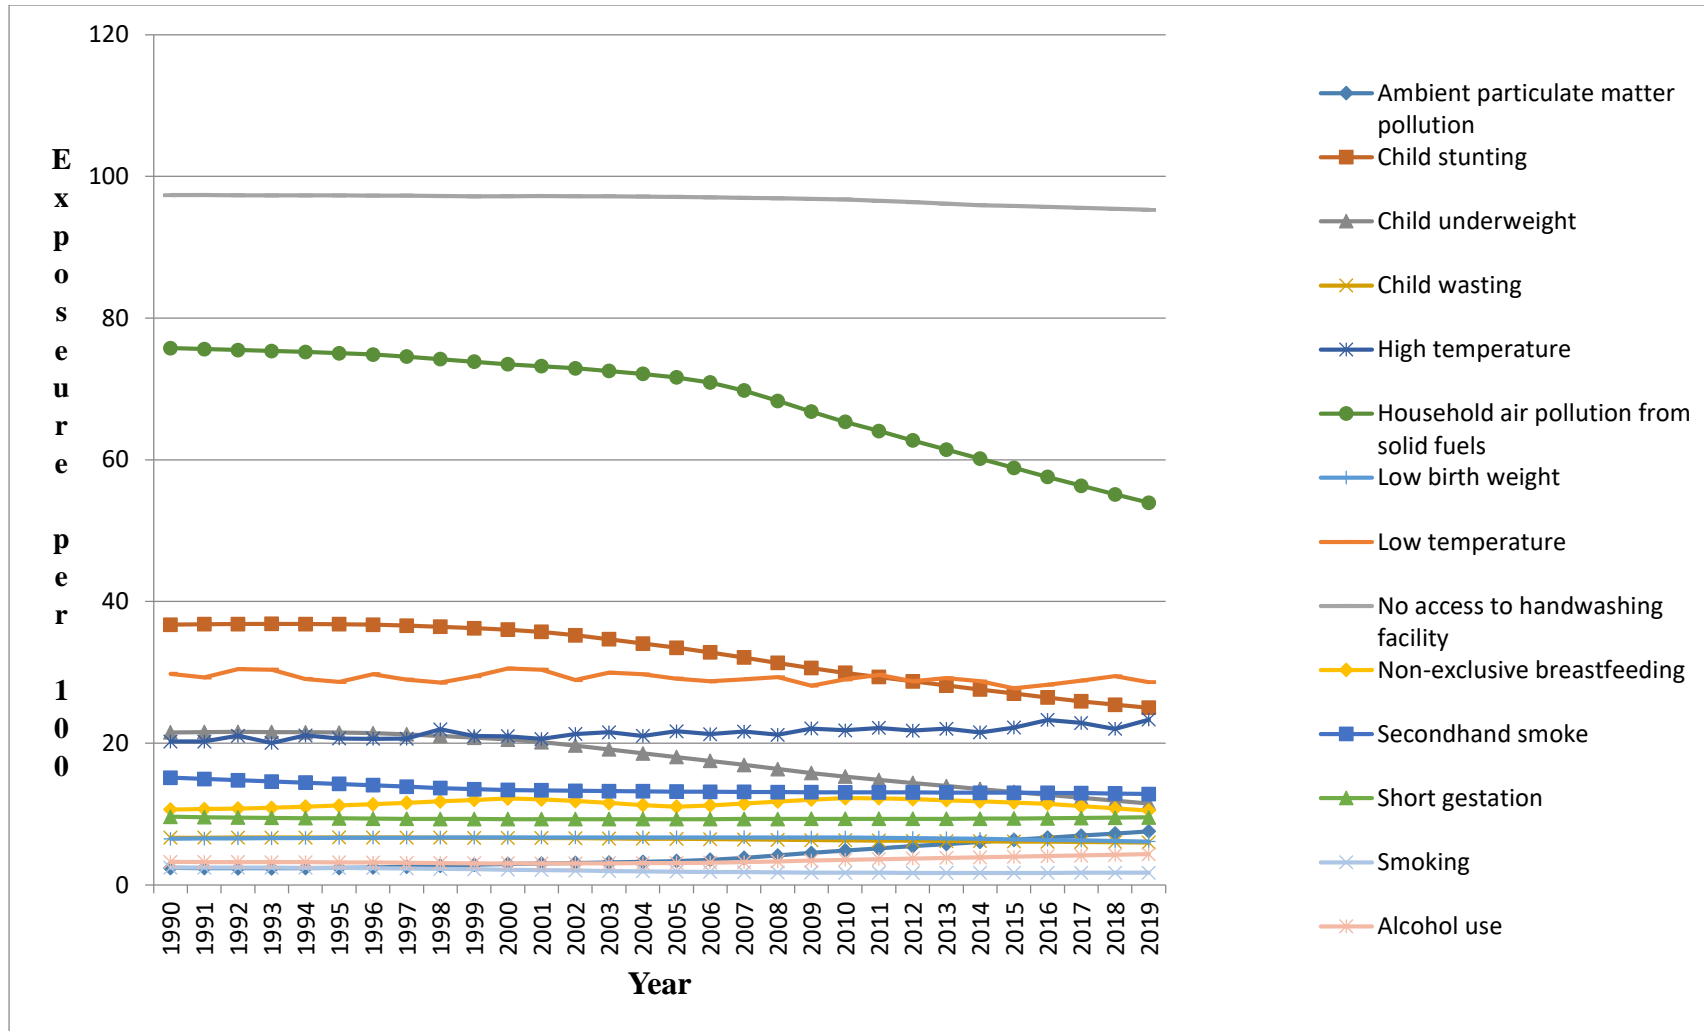

Supplemental Figure 10: Trends in the risk factors between 1990 and 2019 for all ages for Ethiopia

## Tables

Supplemental Table 1: Number and percentage changes of episode attributable to LRI in 1990 and 2019 for Ethiopia, its regions, both sexes

| Location    | All ages                       |                                |           | Children younger than 5 years  |                                |           | People above 70             |                             |          |
|-------------|--------------------------------|--------------------------------|-----------|--------------------------------|--------------------------------|-----------|-----------------------------|-----------------------------|----------|
|             | Episode, (95% UI),1990         | Episode, (95% UI),2019         | Change, % | Episode, (95% UI),1990         | Episode, (95% UI),2019         | Change, % | Episode, (95% UI),1990      | Episode, (95% UI),2019      | Change,% |
| Addis Ababa | 194122.9(175403.8-213856.2)    | 176027.6(162152.3-190557.8)    | 10        | 44940.6(35673.3-56859.6)       | 14522.3(11237-18367.5)         | 68        | 8099.5(6891.6-9463.2)       | 24034.2(20749.5-27702.3)    | 196**    |
| Oromia      | 2164243.7(1957719.5-2397957.9) | 2597863.9(2372089.2-2859925.6) | 20        | 739239.6(578477-935022.8)      | 613676.6(480687.2-765626.5)    | 17        | 110627.2(95303.7-129579.9)  | 292179.4(254670.4-342438.5) | 164**    |
| Amhara      | 1508431.4(1368059.8-1671550.1) | 1400682.4(1285323-1530939.8)   | 8         | 423999.3(334700.8-538426.8)    | 261397.4(206754.7-327889.7)    | 39        | 116332.8(98774.4-137194.5)  | 198977.5(173809.4-229925.5) | 71**     |
| SNNPs       | 1235554.9(1108317.9-1368520.3) | 1330491.5(1217176.7-1452694.1) | 7         | 421825.6(335087.1-526155.2)    | 307771.3(248326.4-385053.7)    | 28        | 68084.5(57450.7-79640.8)    | 99723(88168.3-113438)       | 46**     |
| Tigray      | 360795.1(328276.3-400714.9)    | 409829.8(376290.4-445030.2)    | 13        | 109047.9(86435.2-137691.1)     | 69958.2(55210.7-87468.6)       | 36        | 20653.3(17469.9-24256.6)    | 62677.2(53933.1-72927.6)    | 203**    |
| Harari      | 15145.9(13618.9-16851.9)       | 13765.3(12657-15054.7)         | 10        | 4693.6(3691.4-5990.1)          | 2188.4(1723.8-2761.3)          | 54        | 307.2(259.6-357)            | 1614.8(1396-1863.6)         | 425**    |
| Afar        | 113506.8(102317-126084.3)      | 113210.3(102987.9-124578)      | 1         | 32991.6(25672.4-42147.6)       | 26177.2(20744.1-32743.3)       | 21        | 2640.2(2212.5-3150.9)       | 7222.5(6246.8-8559.1)       | 173**    |
| Somali      | 300306.3(268988-336331.8)      | 463220.4(420429.8-516009.4)    | 54        | 103526.3(81391.3-131352.8)     | 126089.6(99611.9-160423.3)     | 21**      | 6182.3(5316-7370.4)         | 30203.2(25942.8-35038.5)    | 388**    |
| BG          | 68501.6(61804.9-75736.4)       | 71675.7(64972.1-79105.8)       | 4         | 20970.5(16626.7-26454.5)       | 18175.6(14339.5-22922.1)       | 14        | 3288.9(2784.8-3911.4)       | 4311.3(3743.8-5113.9)       | 31**     |
| Dire Dawa   | 30607.1(27359.8-34252.2)       | 26221.1(24010.1-28647.8)       | 15        | 9547.4(7523-12185)             | 4387.7(3439.6-5583.9)          | 55        | 1274.8(1090.1-1483.5)       | 2840.1(2469-3289.5)         | 122**    |
| Gambella    | 19687.9(17723.9-21945.7)       | 25685.2(23516.6-28093.2)       | 30**      | 6747.7(5338.7-8613.7)          | 4335.4(3428.4-5400.9)          | 36        | 1568.1(1316.6-1825.8)       | 1489.6(1281.4-1737.3)       | 6        |
| Ethiopia*   | 6010904.2(5467801.6-6648644.3) | 6628673.6(6108786.2-7230986.3) | 10**      | 1917530.8(1518850.1-2400978.5) | 1448680.4(1150089.8-1799704.4) | 25        | 339059.4(293491.9-387514.2) | 725273.3(640315.4-837746.3) | 113**    |

SNNP: Southern Nations, Nationalities, and Peoples; BG: Benishangul Gumuz; \*country's estimate; \*\*percentage increase between 1990 and 2019

Supplemental Table 2: Rate and percentage changes of episodes attributable to LRIs in 1990 and 2019 for Ethiopia and its regions, both sexes

| Location    | Age standardized                          |                                           |           | Children younger than 5 years             |                                           |           | People above 70                           |                                           |           |
|-------------|-------------------------------------------|-------------------------------------------|-----------|-------------------------------------------|-------------------------------------------|-----------|-------------------------------------------|-------------------------------------------|-----------|
|             | Episode per 100,000 people (95% UI), 1990 | Episode per 100,000 people (95% UI), 2019 | Change, % | Episode per 100,000 people (95% UI), 1990 | Episode per 100,000 people (95% UI), 2019 | Change, % | Episode per 100,000 people (95% UI), 1990 | Episode per 100,000 people (95% UI), 2019 | Change, % |
| Addis Ababa | 11373(10484.2-12197.4)                    | 6788.1(6285.1-7339.1)                     | 40        | 14666.9(11642.4-18556.9)                  | 4927.2(3812.5-6231.8)                     | 67        | 35138(29897.7-41054.2)                    | 30748.4(26546-35441.2)                    | 13        |
| Oromia      | 14613.1(13525.9-15725.8)                  | 8659.9(8040.1-9411.6)                     | 41        | 22232(17397.2-28120)                      | 9039.4(7080.5-11277.7)                    | 60        | 46498.3(40057.6-54464.4)                  | 41564.6(36228.7-48714.4)                  | 11        |
| Amhara      | 12826.4(11830-13882.8)                    | 7716.9(7162.3-8321.3)                     | 40        | 16487.1(13014.7-20936.6)                  | 8061.7(6376.4-10112.3)                    | 52        | 43580(37002.4-51395.2)                    | 35377.7(30902.9-40880.2)                  | 19        |
| SNNPs       | 13591.9(12538.6-14646.8)                  | 8235.5(7670.5-8846.4)                     | 39        | 20106.4(15972-25079.3)                    | 8427.1(6799.4-10543.2)                    | 59        | 44628.1(37657.5-52203.1)                  | 36616.1(32373.5-41652)                    | 18        |
| Tigray      | 13927.2(12858.2-15100.7)                  | 8663.8(8034-9382.3)                       | 38        | 19185.4(15207-24224.8)                    | 8342.1(6583.5-10430.1)                    | 57        | 43748.4(37005.1-51381)                    | 40859(35158.8-47541.2)                    | 7         |
| Harari      | 13014.6(11941-14066.7)                    | 7190.5(6684.1-7718.6)                     | 45        | 19672.6(15471.9-25106.9)                  | 6821.6(5373.5-8607.3)                     | 66        | 33916.7(28665.1-39416.7)                  | 32797.4(28354-37850.7)                    | 4         |
| Afar        | 15245.7(14050.8-16525.6)                  | 9350.1(8648.8-10157.4)                    | 39        | 21151.6(16459.1-27021.7)                  | 9365.5(7421.7-11714.7)                    | 56        | 39849(33393.8-47557.2)                    | 44368.7(38375.2-52580.1)                  | 11**      |
| Somali      | 11482.7(10638.1-12368.7)                  | 9220(8515.8-10046.3)                      | 20        | 16792.9(13202.4-21306.6)                  | 10062.7(7949.6-12802.8)                   | 41        | 32748.3(28159.7-39042.1)                  | 41031.2(35243.4-47600)                    | 25**      |
| BG          | 15628.1(14481-16809.3)                    | 9054.6(8394.2-9766)                       | 42        | 22041.1(17475.5-27805)                    | 10481.8(8269.5-13219)                     | 53        | 42911.6(36334.5-51032.5)                  | 37592.7(32643.9-44591.2)                  | 13        |
| Dire Dawa   | 12806.6(11807.9-13871.4)                  | 7148.8(6634.6-7750.7)                     | 44        | 19968.2(15734.3-25484.7)                  | 7191.5(5637.6-9152.1)                     | 64        | 38333(32779.4-44607)                      | 32033.6(27847.4-37101.4)                  | 17        |
| Gambella    | 13623.1(12637.4-14572.4)                  | 7575.8(7002.3-8128.2)                     | 44        | 21419.8(16947.2-27343.2)                  | 6791.1(5370.4-8460.1)                     | 69        | 40197.8(33751.8-46803.7)                  | 32657.1(28093.9-38087.2)                  | 19        |
| Ethiopia*   | 13619.7(12640.8-14588.6)                  | 8313.7(7757.6-8918)                       | 39        | 19486.4(15434.9-24399.3)                  | 8685.3(6895.1-10789.8)                    | 56        | 44092.2(38166.5-50393.4)                  | 38394.4(33896.9-44348.5)                  | 13        |

SNNP: Southern Nations, Nationalities, and Peoples; BG: Benishangul Gumuz; \*country's estimate; \*\*percentage increase between 2019 and 1990

Supplemental Table 3: Number and percentage changes of death attributable to LRIs in 1990 and 2019 for Ethiopia and its regions, both sexes.

| Location    | All age                  |                          |           | Children younger than 5   |                        |           | People above 70 years  |                          |           |
|-------------|--------------------------|--------------------------|-----------|---------------------------|------------------------|-----------|------------------------|--------------------------|-----------|
|             | death, (95% UI), 1990    | death, (95% UI), 2019    | Change, % | death, (95% UI), 1990     | Death, (95% UI), 2019  | Change, % | Death, (95% UI), 1990  | Death, (95% UI), 2019    | Change, % |
| Addis Ababa | 2159.3(1731.9-2690.7)    | 918.8(767.4-1116.9)      | 58        | 1353(981.9-1846.7)        | 69.1(41.7-107.4)       | 95        | 209.5(154.3-291.5)     | 393.6(320.9-495.3)       | 87**      |
| Oromia      | 40004.4(29432.4-51942.2) | 18206.1(15193.3-21745.4) | 55        | 30614.3(20932.5-42033.5)  | 8306.2(5763.5-11611.8) | 73        | 2793.5(2005.1-3673)    | 5971.6(4831.7-7093.4)    | 113**     |
| Amhara      | 25449.3(20869.5-30724.8) | 9525.5(7530.5-11872.2)   | 63        | 17780.1(13674.3-22720.1)  | 3079.5(1805.3-4737.3)  | 83        | 2717.2(2016.4-3535.8)  | 3839.9(3022.6-4825.6)    | 41**      |
| SNNPs       | 26044.7(20108-33017)     | 9494.7(7713.5-11649)     | -64       | 20390.6(14627.6-26712.9)  | 4326.6(2891.3-6157.2)  | 79        | 1771.7(1254.5-2417.6)  | 2302.6(1867.3-2772.8)    | 29**      |
| Gigay       | 6463.8(5272.1-7762.9)    | 2551.4(2090.3-3028.6)    | 61        | 4436(3373.5-5736)         | 564.2(364.9-825)       | 88        | 550.8(395.7-749.1)     | 1209.7(978.5-1467.8)     | 119**     |
| Harari      | 336(233.3-448.8)         | 93.1(73.8-116)           | 73        | 273.5(174.1-382.7)        | 28.8(16.4-44.3)        | 90        | 6.9(3.7-11)            | 34.1(27.1-41.8)          | 395**     |
| Afar        | 1717.5(1300.7-2243.4)    | 706.2(567.7-869.6)       | -59       | 1128.9(751.1-1596.7)      | 284.2(182.5-426)       | 75        | 66.9(43.5-102.1)       | 149.3(117.3-186.6)       | 123**     |
| Somali      | 3603.8(2620-4713.6)      | 3907.5(3007.4-4959.4)    | #N/A      | 2811.1(1929.6-3874.8)     | 2472.2(1695.2-3506.8)  | 13        | 150.8(98-222.3)        | 563.1(433.4-715.8)       | 273**     |
| BG          | 1549.2(1131.1-2097)      | 619(470.7-803)           | 61        | 1204.8(805.6-1703.9)      | 373(245.3-539.3)       | 70        | 74.7(50.3-105.7)       | 77(61.1-97.3)            | 3**       |
| Dire Dawa   | 632.3(445.5-830.9)       | 154.6(120.6-193.8)       | 76        | 518.4(329.5-718.7)        | 51(27.3-82.9)          | 91        | 28.8(20.1-40)          | 55(44-67.9)              | 90**      |
| Gambella    | 475.9(328.5-635.7)       | 123.2(98.2-151.9)        | 75        | 398.6(253.7-555.7)        | 36.4(20.7-57.2)        | 91        | 28.8(18.6-41.9)        | 30.9(24.6-38.1)          | 7**       |
| Ethiopia*   | 108436.6(87669-132758.3) | 46300.7(39515.8-54642.2) | 58        | 80909.9(62491.6-103448.8) | 19591.8(14018.4-26899) | 76        | 8400.1(6490.3-10700.9) | 14627.6(12393.7-16892.8) | 74**      |

SNNP: Southern Nations, Nationalities, and Peoples; BG: Benishangul Gumuz; \*country's estimate; \*\*percentage increase between 2019 and 1990

Supplemental Table 4: Age standardized mortality rate, Ethiopia and its regions, by sex, 2019.

| Age standardized mortality rate per 100,000 people, 2019 |                   |                   |
|----------------------------------------------------------|-------------------|-------------------|
| Location                                                 | Female            | Male              |
| Addis Ababa                                              | 47(35.5-62.5)     | 73.6(55-98.3)     |
| Oromia                                                   | 77.3(62-92.4)     | 100.3(79.9-123.5) |
| Amhara                                                   | 57.9(44.1-73.7)   | 92.5(70.5-122.1)  |
| SNNPs                                                    | 79.2(63.5-95.2)   | 118.8(94.3-146.3) |
| Tigray                                                   | 73.2(55.9-93.5)   | 96.9(74.8-122.3)  |
| Harari                                                   | 63(49-79.9)       | 95.7(72.5-123.4)  |
| Afar                                                     | 112.4(87.3-142.3) | 98.7(76.9-127.3)  |
| Somali                                                   | 88.3(69-111.4)    | 101.7(77.2-130.7) |
| Benishangul-Gumuz                                        | 109.2(82.6-138.8) | 95.8(74.6-124.1)  |
| Dire Dawa                                                | 56.2(42.5-71.3)   | 85.4(67.3-109.5)  |
| Gambella                                                 | 47.9(34.6-60.1)   | 120.2(95.6-149.5) |
| Ethiopia                                                 | 71.8(60.2-82.9)   | 100.6(84-121.4)   |

SNNP: Southern Nations, Nationalities, and Peoples

Supplemental Table 5: Number and percentage changes of YLL attributable to LRIs in 1990 and 2019 for Ethiopia and its regions, both sexes

|             | all age                        |                             |          | Children younger than 5 years  |                              |          | People above 70          |                          |          |
|-------------|--------------------------------|-----------------------------|----------|--------------------------------|------------------------------|----------|--------------------------|--------------------------|----------|
|             | YLL, (95% UI),1990             | YLL, (95% UI),2019          | Change,% | YLL, (95% UI),1990             | YLL, (95% UI),2019           | Change,% | YLL, (95% UI),1990       | YLL, (95% UI),2019       | Change,% |
| Addis Ababa | 149543.9(115542.6-195437)      | 29703.1(23833.4-36855.7)    | 81       | 118961.7(86499.1-162678.7)     | 6098.2(3693.1-9483.3)        | 95       | 3131.8(2301.7-4374.6)    | 5359.8(4334.8-6816.8)    | 71**     |
| Oromia      | 3019031.9(2144916.2-4057496.3) | 981808.4(748459.2-1278135)  | 68       | 2680397.2(1832260.4-3680767.1) | 729313.8(506226.4-1021016.9) | 73       | 44619.5(31636-59105.6)   | 78166.1(62837.5-93527.9) | 75**     |
| Amhara      | 1813522.3(1445106.4-2246142.2) | 428277.8(309674.7-583000.2) | 77       | 1560078.3(1201305.4-1993362.8) | 270909.2(158846-416496.1)    | 83       | 42578.2(31294.7-56216.9) | 50955.1(39726.1-64844.6) | 19**     |
| SNNPs       | 1993643.3(1489598.4-2577052.3) | 543135.8(405565.6-711397.4) | 73       | 1785675.1(1284021-2339272.5)   | 380166.4(254486.8-541224.9)  | 79       | 28746.2(20086.2-39789.1) | 31964.4(25673.6-38778.5) | 11**     |
| Tigray      | 455613.4(364406.1-569702.1)    | 96429.9(74139.8-122350.5)   | 79       | 389399.3(296618.1-504230.2)    | 49712.6(32198.3-72764.9)     | 88       | 9207.1(6568.7-12629.1)   | 16086.6(12946.2-19581.8) | 74**     |
| Harari      | 26755.3(17866.5-36380.3)       | 4273.6(2999.1-5798.4)       | 85       | 23959.3(15245.4-33513.8)       | 2541.6(1449.6-3887.3)        | 90       | 106.7(57.6-175.1)        | 455.9(361.3-558.3)       | 327**    |



1  
2  
3  
4  
5  
6  
7  
8  
9  
10  
11  
12  
13  
14  
15  
16  
17  
18

|           |                                 |                                |     |                                |                                |    |                             |                           |       |
|-----------|---------------------------------|--------------------------------|-----|--------------------------------|--------------------------------|----|-----------------------------|---------------------------|-------|
| Afar      | 124052(89386.4-166880.5)        | 39507.6(29535.5-52178.5)       | 69  | 99155.3(65972.9-140018.8)      | 24998.1(16028.5-37426.3)       | 75 | 1121.4(723.7-1722.7)        | 1931.7(1521.3-2395.6)     | 72**  |
| Somali    | 281532.2(201275.3-374880.8)     | 266379.4(193669.7-357880.7)    | 6   | 247138.5(169803.8-339740.3)    | 216954(148995.2-307369.5)      | 13 | 2256.6(1434.6-3376.4)       | 7542.1(5740-9680.2)       | 234** |
| BG        | 119211.2(83517.3-165095.7)      | 42245.6(30388.8-57591.8)       | -65 | 105463.5(70756-148983.1)       | 32718.1(21576.4-47307.2)       | 69 | 1256.7(836.7-1780.3)        | 1094.3(857.5-1389.1)      | 13    |
| Dire Dawa | 50024.5(33464.5-67580.6)        | 7267.7(5038-10264.7)           | 86  | 45377.4(28907.2-62914.9)       | 4497.4(2411.8-7298.3)          | 91 | 439.2(306.6-609.5)          | 742.1(586.6-922.8)        | 68**  |
| Gambella  | 37680.8(24783.6-51516.1)        | 6064.4(4389.3-7853.6)          | 84  | 34899.5(22233.1-48609.4)       | 3212.2(1830.4-5034.1)          | 91 | 460.7(299.3-663.6)          | 457.5(352.6-577.6)        | 1     |
| Ethiopia* | 8070611.3(6356905.2-10091563.7) | 2445093.7(1934420.8-3119838.6) | 70  | 7090505.4(5482895.7-9059421.2) | 1721122.3(1231032.1-2362958.7) | 76 | 133924.6(102756.8-170932.9) | 194756.2(165462-225502.1) | 45**  |

SNNP: Southern Nations, Nationalities, and Peoples; BG: Benishangul Gumuz; \*country's estimate; \*\*percentage increase between 2019 and 1990

Supplemental Table 6: Rate and percentage changes of YLL attributable to LRIs in 1990 and 2019 for Ethiopia and its regions, both sexes.

| Location    | all age                      |                              |          | Children younger than 5 years |                              |          | People above 70              |                              |          |
|-------------|------------------------------|------------------------------|----------|-------------------------------|------------------------------|----------|------------------------------|------------------------------|----------|
|             | YLL per 100,000 people, 1990 | YLL per 100,000 people, 2019 | Change,% | YLL per 100,000 people, 1990  | YLL per 100,000 people, 2019 | Change,% | YLL per 100,000 people, 1990 | YLL per 100,000 people, 2019 | Change,% |
| Addis Ababa | 6362.2(5161.9-7847.9)        | 1285.6(1065-1561.8)          | 80       | 38824.7(28230.1-53092.4)      | 6857.1(5545.8-8721.2)        | 95       | 13587(9985.4-18978.3)        | 6857.1(5545.8-8721.2)        | 50       |
| Oromia      | 11217.6(8517-14318)          | 2433.8(2042.2-2879.5)        | 78       | 80610.7(55103.7-110696)       | 11119.7(8939.1-13305)        | 87       | 18754.2(13297.1-24843)       | 11119.7(8939.1-13305)        | 41       |
| Amhara      | 8690.4(7146.3-10453.8)       | 2016.4(1551.4-2541.8)        | 77       | 60663.3(46712.5-77511.5)      | 9059.7(7063.2-11529.2)       | 87       | 15950.4(11723.4-21059.7)     | 9059.7(7063.2-11529.2)       | 44       |
| SNNPs       | 11633(9119.4-14477.9)        | 2698.1(2243.5-3250.2)        | 77       | 85114.7(61203.2-111502.1)     | 11736.6(9426.7-14238.6)      | 88       | 18842.6(13166.1-26081)       | 11736.6(9426.7-14238.6)      | 38       |
| Tigray      | 10346.4(8522.9-12340.3)      | 1977.1(1593.9-2395)          | 81       | 68509.3(52185.7-88712.2)      | 10486.8(8439.5-12765.3)      | 92       | 19502.8(13914.1-26751.2)     | 10486.8(8439.5-12765.3)      | 47       |
| Harari      | 12826.5(9336.5-16985.4)      | 2060.4(1595.6-2623.1)        | 84       | 100421.7(63898.7-140467.8)    | 9260.4(7338.7-11340.3)       | 93       | 11782.6(6360.4-19341.1)      | 9260.4(7338.7-11340.3)       | 22       |
| Afar        | 10993.5(8520.8-14193.6)      | 2824.6(2323-3414)            | 74       | 63570.5(42296.6-89769)        | 11867.1(9346-14716.9)        | 86       | 16925.5(10923.7-26001.7)     | 11867.1(9346-14716.9)        | 30       |
| Somali      | 6286.9(4860.5-7970)          | 3236.4(2537.4-4006)          | 49       | 40088.1(27543.7-55109)        | 10246(7797.8-13150.6)        | 57       | 11953.6(7599.2-17885.5)      | 10246(7797.8-13150.6)        | 15       |
| BG          | 14965.1(11197.4-19998.6)     | 3571.1(2772.4-4510.7)        | 76       | 110847.2(74368-156588.4)      | 9541.9(7476.9-12112.3)       | 83       | 16397.3(10917-23228.5)       | 9541.9(7476.9-12112.3)       | 42       |

41  
42  
43  
44  
45  
46

1  
2

|             |                         |                       |    |                           |                         |    |                          |                         |    |
|-------------|-------------------------|-----------------------|----|---------------------------|-------------------------|----|--------------------------|-------------------------|----|
| 3 Dire Dawa | 11749.7(8605.4-15249.5) | 1832.8(1407.3-2363.1) | 84 | 94905.3(60458.5-131584.5) | 8371(6616.3-10408.2)    | 93 | 13207.9(9219.6-18328.2)  | 8371(6616.3-10408.2)    | 37 |
| 4 Gambella  | 13175.8(9291-17411)     | 1937.4(1567.6-2344.6) | 85 | 110783.8(70576-154304.1)  | 10030.9(7730.2-12664.9) | 96 | 11811.4(7673.5-17012.5)  | 10030.9(7730.2-12664.9) | 16 |
| 5 Ethiopia* | 10189.1(8347.5-12201.8) | 2404.5(2059.4-2833.3) | 76 | 72055.4(55718.5-92064)    | 10309.9(8759.2-11937.6) | 86 | 17415.9(13362.7-22228.5) | 10309.9(8759.2-11937.6) | 41 |

6 SNNP: Southern Nations, Nationalities, and Peoples; BG: Benishangul Gumuz; \*country's estimate; \*\*percentage increase between 2019 and 1990

7

8

9

10

11

12

13

14

15

16

17

18

19

20

21

22

23

24

25

26

27

28

29

30

31

32

33

34

35

36

37

38

39

40

41

42

43

44

45  
46

*This table indicate the rates of the years of life lost due to lower respiratory infection per 100,000 population for the year 1990 and 2019 and the percentage changes between the two years for three age categories ( for all age groups, children younger than 5 years and people above 70 years).*

## Authors contributions

### **Providing data or critical feedback on data sources**

Semagn Mekonnen Abate, Mesafint Molla Adane, Addis Aklilu, Dejene Tsegaye Alem, Mulusew A Asemahagn, Hunegnaw Abebe, Melaku Ashagrie Belete, Tekleberhan Hailemariam, Tezera Moshago Berheto, Belay Boda Abule Bodicha, Daniel Baza Gargamo, Alemayehu Hailu, Awoke Misganaw, Mohsen Naghavi, Negussie Boti Sidamo, Yonatan Solomon, Shambel Wedajo, Melat Weldemariam, Amanuel Yigezu, Fentabil Getnet, and Yazachew Yismaw.

### **Developing methods or computational machinery**

Semagn Mekonnen Abate, Tezera Moshago Berheto, Alemayehu Hailu, Mohsen Naghavi, Negussie Boti Sidamo, and Amanuel Yigezu.

### **Providing critical feedback on methods or results**

Semagn Mekonnen Abate, Mesafint Molla Adane, Gizachew Taddesse Akalu, Addis Aklilu, Dejene Tsegaye Alem, Zeleke Gebru, Mulusew Andualem Asemahagn, Daniel Atlaw, Tewachew Awoke, Hunegnaw Abebe, Melaku Ashagrie Belete, Tekleberhan Hailemariam, Tezera Moshago Berheto, Alesmeshet Yirga, Setognal Birara Aychiluhm, Belay Boda Abule Bodicha, Chuchu Churko, Feleke Mekonnen Demeke, Abebaw Alemayehu Desta, Lankamo Ena, Tahir Eyayu, Zinabu Fentaw, Daniel Baza Gargamo, Mesfin Damtew Gebrehiwot, Mathewos Alemu Gebremichael, Melaku Getachew, Ababi Zergaw, Alemayehu Hailu, Getahun Molla, Awoke Misganaw, Mohsen Naghavi, Biniyam Sahiledengle, Bereket Beyene, Migbar Sibhat, Negussie Boti Sidamo, Damtew Damtew Solomon, Yonatan Solomon, Birhanu Wagaye, Shambel Wedajo, Melat Weldemariam, Amanuel Yigezu, Fentabil Getnet, and Yazachew Yismaw.

### **Drafting the work or revising is critically for important intellectual content**

Semagn Mekonnen Abate, Gizachew Taddesse Akalu, Mulusew A Asemahagn, Daniel Atlaw, Nigus Cherie Bekele, Melaku Ashagrie Belete, Tezera Moshago Berheto, Setognal Birara Aychiluhm, Belay Boda Abule Bodicha, Chuchu Churko, Tahir Eyayu, Zinabu Fentaw, Daniel Baza Gargamo, Melaku Getachew, Ababi Zergaw, Firehiwot Abebe Gobena, Muluken Argaw Haile, Alemayehu Hailu, Solomon Tessema Memirie, Awoke Misganaw, Mohsen Naghavi, Biniyam Sahiledengle, Bereket Beyene, Negussie Boti Sidamo, Yonatan Solomon, Dereje Mengistu Tolosa, Birhanu Wagaye, Ally Walker, Amanuel Yigezu, and Fentabil Getnet.

### **Managing the estimation or publications process**

Semagn Mekonnen Abate, Awoke Misganaw, Mohsen Naghavi, Negussie Boti Sidamo, and Amanuel Yigezu.

## STROBE Statement—checklist of items that should be included in reports of observational studies

|                              | Item No. | Recommendation                                                                                                                                                                                                                                                                                                                                                                                                                                                         | Page No. (Line No.) |
|------------------------------|----------|------------------------------------------------------------------------------------------------------------------------------------------------------------------------------------------------------------------------------------------------------------------------------------------------------------------------------------------------------------------------------------------------------------------------------------------------------------------------|---------------------|
| <b>Title and abstract</b>    | 1        | (a) Indicate the study's design with a commonly used term in the title or the abstract                                                                                                                                                                                                                                                                                                                                                                                 | 1 (1-2)             |
|                              |          | (b) Provide in the abstract an informative and balanced summary of what was done and what was found                                                                                                                                                                                                                                                                                                                                                                    | 4 and 5 (73-89)     |
| <b>Introduction</b>          |          |                                                                                                                                                                                                                                                                                                                                                                                                                                                                        |                     |
| Background/rationale         | 2        | Explain the scientific background and rationale for the investigation being reported                                                                                                                                                                                                                                                                                                                                                                                   | 7 (140-147)         |
| Objectives                   | 3        | State specific objectives, including any prespecified hypotheses                                                                                                                                                                                                                                                                                                                                                                                                       | 7 (148-153)         |
| <b>Methods</b>               |          |                                                                                                                                                                                                                                                                                                                                                                                                                                                                        |                     |
| Study design                 | 4        | Present key elements of study design early in the paper                                                                                                                                                                                                                                                                                                                                                                                                                | 10 (194-214)        |
| Setting                      | 5        | Describe the setting, locations, and relevant dates, including periods of recruitment, exposure, follow-up, and data collection                                                                                                                                                                                                                                                                                                                                        | 8 and 9 (175-192)   |
| Participants                 | 6        | (a) <i>Cohort study</i> —Give the eligibility criteria, and the sources and methods of selection of participants. Describe methods of follow-up<br><i>Case-control study</i> —Give the eligibility criteria, and the sources and methods of case ascertainment and control selection. Give the rationale for the choice of cases and controls<br><i>Cross-sectional study</i> —Give the eligibility criteria, and the sources and methods of selection of participants | 8 and 9 (175-192)   |
|                              |          | (b) <i>Cohort study</i> —For matched studies, give matching criteria and number of exposed and unexposed<br><i>Case-control study</i> —For matched studies, give matching criteria and the number of controls per case                                                                                                                                                                                                                                                 |                     |
| Variables                    | 7        | Clearly define all outcomes, exposures, predictors, potential confounders, and effect modifiers. Give diagnostic criteria, if applicable                                                                                                                                                                                                                                                                                                                               | 9 and 10 (194-214)  |
| Data sources/<br>measurement | 8*       | For each variable of interest, give sources of data and details of methods of assessment (measurement). Describe comparability of assessment methods if there is more than one group                                                                                                                                                                                                                                                                                   | 8 and 9 (175-192)   |
| Bias                         | 9        | Describe any efforts to address potential sources of bias                                                                                                                                                                                                                                                                                                                                                                                                              | 10 (211-214)        |
| Study size                   | 10       | Explain how the study size was arrived at                                                                                                                                                                                                                                                                                                                                                                                                                              | 8 (175-184)         |

Continued on next page

|    |                  |     |                                                                                                           |              |                                  |
|----|------------------|-----|-----------------------------------------------------------------------------------------------------------|--------------|----------------------------------|
| 1  |                  |     |                                                                                                           |              |                                  |
| 2  | Quantitative     | 11  | Explain how quantitative variables were handled in the analyses. If applicable, describe which            | 9 (200-206)  |                                  |
| 3  | variables        |     | groupings were chosen and why                                                                             |              |                                  |
| 4  |                  |     |                                                                                                           |              |                                  |
| 5  | Statistical      | 12  | (a) Describe all statistical methods, including those used to control for confounding                     | 9 (200-206)  |                                  |
| 6  | methods          |     | (b) Describe any methods used to examine subgroups and interactions                                       | 10 (211-214) |                                  |
| 7  |                  |     | (c) Explain how missing data were addressed                                                               | 9 and 10     |                                  |
| 8  |                  |     |                                                                                                           | (194-214)    |                                  |
| 9  |                  |     |                                                                                                           |              |                                  |
| 10 |                  |     | (d) <i>Cohort study</i> —If applicable, explain how loss to follow-up was addressed                       |              |                                  |
| 11 |                  |     | <i>Case-control study</i> —If applicable, explain how matching of cases and controls was addressed        |              |                                  |
| 12 |                  |     | <i>Cross-sectional study</i> —If applicable, describe analytical methods taking account of sampling       |              |                                  |
| 13 |                  |     | strategy                                                                                                  |              |                                  |
| 14 |                  |     |                                                                                                           |              |                                  |
| 15 |                  |     | (e) Describe any sensitivity analyses                                                                     | 10 (211-214) |                                  |
| 16 |                  |     |                                                                                                           |              |                                  |
| 17 | <b>Results</b>   |     |                                                                                                           |              |                                  |
| 18 | Participants     | 13* | (a) Report numbers of individuals at each stage of study—eg numbers potentially eligible, examined        | 10 (216-221) |                                  |
| 19 |                  |     | for eligibility, confirmed eligible, included in the study, completing follow-up, and analysed            |              |                                  |
| 20 |                  |     | (b) Give reasons for non-participation at each stage                                                      |              | This is a population level study |
| 21 |                  |     | (c) Consider use of a flow diagram                                                                        |              |                                  |
| 22 |                  |     |                                                                                                           |              |                                  |
| 23 | Descriptive data | 14* | (a) Give characteristics of study participants (eg demographic, clinical, social) and information on      | 7 and 8      | Described in the method section  |
| 24 |                  |     | exposures and potential confounders                                                                       | (156-168)    |                                  |
| 25 |                  |     | (b) Indicate number of participants with missing data for each variable of interest                       |              | This is a population level study |
| 26 |                  |     | (c) <i>Cohort study</i> —Summarise follow-up time (eg, average and total amount)                          | 12-19 (255-  |                                  |
| 27 |                  |     |                                                                                                           | 361          |                                  |
| 28 |                  |     |                                                                                                           |              |                                  |
| 29 | Outcome data     | 15* | <i>Cohort study</i> —Report numbers of outcome events or summary measures over time                       |              |                                  |
| 30 |                  |     | <i>Case-control study</i> —Report numbers in each exposure category, or summary measures of exposure      |              |                                  |
| 31 |                  |     | <i>Cross-sectional study</i> —Report numbers of outcome events or summary measures                        | 12-19 (255-  |                                  |
| 32 |                  |     |                                                                                                           | 361          |                                  |
| 33 |                  |     |                                                                                                           |              |                                  |
| 34 | Main results     | 16  | (a) Give unadjusted estimates and, if applicable, confounder-adjusted estimates and their precision       | 12-19 (255-  |                                  |
| 35 |                  |     | (eg, 95% confidence interval). Make clear which confounders were adjusted for and why they were           | 361          |                                  |
| 36 |                  |     | included                                                                                                  |              |                                  |
| 37 |                  |     | (b) Report category boundaries when continuous variables were categorized                                 | 12-19 (255-  |                                  |
| 38 |                  |     |                                                                                                           | 361          |                                  |
| 39 |                  |     | (c) If relevant, consider translating estimates of relative risk into absolute risk for a meaningful time |              |                                  |
| 40 |                  |     |                                                                                                           |              |                                  |
| 41 |                  |     |                                                                                                           |              |                                  |
| 42 |                  |     |                                                                                                           |              |                                  |
| 43 |                  |     |                                                                                                           |              |                                  |
| 44 |                  |     |                                                                                                           |              |                                  |
| 45 |                  |     |                                                                                                           |              |                                  |
| 46 |                  |     |                                                                                                           |              |                                  |

---

period

---

Continued on next page

For peer review only

|                          |    |                                                                                                                                                                            |                     |
|--------------------------|----|----------------------------------------------------------------------------------------------------------------------------------------------------------------------------|---------------------|
| Other analyses           | 17 | Report other analyses done—eg analyses of subgroups and interactions, and sensitivity analyses                                                                             | 12-19 (255-361)     |
| <b>Discussion</b>        |    |                                                                                                                                                                            |                     |
| Key results              | 18 | Summarise key results with reference to study objectives                                                                                                                   | 19 (363-371)        |
| Limitations              | 19 | Discuss limitations of the study, taking into account sources of potential bias or imprecision. Discuss both direction and magnitude of any potential bias                 | 23 and 24 (461-471) |
| Interpretation           | 20 | Give a cautious overall interpretation of results considering objectives, limitations, multiplicity of analyses, results from similar studies, and other relevant evidence | 19-23 (373-460)     |
| Generalisability         | 21 | Discuss the generalisability (external validity) of the study results                                                                                                      | 24 (475-486)        |
| <b>Other information</b> |    |                                                                                                                                                                            |                     |
| Funding                  | 22 | Give the source of funding and the role of the funders for the present study and, if applicable, for the original study on which the present article is based              | 25 (506-508)        |

\*Give information separately for cases and controls in case-control studies and, if applicable, for exposed and unexposed groups in cohort and cross-sectional studies.

**Note:** An Explanation and Elaboration article discusses each checklist item and gives methodological background and published examples of transparent reporting. The STROBE checklist is best used in conjunction with this article (freely available on the Web sites of PLoS Medicine at <http://www.plosmedicine.org/>, Annals of Internal Medicine at <http://www.annals.org/>, and Epidemiology at <http://www.epidem.com/>). Information on the STROBE Initiative is available at [www.strobe-statement.org](http://www.strobe-statement.org).
